# Supplementary material for: Latrophilin GPCR signaling mediates synapse formation
Source: eLife. 2021 Mar 1;10:e65717. doi: 10.7554/eLife.65717 (PMC7954527; doi:10.7554/eLife.65717)
Supplement: Figure 1—source data 1. [file elife-65717-fig1-data1.xlsx]

## Sheet: Sheet1
	Figure 1B																				Figure 1C																		Figure 1D
	Lphn2 aggregation index								Lphn3 aggregation index												Lphn2 surface staining intensity													Lphn2 puncta area (um^2)					Surface Staining Intensity
	CMV	WT Lphn2 w/ FLRT3	WT Lphn2 w/ Ten2	T4L Lphn2 w/ FLRT3	T4L Lphn2 w/ Ten2				pCMV w/ FLRT3	pCMV w/ Ten2	WT w/ FLRT3	WT w/ Ten2	T4L w/ FLRT3	T4L w/ Ten2	ECD w/ FLRT3	ECD w/ Ten2	deltaCt w/ FLRT3	deltaCt w/ Ten2			Negative control				WT Lphn2				T4L Lphn2					WT Lphn2	T4L Lphn2				Negative Control				WT Lphn3				T4L Lphn3
	9.6067	79.4964	68.2152	72.4813	85.4541				17.7456	20.1431	57.3462	66.3641	88.2147	53.6842	51.2842	68.621	90.1375	70.418			MAP2	FLAG	Ratio		MAP2	FLAG	Ratio		MAP2	FLAG	Ratio			0.148556	0.355201				MAP2	FLAG	Ratio		MAP2	FLAG	Ratio		MAP2	FLAG	Ratio
	13.061	76.7091	69.0446	75.5756	61.2591				16.6453	11.2364	79.6428	75.6015	80.2146	66.5123	87.3241	86.34	82.3562	56.801			35512884	2736549	0.0770579		35795914	14123353	0.394552		50814884	16278841	0.320356			0.393077	0.122882				50214209	2842953	0.0566165		43618996	25236605	0.578569		43843583	18580093	0.423781
	11.2549	82.9313	72.9717	69.8799	51.1921				18.1232	19.3305	87.4622	77.6902	56.5618	79.2841	75.3942	90.217	63.048	84.271			50414494	1995147	0.0395749		34166514	21569679	0.63131		31622666	21338999	0.674801			0.179088	0.180257				52770969	2271777	0.0430497		36874135	13700438	0.371546		30211822	21119834	0.699059
	2.85415	90.8093	89.9015	93.7431	88.5094				9.64231	22.1236	56.2854	80.219	70.2185	81.0642	57.2147	67.674	55.1254	51.227			30155269	1457849	0.0483448		23683806	7370315	0.311196		47089939	17812269	0.378261			0.111879	0.112085				53362051	2787777	0.0522427		48137544	30241707	0.628235		74307633	10960732	0.147505
	4.32942	89.9985	88.2563	93.626	90.6942				21.0123	16.1638	69.3284	57.206	68.1296	64.642	90.3115	55.274	58.6941	79.81			54541987	1515298	0.0277822		57463268	19932252	0.346869		39485108	23877866	0.604731			0.123822	0.27991				56299394	2760071	0.0490249		31143670	14836600	0.476392		29176242	13754122	0.471415
	4.76859	90.3737	87.6273	92.8942	88.3676				19.9143	15.8269	54.3254	79.21	66.4871	60.0941	77.7215	85.641	77.6742	80.227			38719519	2371554	0.0612496		48129962	22856649	0.474894		34330580	22841259	0.665333			0.200149	0.155209				37718591	2825087	0.0748991		57488239	26832207	0.466743		39608418	20901942	0.527715
	3.95132	90.4807	84.0051	87.8822	88.5135				15.9812	23.2058	70.2015	81.0283	59.6952	75.621	67.4269	92.331	51.2963	60.837							40124848	31878791	0.79449		47178499	20211990	0.428415												60005690	22286380	0.371404		25975938	19750799	0.76035
	5.36396	91.5572	83.5074	89.0909	84.0051				18.4319	14.3147	79.0254	61.254	75.413	82.3141	76.7568	51.241	53.674	62.4471																									46974627	20757354	0.441884		21834906	20348265	0.931914
	5.75212	100	81.7855	88.6265	83.5074				11.1092	12.1189	68.2015	79.8241	70.2585	67.284	81.226	89.1181	68.6014	51.897																									26063874	31234048	1.19837
																					ANOVA summary													P value	0.8905								48687173	20269339	0.416318
	WT Lphn2 vs. FLRT3								WT Lphn3 vs. FLRT3												F	17.02												P value summary	ns
	ANOVA summary								ANOVA summary												P value	0.0002												Significantly different (P < 0.05)?	No
	F	370.5							F	43.09											P value summary	***												One- or two-tailed P value?	Two-tailed
	P value	<0.0001							P value	<0.0001											Significant diff. among means (P < 0.05)?	Yes												t, df	t=0.1412, df=10				ANOVA summary
	P value summary	****							P value summary	****											R squared	0.7086																	F	10.87
	Significant diff. among means (P < 0.05)?	Yes							Significant diff. among means (P < 0.05)?	Yes																													P value	<0.0001
	R squared	0.9686							R squared	0.8116											Tukey's multiple comparisons test	Mean Diff.	95.00% CI of diff.	Significant?	Summary	Adjusted P Value													P value summary	****
																					Negative control vs. WT Lphn2	-0.4414	-0.6719 to -0.2109	Yes	***	0.0005													Significant diff. among means (P < 0.05)?	Yes
	Tukey's multiple comparisons test	Mean Diff.	95.00% CI of diff.	Significant?	Summary	Adjusted P Value			Tukey's multiple comparisons test	Mean Diff.	95.00% CI of diff.	Significant?	Summary	Adjusted P Value							Negative control vs. T4L Lphn2	-0.4612	-0.6917 to -0.2307	Yes	***	0.0003													R squared	0.5917
	CMV vs. WT Lphn2 w/ FLRT3	-81.27	-89.71 to -72.82	Yes	****	<0.0001	A-B		pCMV w/ FLRT3 vs. WT w/ FLRT3	-52.58	-67.40 to -37.76	Yes	****	<0.0001							WT Lphn2 vs. T4L Lphn2	-0.01977	-0.2395 to 0.2000	No	ns	0.97
	CMV vs. T4L Lphn2 w/ FLRT3	-78.1	-86.54 to -69.65	Yes	****	<0.0001	A-C		pCMV w/ FLRT3 vs. T4L w/ FLRT3	-54.07	-68.89 to -39.24	Yes	****	<0.0001																									Tukey's multiple comparisons test	Mean Diff.	95.00% CI of diff.	Significant?	Summary	Adjusted P Value
	WT Lphn2 w/ FLRT3 vs. T4L Lphn2 w/ FLRT3	3.173	-5.272 to 11.62	No	ns	0.622	B-C		pCMV w/ FLRT3 vs. ECD w/ FLRT3	-57.34	-72.16 to -42.52	Yes	****	<0.0001																									Negative control vs. WT Lphn3	-0.4948	-0.7886 to -0.2009	Yes	***	0.0003	A-B
									pCMV w/ FLRT3 vs. deltaCt w/ FLRT3	-50.22	-65.04 to -35.40	Yes	****	<0.0001																									Negative control vs. T4L Lphn3	-0.5108	-0.8193 to -0.2023	Yes	***	0.0004	A-C
	WT Lphn2 vs. Ten2								WT w/ FLRT3 vs. T4L w/ FLRT3	-1.486	-16.31 to 13.34	No	ns	0.9985																									Negative control vs. ECD Lphn3	-0.3094	-0.6097 to -0.009098	Yes	*	0.0409	A-D
	ANOVA summary								WT w/ FLRT3 vs. ECD w/ FLRT3	-4.76	-19.58 to 10.06	No	ns	0.8886																									Negative control vs. deltaCt Lphn3	-0.6608	-0.9798 to -0.3418	Yes	****	<0.0001	A-E
	F	174.7							WT w/ FLRT3 vs. deltaCt w/ FLRT3	2.357	-12.47 to 17.18	No	ns	0.9909																									WT Lphn3 vs. T4L Lphn3	-0.01602	-0.2815 to 0.2495	No	ns	0.9998	B-C
	P value	<0.0001							T4L w/ FLRT3 vs. ECD w/ FLRT3	-3.274	-18.10 to 11.55	No	ns	0.9691																									WT Lphn3 vs. ECD Lphn3	0.1854	-0.07063 to 0.4413	No	ns	0.2463	B-D
	P value summary	****							T4L w/ FLRT3 vs. deltaCt w/ FLRT3	3.843	-10.98 to 18.66	No	ns	0.9456																									WT Lphn3 vs. deltaCt Lphn3	-0.1661	-0.4437 to 0.1116	No	ns	0.429	B-E
	Significant diff. among means (P < 0.05)?	Yes							ECD w/ FLRT3 vs. deltaCt w/ FLRT3	7.117	-7.705 to 21.94	No	ns	0.649																									T4L Lphn3 vs. ECD Lphn3	0.2014	-0.07127 to 0.4740	No	ns	0.2292	C-D
	R squared	0.9357																																					T4L Lphn3 vs. deltaCt Lphn3	-0.15	-0.4431 to 0.1431	No	ns	0.5798	C-E
									WT Lphn3 vs. Ten2																														ECD Lphn3 vs. deltaCt Lphn3	-0.3514	-0.6359 to -0.06690	Yes	**	0.0097	D-E
	Tukey's multiple comparisons test	Mean Diff.	95.00% CI of diff.	Significant?	Summary	Adjusted P Value			ANOVA summary
	CMV vs. WT Lphn2 w/ Ten2	-73.82	-85.18 to -62.46	Yes	****	<0.0001			F	44.29
	CMV vs. T4L Lphn2 w/ Ten2	-73.4	-84.75 to -62.04	Yes	****	<0.0001			P value	<0.0001
	WT Lphn2 w/ Ten2 vs. T4L Lphn2 w/ Ten2	0.4236	-10.93 to 11.78	No	ns	0.9952			P value summary	****
									Significant diff. among means (P < 0.05)?	Yes
									R squared	0.8158
									Tukey's multiple comparisons test	Mean Diff.	95.00% CI of diff.	Significant?	Summary	Adjusted P Value
									pCMV w/ Ten2 vs. WT w/ Ten2	-55.99	-70.90 to -41.08	Yes	****	<0.0001	A-B
									pCMV w/ Ten2 vs. T4L w/ Ten2	-52.89	-67.80 to -37.98	Yes	****	<0.0001	A-C
									pCMV w/ Ten2 vs. ECD w/ Ten2	-59.11	-74.02 to -44.20	Yes	****	<0.0001	A-D
									pCMV w/ Ten2 vs. deltaCt w/ Ten2	-49.27	-64.18 to -34.37	Yes	****	<0.0001	A-E
									WT w/ Ten2 vs. T4L w/ Ten2	3.1	-11.81 to 18.01	No	ns	0.9752	B-C
									WT w/ Ten2 vs. ECD w/ Ten2	-3.118	-18.03 to 11.79	No	ns	0.9747	B-D
									WT w/ Ten2 vs. deltaCt w/ Ten2	6.718	-8.190 to 21.63	No	ns	0.7005	B-E
									T4L w/ Ten2 vs. ECD w/ Ten2	-6.217	-21.13 to 8.691	No	ns	0.7563	C-D
									T4L w/ Ten2 vs. deltaCt w/ Ten2	3.618	-11.29 to 18.53	No	ns	0.9568	C-E
									ECD w/ Ten2 vs. deltaCt w/ Ten2	9.836	-5.073 to 24.74	No	ns	0.3421	D-E
