# Supplementary material for: Latrophilin GPCR signaling mediates synapse formation
Source: eLife. 2021 Mar 1;10:e65717. doi: 10.7554/eLife.65717 (PMC7954527; doi:10.7554/eLife.65717)
Supplement: Figure 2—source data 1. [file elife-65717-fig2-data1.xlsx]

## Sheet: Sheet1
	Figure 2A																																													Figure 2C
	Pink Flamindo reporter experiment
	Negative control				Negative control with Gs				Negative control with Gs/PDE				Lphn3 with Gs				Lphn3 with Gs/PDE				T4L Lphn3 with Gs				T4L Lphn3 with Gs/PDE				Lphn2 with Gs				Lphn2 with Gs/PDE				T4L Lphn2 with Gs				T4L Lphn2 with Gs/PDE					phospho-tdTomato validation
	GFP	flamindo	ratio		GFP	flamindo	ratio		GFP	flamindo	ratio		GFP	flamindo	ratio		GFP	flamindo	ratio		GFP	flamindo	ratio		GFP	flamindo	ratio		GFP	flamindo	ratio		GFP	flamindo	ratio		GFP	flamindo	ratio		GFP	flamindo	ratio
	40679714	14076920	0.346043		29680790	9959734	0.335562		42757711	14682316	0.343384		35026222	10926751	0.311959		25533360	6883491	0.269588		57370018	16015202	0.279156		42698682	13518927	0.316612		24655208	19026860	0.771718		31501661	9450145	0.299989		32342131	8775792	0.271342		27630398	10254871	0.371145			Vehicle
	39695318	13881773	0.349708		34530941	11205801	0.324515		56044051	14072759	0.251102		27006608	10154610	0.376005		31042318	8345854	0.268854		36772827	12739825	0.346447		34255668	12348466	0.360479		14869714	9494994	0.638546		19382894	8111893	0.418508		28576485	9458758	0.330998		20526708	10164475	0.495183			tdtomato	phosphoPKA	ratio
	35802966	14047458	0.392355		34293406	11061798	0.322563		18387548	8748483	0.475783		24459801	9307740	0.380532		10019381	7035880	0.702227		32760914	12814721	0.391159		39943724	12517102	0.313368		22787201	18412870	0.808036		23210999	10056822	0.433278		38350643	9656392	0.251792		38350643	9656392	0.251792			6508941	2360787	0.362699
	37135960	13834240	0.372529		27799050	9741921	0.350441		22613568	10472167	0.463092		27686280	9227407	0.333284		20281299	7907059	0.389869		37409441	12374172	0.330777		35354356	11321623	0.320233		21666304	18101261	0.835457		28141168	9378595	0.33327		37984712	9107706	0.239773		28432533	9868752	0.347094			6677671	2434670	0.364599
	29714592	13196285	0.444101		42885790	11193488	0.261007		19263883	8459623	0.439144		11205992	8313732	0.741901		28076998	9000865	0.320578		42541970	13256904	0.311619		38671663	11826846	0.305827		19216087	18125830	0.943263		18992671	8489554	0.446991		35483410	10154994	0.28619		26241787	9570012	0.364686			7591289	4379159	0.576866
	35461847	14312023	0.403589		43377235	11989333	0.276397		24756885	9488462	0.383266		22460722	11046777	0.491826		18343299	7503655	0.409068		39515478	12934712	0.327333		43588555	13097855	0.300488		24777100	10103402	0.407772		28156925	8915334	0.31663		39732623	10701175	0.26933		30850547	12602844	0.408513			8091718	1626689	0.201031
	26008697	7662445	0.294611		43118391	13964555	0.323865		17144287	10510995	0.61309		20050560	10770891	0.537187		37252020	10203340	0.2739		42536559	13564044	0.31888		45632236	10205547	0.223648		20076397	15871123	0.790536		23970602	8079913	0.337076		30037942	10055401	0.334757		34127817	18847276	0.552256			5379677	1120839	0.208347
	30074996	8200607	0.272672		38496104	11529555	0.299499		30442987	9206044	0.302403		22537728	10997189	0.487946		28603390	5601443	0.195831		33806639	11067474	0.327376		38964413	9428875	0.241987		18015152	9772687	0.54247		28303048	9831019	0.347348		31458208	10449056	0.332157		29822811	11919477	0.399677			12242422	4969175	0.405898
	33770728	8413468	0.249135		17513035	9947081	0.567982		23154669	5012346	0.216472		7932633	9902430	1.24832		20589099	4056679	0.19703		17435570	11047967	0.633645		26479054	6666942	0.251782		17956071	11017430	0.613577		28576734	9928903	0.347447		22811468	10307971	0.451877		37662012	9454051	0.251024			11550260	4961407	0.429549
	22588553	11092083	0.491049		12575161	9770485	0.776967		33569014	6901443	0.20559		7107262	10284241	1.447		30465374	10554020	0.346427		16450159	10787998	0.655799		40857037	10547441	0.258155		27327536	11514622	0.421356						24212642	10766361	0.444659		28412020	5641238	0.198551			10891417	5124600	0.470517
	26866030	9707488	0.361329		11306967	8701017	0.769527						14833706	12323341	0.830766						10125702	10227568	1.01006						17220001	10695913	0.621133						31938356	10259628	0.321232							8216449	4755168	0.578738
	29237019	10492431	0.358875		14045132	9370206	0.66715						19191981	12770528	0.66541						47709073	9440751	0.197882						16333743	11094045	0.67921						26909159	8903658	0.330878							10518496	4983677	0.473801
					26856768	10610016	0.395059						23729706	15112427	0.636857						46768109	9198347	0.19668						12260304	10239796	0.835199						24782664	9690568	0.391022							9667221	2746124	0.284066
													18672904	14390520	0.770663																															10599729	2937851	0.277163
																																														11360440	6382108	0.561784
																																														11291078	6544986	0.57966
	ANOVA summary																																													9883996	2938397	0.297288
	F	7.389																																												11606139	5657250	0.487436
	P value	<0.0001																																												8201327	1044721	0.127384
	P value summary	****																																												8597634	4910135	0.571103
	Significant diff. among means (P < 0.05)?	Yes																																												8642437	4940194	0.57162
	R squared	0.3891																																												7422111	1751092	0.235929
	Tukey's multiple comparisons test	Mean Diff.	95.00% CI of diff.	Significant?	Summary	Adjusted P Value
	Negative control vs. Negative control with Gs	-0.07486	-0.3016 to 0.1519	No	ns	0.9913																																								ANOVA summary
	Negative control vs. Negative control with Gs/PDE	-0.007999	-0.2506 to 0.2346	No	ns	>0.9999																																								F	58.45
	Negative control vs. Lphn3 with Gs	-0.3001	-0.5229 to -0.07721	Yes	**	0.0011																																								P value	<0.0001
	Negative control vs. Lphn3 with Gs/PDE	0.02399	-0.2186 to 0.2666	No	ns	>0.9999																																								P value summary	****
	Negative control vs. T4L Lphn3 with Gs	-0.04842	-0.2752 to 0.1784	No	ns	0.9998																																								Significant diff. among means (P < 0.05)?	Yes
	Negative control vs. T4L Lphn3 with Gs/PDE	0.07207	-0.1705 to 0.3146	No	ns	0.9962																																								R squared	0.7773
	Negative control vs. Lphn2 with Gs	-0.3239	-0.5507 to -0.09714	Yes	***	0.0004
	Negative control vs. Lphn2 with Gs/PDE	-0.003174	-0.2530 to 0.2466	No	ns	>0.9999																																								Tukey's multiple comparisons test	Mean Diff.	95.00% CI of diff.	Significant?
	Negative control vs. T4L Lphn2 with Gs	0.03395	-0.1928 to 0.2607	No	ns	>0.9999																																								Vehicle vs. 2.5mins FSK/IBMX	-1.223	-1.557 to -0.8892	Yes
	Negative control vs. T4L Lphn2 with Gs/PDE	-0.002659	-0.2452 to 0.2399	No	ns	>0.9999																																								Vehicle vs. 5 mins FSK/IBMX	-1.099	-1.422 to -0.7770	Yes
	Negative control with Gs vs. Negative control with Gs/PDE	0.06686	-0.1714 to 0.3051	No	ns	0.9976																																								Vehicle vs. 15 mins FSK/IBMX	-1.219	-1.504 to -0.9352	Yes
	Negative control with Gs vs. Lphn3 with Gs	-0.2252	-0.4434 to -0.007012	Yes	*	0.0369																																								Vehicle vs. 30 mins FSK/IBMX	-1.202	-1.473 to -0.9321	Yes
	Negative control with Gs vs. Lphn3 with Gs/PDE	0.09886	-0.1394 to 0.3371	No	ns	0.9549																																								2.5mins FSK/IBMX vs. 5 mins FSK/IBMX	0.1239	-0.2584 to 0.5063	No
	Negative control with Gs vs. T4L Lphn3 with Gs	0.02644	-0.1958 to 0.2486	No	ns	>0.9999																																								2.5mins FSK/IBMX vs. 15 mins FSK/IBMX	0.003856	-0.3470 to 0.3547	No
	Negative control with Gs vs. T4L Lphn3 with Gs/PDE	0.1469	-0.09135 to 0.3852	No	ns	0.6321																																								2.5mins FSK/IBMX vs. 30 mins FSK/IBMX	0.02082	-0.3189 to 0.3605	No
	Negative control with Gs vs. Lphn2 with Gs	-0.2491	-0.4713 to -0.02686	Yes	*	0.015																																								5 mins FSK/IBMX vs. 15 mins FSK/IBMX	-0.1201	-0.4598 to 0.2197	No
	Negative control with Gs vs. Lphn2 with Gs/PDE	0.07169	-0.1740 to 0.3173	No	ns	0.9967																																								5 mins FSK/IBMX vs. 30 mins FSK/IBMX	-0.1031	-0.4313 to 0.2251	No
	Negative control with Gs vs. T4L Lphn2 with Gs	0.1088	-0.1134 to 0.3310	No	ns	0.8758																																								15 mins FSK/IBMX vs. 30 mins FSK/IBMX	0.01696	-0.2740 to 0.3079	No
	Negative control with Gs vs. T4L Lphn2 with Gs/PDE	0.0722	-0.1661 to 0.3105	No	ns	0.9956
	Negative control with Gs/PDE vs. Lphn3 with Gs	-0.2921	-0.5266 to -0.05752	Yes	**	0.0037
	Negative control with Gs/PDE vs. Lphn3 with Gs/PDE	0.03199	-0.2214 to 0.2853	No	ns	>0.9999
	Negative control with Gs/PDE vs. T4L Lphn3 with Gs	-0.04043	-0.2787 to 0.1979	No	ns	>0.9999
	Negative control with Gs/PDE vs. T4L Lphn3 with Gs/PDE	0.08007	-0.1733 to 0.3334	No	ns	0.9938
	Negative control with Gs/PDE vs. Lphn2 with Gs	-0.3159	-0.5542 to -0.07764	Yes	**	0.0014
	Negative control with Gs/PDE vs. Lphn2 with Gs/PDE	0.004825	-0.2555 to 0.2651	No	ns	>0.9999
	Negative control with Gs/PDE vs. T4L Lphn2 with Gs	0.04195	-0.1963 to 0.2802	No	ns	>0.9999
	Negative control with Gs/PDE vs. T4L Lphn2 with Gs/PDE	0.00534	-0.2480 to 0.2587	No	ns	>0.9999
	Lphn3 with Gs vs. Lphn3 with Gs/PDE	0.3241	0.08951 to 0.5586	Yes	***	0.0007
	Lphn3 with Gs vs. T4L Lphn3 with Gs	0.2516	0.03345 to 0.4698	Yes	*	0.0106
	Lphn3 with Gs vs. T4L Lphn3 with Gs/PDE	0.3721	0.1376 to 0.6067	Yes	****	<0.0001
	Lphn3 with Gs vs. Lphn2 with Gs	-0.02385	-0.2420 to 0.1943	No	ns	>0.9999
	Lphn3 with Gs vs. Lphn2 with Gs/PDE	0.2969	0.05486 to 0.5389	Yes	**	0.0046
	Lphn3 with Gs vs. T4L Lphn2 with Gs	0.334	0.1158 to 0.5522	Yes	****	<0.0001
	Lphn3 with Gs vs. T4L Lphn2 with Gs/PDE	0.2974	0.06286 to 0.5320	Yes	**	0.0028
	Lphn3 with Gs/PDE vs. T4L Lphn3 with Gs	-0.07242	-0.3107 to 0.1659	No	ns	0.9955
	Lphn3 with Gs/PDE vs. T4L Lphn3 with Gs/PDE	0.04808	-0.2053 to 0.3014	No	ns	>0.9999
	Lphn3 with Gs/PDE vs. Lphn2 with Gs	-0.3479	-0.5862 to -0.1096	Yes	***	0.0002
	Lphn3 with Gs/PDE vs. Lphn2 with Gs/PDE	-0.02717	-0.2875 to 0.2331	No	ns	>0.9999
	Lphn3 with Gs/PDE vs. T4L Lphn2 with Gs	0.009953	-0.2283 to 0.2482	No	ns	>0.9999
	Lphn3 with Gs/PDE vs. T4L Lphn2 with Gs/PDE	-0.02665	-0.2800 to 0.2267	No	ns	>0.9999
	T4L Lphn3 with Gs vs. T4L Lphn3 with Gs/PDE	0.1205	-0.1178 to 0.3588	No	ns	0.852
	T4L Lphn3 with Gs vs. Lphn2 with Gs	-0.2755	-0.4977 to -0.05330	Yes	**	0.004
	T4L Lphn3 with Gs vs. Lphn2 with Gs/PDE	0.04525	-0.2004 to 0.2909	No	ns	>0.9999
	T4L Lphn3 with Gs vs. T4L Lphn2 with Gs	0.08237	-0.1398 to 0.3046	No	ns	0.9793
	T4L Lphn3 with Gs vs. T4L Lphn2 with Gs/PDE	0.04577	-0.1925 to 0.2840	No	ns	>0.9999
	T4L Lphn3 with Gs/PDE vs. Lphn2 with Gs	-0.396	-0.6343 to -0.1577	Yes	****	<0.0001
	T4L Lphn3 with Gs/PDE vs. Lphn2 with Gs/PDE	-0.07525	-0.3355 to 0.1850	No	ns	0.997
	T4L Lphn3 with Gs/PDE vs. T4L Lphn2 with Gs	-0.03813	-0.2764 to 0.2002	No	ns	>0.9999
	T4L Lphn3 with Gs/PDE vs. T4L Lphn2 with Gs/PDE	-0.07473	-0.3281 to 0.1786	No	ns	0.9964
	Lphn2 with Gs vs. Lphn2 with Gs/PDE	0.3207	0.07509 to 0.5664	Yes	**	0.0018
	Lphn2 with Gs vs. T4L Lphn2 with Gs	0.3579	0.1357 to 0.5801	Yes	****	<0.0001
	Lphn2 with Gs vs. T4L Lphn2 with Gs/PDE	0.3213	0.08298 to 0.5595	Yes	**	0.0011
	Lphn2 with Gs/PDE vs. T4L Lphn2 with Gs	0.03712	-0.2085 to 0.2828	No	ns	>0.9999
	Lphn2 with Gs/PDE vs. T4L Lphn2 with Gs/PDE	0.0005146	-0.2598 to 0.2608	No	ns	>0.9999
	T4L Lphn2 with Gs vs. T4L Lphn2 with Gs/PDE	-0.03661	-0.2749 to 0.2017	No	ns	>0.9999
[truncated: 45 more columns]
