# Supplementary material for: Latrophilin GPCR signaling mediates synapse formation
Source: eLife. 2021 Mar 1;10:e65717. doi: 10.7554/eLife.65717 (PMC7954527; doi:10.7554/eLife.65717)
Supplement: Figure 3—source data 1. [file elife-65717-fig3-data1.xlsx]

## Sheet: Sheet1
																	deltaCre				CRE				WT Rescue				T4L rescue				ECD rescue				deltaCt rescue
	Figure 3A								Figure 3C								5.10156	0.000352485			8.5	0.00047081			1.10938	0.000692521			11.8125	0.000896861			6.60156	0.000851064			8.5	0.000738007			Figure 3D
																	5.70312	0.00070497			9.20117	0.00094162			2.10938	0.00138504			11.9023	0.00179372			8.19531	0.00170213			9.59375	0.00147601											deltaCre
	excitatory synapse density								mEPSC Frequency (Hz)								6.80469	0.00105746			10.5	0.00141243			8.90625	0.00207756			13.1875	0.00269058			8.19531	0.00255319			9.89844	0.00221402			mEPSC amplitude (pA)								-5.0006
	deltacre	cre	wt rescue	t4l rescue	gpi rescue	deltalat rescue			deltacre	cre	wt rescue	t4l rescue	gpi rescue	deltalat rescue			7	0.00140994			11.1016	0.00188324			9.40625	0.00277008			13.5	0.00358744			10.7031	0.00340426			10.5	0.00295203			deltacre	cre	wt rescue	t4l rescue	ECD rescue	deltaCt rescue			-5.00157
	0.961381	0.18697	1.40806	0.685337	0.27635	1.06944			2.10909	1.51213	1.09959	1.62363	1.26432	3.4627			7.60156	0.00176243			12.5938	0.00235405			10.0938	0.0034626			14.4062	0.0044843			10.8984	0.00425532			10.6016	0.00369004			26	14	10.88	24.31	37.72	25.43			-5.01219
	1.24706	0.885383	1.00845	0.531574	0.326082	0.705477			3.60079	1.05233	2.22783	2.88214	1.02712	2.55977			8.10156	0.00211491			12.7031	0.00282486			12.1016	0.00415512			14.8125	0.00538117			11	0.00510638			13.3906	0.00442804			10.83	26.45	37.32	11.98	30.24	22.09			-5.03838
	0.696958	1.31606	0.890734	0.290325	0.546843	0.265205			2.75793	0.551724	5.19469	1.61693	0.89153	2.92716			8.60156	0.0024674			13.0938	0.00329567			12.5938	0.00484765			15	0.00627803			11	0.00595745			13.9023	0.00516605			25.7	15.96	22.08	17.1	14.35	16.54			-5.04622
	0.919111	0.388914	0.649059	0.281506	0.303695	0.0893405			6.34231	0.748026	5.55324	1.60552	2.17391	2.95798			8.79688	0.00281988			13.3984	0.00376648			12.8984	0.00554017			15.0938	0.00717489			12.3047	0.00680851			14.7031	0.00590406			14.14	10.23	24.26	14.32	15.03	12.04			-5.05384
	1.28836	1.10431	0.664802	0.490985	0.240675	1.28531			2.02371	3.22886	2.47903	2.85207	1.07252	1			8.89844	0.00317237			13.6016	0.00423729			13.0938	0.00623269			15.2188	0.00807175			12.5977	0.00765957			15.1016	0.00664207			16.09	19.72	11.74	14.98	11.49	12.77			-5.06084
	0.867847	0.406829	1.49554	0.696252	0.592171	0.398911			4.19907	1.66434	3.03556	1.42933	3.06501	3.91824			9.10156	0.00352485			13.7031	0.0047081			13.1016	0.00692521			15.4062	0.00896861			13.3008	0.00851064			15.3906	0.00738007			17.12	12.08	16.75	19.76	14.5	30.26			-5.09559
	0.528189	0.32846	0.942662	0.231448	0.14026	0.904978			1.72217	0.369458	4.74488	1.2611	2.59434	1.22382			9.39844	0.00387734			13.7812	0.00517891			13.2969	0.00761773			15.5938	0.00986547			13.5	0.0093617			16	0.00811808			20.95	24.24	14.05	18.38	12.03	23.28			-5.11362
	1.20703	0.748753	1.06779	0.90809	0.344635	1.36651			1.51294	1.47289	11.2746	1.7158	0.864553	3.04525			9.39844	0.00422982			13.8906	0.00564972			13.2969	0.00831025			15.7188	0.0107623			13.5	0.0102128			16.2031	0.00885609			36.29	11.59	12.68	16.14	17.49	11.31			-5.11864
	1.20245	0.788965	1.29509	0.696862	0.383484	0.911157			5.85987	0.619631	1.96842	1.55159	3.9	1.65172			9.40625	0.00458231			14.4062	0.00612053			13.3047	0.00900277			15.9062	0.0116592			13.6016	0.0110638			16.3008	0.0095941			14.27	13.37	28.56	14.84	18.17	12.08			-5.13079
	1.29127	0.349023	1.32317	0.588275	0.183006	0.897051			5.4771	1.19257	4.93543	3.60033	3.15505	3.81641			9.5	0.00493479			14.5938	0.00659134			13.5	0.00969529			16.3125	0.0125561			13.6016	0.0119149			16.4062	0.0103321			20.2	14.98	12.36	41.67	9.98	10.02			-5.14434
	0.856204	0.934916	1.21897	0.500176	0.180743	0.757005			1.70025	3.88466	4.5086	2.43478	1.57702	0.898127			9.79688	0.00528728			14.6875	0.00706215			13.6953	0.0103878			16.4062	0.0134529			13.6992	0.012766			17.3008	0.0110701			23.67	17.82	19.98	16.87	13.87	25.19			-5.14688
	1.00816	0.568603	1.41432	0.555548	0.336246	1.04067			3.44481	0.26385	1.48029	4.83204	3.98697	4.97915			10.1016	0.00563976			14.9062	0.00753296			14.0938	0.0110803			16.7031	0.0143498			13.8984	0.013617			17.3984	0.0118081			16.38	14.43	17.48	15.87	20.13	39.42			-5.14801
	1.48325	1.09623	1.29358	0.61129	0.395852	1.139			4.55605	1.1987	5.1186	1.74971	1.65871	2.85653			10.3008	0.00599225			14.9062	0.00800377			14.0938	0.0117729			17.0938	0.0152466			14.0977	0.0144681			17.4062	0.0125461			11.86	7.52	8.75	34	13.1	18.06			-5.15593
	1.36615	1.47207	1.05843	0.798848	0.587808	0.903587			1.81185	1.07935	3.47333	1.94742	0.541413	0.830335			10.6016	0.00634473			15.1875	0.00847458			14.2031	0.0124654			17.4062	0.0161435			14.1016	0.0153191			18.3008	0.0132841			32.91	4.93	28.75	21.32	9.78	15.66			-5.16935
	1.275	0.376975	1.30188	0.441559	0.982591	1.00353			7.93333	0.42987	3.88451	0.842912	0.961924	1.44399			10.7002	0.00669722			15.2969	0.00894539			14.2031	0.0131579			17.5	0.0170404			14.6992	0.0161702			18.8008	0.0140221			11.57	11.96	19.37	19.23	21.52	14.75			-5.17349
	0.487262	0.761119	0.430709	0.276268	0.472637	1.14575			6.05086	0.57877	6.4273	0.259782	1.1539	0.724638			11	0.0070497			15.625	0.0094162			14.5	0.0138504			17.5938	0.0179372			14.8008	0.0170213			19.6016	0.0147601			8.56	9.84	17.7	16.72	17.56	8.78			-5.20199
	1.40268	0.497163	1.59981	0.687091	0.812079	0.233907			8.99248	2.72976	1.45588	1.86324	1.66565	2.19648			11.1016	0.00740219			16.0938	0.00988701			14.6016	0.0145429			17.625	0.0188341			14.8047	0.0178723			19.8125	0.0154982			12.41	8.47	15.26	16.12	9.97	13.54			-5.20586
	0.708736	0.525745	0.895239	0.378956	0.786716	0.499974			1.92821	6.77194	8.17857	4.8845	2.03927	2.88668			11.1953	0.00775467			16.2031	0.0103578			14.8906	0.0152355			17.8125	0.0197309			14.9023	0.0187234			20.1094	0.0162362			14.92	25.5	15.5	12.73	16.39	18.21			-5.21557
	0.660746	1.36446	1.03609	1.00709	0.17781	0.501569			1.83128	6.14095	4.5		5.96108	0.850149			11.3125	0.00810716			16.2031	0.0108286			14.9062	0.015928			18	0.0206278			15.1016	0.0195745			20.3008	0.0169742			12.53	25.63	23.61		28.53	12.2			-5.22235
	0.258604	0.414773	0.842952	0.403672	0.297588	0.731577			3.11758	7.35119							12	0.00845964			16.4375	0.0112994			15	0.0166205			18.0938	0.0215247			15.1992	0.0204255			20.7031	0.0177122			24	36.64							-5.23847
	1.03586	0.679529	0.901834	0.757988	0.475875	0.56843			8.32159								12.0938	0.00881213			16.6953	0.0117702			15	0.017313			18.125	0.0224215			15.3008	0.0212766			20.7031	0.0184502			11.59								-5.27241
	1.41228	0.452528	1.2561	0.527778	0.228302	0.272379			5.29895								12.1016	0.00916461			16.9062	0.0122411			15.0938	0.0180055			18.2031	0.0233184			15.5	0.0221277			21.5977	0.0191882			13.36								-5.27646
	0.801567	0.320801	1.53768	0.650168	1.28284	0.40225											12.1016	0.0095171			17.1875	0.0127119			15.1016	0.0186981			18.4062	0.0242152			15.5977	0.0229787			21.7812	0.0199262											-5.27683
	1.10092	0.327781	1.00428	0.205684	0.405798	0.539687			ANOVA summary								12.1953	0.00986958			17.4062	0.0131827			15.1016	0.0193906			18.4062	0.0251121			15.8008	0.0238298			21.7969	0.0206642			ANOVA summary								-5.28972
	0.376455	0.25047	0.739796	0.98465	0.240193	0.338338			F	5.886							12.2188	0.0102221			17.7031	0.0136535			15.2969	0.0200831			18.5	0.026009			15.8008	0.0246809			21.8984	0.0214022			F	0.3636							-5.29579
	1.1122	0.478499	1.45687	0.438502	0.465012	0.424389			P value	<0.0001							12.2969	0.0105746			17.7969	0.0141243			15.3125	0.0207756			18.9062	0.0269058			15.8984	0.0255319			22	0.0221402			P value	0.8725							-5.31393
	0.512972	0.230124	0.549833	0.0663288	0.175004	0.365926			P value summary	****							12.2969	0.010927			17.7969	0.0145951			15.3999	0.0214681			19	0.0278027			15.9062	0.026383			22	0.0228782			P value summary	ns							-5.32438
	0.614018	0.36693	1.81784	0.563543	0.924746	0.378442			Significant diff. among means (P < 0.05)?	Yes							12.2969	0.0112795			18.0938	0.0150659			15.5938	0.0221607			19.0938	0.0286996			16.2031	0.027234			22.1992	0.0236162			Significant diff. among means (P < 0.05)?	No							-5.32468
	1.53566	0.475855	1.03966	0.426329	0.624481	0.395981			R squared	0.2096							12.3047	0.011632			18.3984	0.0155367			15.7969	0.0228532			19.1016	0.0295964			16.2031	0.0280851			22.7969	0.0243542			R squared	0.01612							-5.36194
	0.898	0.331626	1.88099	0.534598	1.23174	0.478459											12.3047	0.0119845			18.4062	0.0160075			15.8984	0.0235457			19.4062	0.0304933			16.3984	0.0289362			23.6016	0.0250923											-5.36522
		0.845931			1.28108				Tukey's multiple comparisons test	Mean Diff.	95.00% CI of diff.	Significant?	Summary	Adjusted P Value			12.6875	0.012337			18.7031	0.0164783			16	0.0242382			19.5938	0.0313901			16.6953	0.0297872			24.2031	0.0258303			Tukey's multiple comparisons test	Mean Diff.	95.00% CI of diff.	Significant?	Summary	Adjusted P Value			-5.37927
									deltacre vs. cre	1.976	0.2468 to 3.705	Yes	*	0.0153			12.6953	0.0126895			19	0.0169492			16.1016	0.0249307			19.7188	0.032287			16.7031	0.0306383			24.3125	0.0265683			deltacre vs. cre	1.702	-5.092 to 8.497	No	ns	0.9783			-5.39145
									deltacre vs. wt rescue	-0.1738	-1.926 to 1.579	No	ns	0.9997			12.7969	0.0130419			19.1016	0.01742			16.1953	0.0256233			20.1875	0.0331839			16.7969	0.0314894			24.6992	0.0273063			deltacre vs. wt rescue	-0.8232	-7.711 to 6.064	No	ns	0.9993			-5.39178
	ANOVA summary								deltacre vs. t4l rescue	1.954	0.1752 to 3.732	Yes	*	0.0225			12.8008	0.0133944			19.3125	0.0178908			16.4023	0.0263158			20.2812	0.0340807			16.8984	0.0323404			25	0.0280443			deltacre vs. t4l rescue	-1.271	-8.260 to 5.719	No	ns	0.995			-5.39592
	F	17.63							deltacre vs. gpi rescue	2.036	0.2834 to 3.789	Yes	*	0.013			12.8047	0.0137469			19.3984	0.0183616			16.5	0.0270083			20.2969	0.0349776			17	0.0331915			25.0977	0.0287823			deltacre vs. ECD rescue	0.5047	-6.383 to 7.392	No	ns	>0.9999			-5.40664
	P value	<0.0001							deltacre vs. deltalat rescue	1.79	0.03734 to 3.543	Yes	*	0.0424			12.9023	0.0140994			19.5	0.0188324			16.5938	0.0277008			20.3125	0.0358744			17.2031	0.0340426			25.2031	0.0295203			deltacre vs. deltaCt rescue	-0.01007	-6.897 to 6.877	No	ns	>0.9999			-5.41389
	P value summary	****							cre vs. wt rescue	-2.15	-3.942 to -0.3568	Yes	**	0.0092			13	0.0144519			19.5625	0.0193032			16.7031	0.0283934			20.3984	0.0367713			17.3008	0.0348936			25.7969	0.0302583			cre vs. wt rescue	-2.526	-9.571 to 4.519	No	ns	0.9034			-5.43271
	Significant diff. among means (P < 0.05)?	Yes							cre vs. t4l rescue	-0.022	-1.840 to 1.796	No	ns	>0.9999			13	0.0148044			20	0.019774			16.7969	0.0290859			20.5	0.0376682			17.3008	0.0357447			26.1094	0.0309963			cre vs. t4l rescue	-2.973	-10.12 to 4.172	No	ns	0.8327			-5.43468
	R squared	0.3337							cre vs. gpi rescue	0.06025	-1.733 to 1.853	No	ns	>0.9999			13.1016	0.0151569			20	0.0202448			16.7998	0.0297784			20.5938	0.038565			17.3984	0.0365957			26.2031	0.0317343			cre vs. ECD rescue	-1.198	-8.243 to 5.847	No	ns	0.9963			-5.44269
									cre vs. deltalat rescue	-0.1858	-1.979 to 1.607	No	ns	0.9997			13.1953	0.0155093			20.1094	0.0207156			16.9062	0.0304709			20.6992	0.0394619			17.8008	0.0374468			26.375	0.0324723			cre vs. deltaCt rescue	-1.713	-8.758 to 5.333	No	ns	0.981			-5.44959
	Tukey's multiple comparisons test	Mean Diff.	95.00% CI of diff.	Significant?	Summary	Adjusted P Value			wt rescue vs. t4l rescue	2.128	0.2869 to 3.968	Yes	*	0.0137			13.2031	0.0158618			20.3906	0.0211864			17.8999	0.0311634			20.7812	0.0403587			18.1016	0.0382979			26.4062	0.0332103			wt rescue vs. t4l rescue	-0.4474	-7.681 to 6.786	No	ns	>0.9999			-5.45014
	deltacre vs. cre	0.3487	0.1036 to 0.5939	Yes	***	0.0009			wt rescue vs. gpi rescue	2.21	0.3942 to 4.025	Yes	**	0.0078			13.2031	0.0162143			20.6016	0.0216573			18	0.031856			20.9062	0.0412556			18.2188	0.0391489			26.5938	0.0339483			wt rescue vs. ECD rescue	1.328	-5.807 to 8.463	No	ns	0.9944			-5.45266
	deltacre vs. wt rescue	-0.1635	-0.4107 to 0.08365	No	ns	0.4018			wt rescue vs. deltalat rescue	1.964	0.1481 to 3.779	Yes	*	0.026			13.3125	0.0165668			20.7031	0.0221281			18.0938	0.0325485			20.9062	0.0421525			18.2969	0.04			27.1875	0.0346863			wt rescue vs. deltaCt rescue	0.8132	-6.322 to 7.948	No	ns	0.9995			-5.45509
	deltacre vs. t4l rescue	0.43	0.1828 to 0.6772	Yes	****	<0.0001			t4l rescue vs. gpi rescue	0.08224	-1.758 to 1.923	No	ns	>0.9999			13.4004	0.0169193			20.7969	0.0225989			18.3008	0.033241			21.0938	0.0430493			18.3047	0.0408511			27.375	0.0354244			t4l rescue vs. ECD rescue	1.775	-5.458 to 9.009	No	ns	0.9802			-5.48436
	deltacre vs. gpi rescue	0.464	0.2188 to 0.7092	Yes	****	<0.0001			t4l rescue vs. deltalat rescue	-0.1638	-2.004 to 1.677	No	ns	0.9998			13.5	0.0172718			20.875	0.0230697			18.4062	0.0339335			21.1016	0.0439462			18.4004	0.0417021			27.6953	0.0361624			t4l rescue vs. deltaCt rescue	1.261	-5.973 to 8.494	No	ns	0.9959			-5.50157
	deltacre vs. deltalat rescue	0.3034	0.05622 to 0.5506	Yes	**	0.0068			gpi rescue vs. deltalat rescue	-0.246	-2.062 to 1.570	No	ns	0.9988			13.5938	0.0176243			20.8984	0.0235405			18.5	0.034626			21.2969	0.044843			18.5977	0.0425532			27.6992	0.0369004			ECD rescue vs. deltaCt rescue	-0.5147	-7.650 to 6.620	No	ns	>0.9999			-5.54169
	cre vs. wt rescue	-0.5123	-0.7575 to -0.2671	Yes	****	<0.0001											13.6016	0.0179767			21.1016	0.0240113			18.6094	0.0353186			21.5938	0.0457399			18.6016	0.0434043			27.8008	0.0376384											-5.56033
	cre vs. t4l rescue	0.08124	-0.1639 to 0.3264	No	ns	0.9313											13.6016	0.0183292			21.2969	0.0244821			18.6992	0.0360111			21.875	0.0466368			18.8008	0.0442553			27.8125	0.0383764											-5.56173
	cre vs. gpi rescue	0.1153	-0.1279 to 0.3584	No	ns	0.7473											13.8984	0.0186817			21.5938	0.0249529			18.7969	0.0367036			22	0.0475336			18.8008	0.0451064			28.8008	0.0391144											-5.56693
	cre vs. deltalat rescue	-0.04534	-0.2905 to 0.1998	No	ns	0.9948											13.9004	0.0190342			21.7031	0.0254237			18.7969	0.0373961			22	0.0484305			18.8984	0.0459574			28.9062	0.0398524											-5.56981
	wt rescue vs. t4l rescue	0.5935	0.3463 to 0.8407	Yes	****	<0.0001											14	0.0193867			21.8008	0.0258945			18.875	0.0380886			22.0938	0.0493274			19	0.0468085			30.1016	0.0405904											-5.58401
	wt rescue vs. gpi rescue	0.6275	0.3824 to 0.8727	Yes	****	<0.0001											14	0.0197392			22	0.0263653			19.0938	0.0387812			22.125	0.0502242			19	0.0476596			30.9062	0.0413284											-5.59056
	wt rescue vs. deltalat rescue	0.4669	0.2198 to 0.7141	Yes	****	<0.0001											14.1016	0.0200916			22.0938	0.0268362			19.2031	0.0394737			22.6875	0.0511211			19	0.0485106			31.2031	0.0420664											-5.59188
	t4l rescue vs. gpi rescue	0.03403	-0.2111 to 0.2792	No	ns	0.9987											14.1016	0.0204441			22.2031	0.027307			19.2969	0.0401662			23	0.0520179			19.0938	0.0493617			31.6992	0.0428044											-5.59296
	t4l rescue vs. deltalat rescue	-0.1266	-0.3738 to 0.1206	No	ns	0.6803											14.3984	0.0207966			22.9062	0.0277778			19.7969	0.0408587			23.6875	0.0529148			19.7969	0.0502128			31.7969	0.0435424											-5.59647
	gpi rescue vs. deltalat rescue	-0.1606	-0.4058 to 0.08456	No	ns	0.4132											14.3984	0.0211491			23	0.0282486			20	0.0415512			23.8125	0.0538117			20.0996	0.0510638			31.9062	0.0442804											-5.60217
																	14.5996	0.0215016			23.1953	0.0287194			20.1016	0.0422438			24.3125	0.0547085			20.1992	0.0519149			32.2188	0.0450185											-5.60266
																	14.6016	0.0218541			23.3984	0.0291902			20.2969	0.0429363			24.6875	0.0556054			20.3008	0.052766			32.3125	0.0457565											-5.61668
																	14.6953	0.0222066			23.4062	0.029661			20.2969	0.0436288			24.7969	0.0565022			20.5938	0.053617			33.5938	0.0464945											-5.62047
																	14.6992	0.022559			23.5	0.0301318			20.5	0.0443213			24.8125	0.0573991			20.5938	0.0544681			33.7031	0.0472325											-5.63757
																	14.7031	0.0229115			23.5	0.0306026			20.6094	0.0450139			24.8125	0.058296			21.1016	0.0553191			34	0.0479705											-5.63871
																	14.7031	0.023264			23.5977	0.0310734			20.6094	0.0457064			25	0.0591928			21.2969	0.0561702			34.8047	0.0487085											-5.65193
																	14.7969	0.0236165			23.7031	0.0315443			20.7031	0.0463989			25.3047	0.0600897			22.3047	0.0570213			34.9062	0.0494465											-5.67046
																	14.7969	0.023969			23.7031	0.0320151			20.7812	0.0470914			25.5938	0.0609865			22.3984	0.0578723			35	0.0501845											-5.69067
																	14.8047	0.0243215			23.8984	0.0324859			20.8047	0.0477839			25.7812	0.0618834			22.4023	0.0587234			35	0.0509225											-5.69089
																	14.8984	0.024674			25.375	0.0329567			21	0.0484765			25.7812	0.0627803			22.7031	0.0595745			35.5938	0.0516605											-5.69826
																	14.8984	0.0250264			25.5	0.0334275			21	0.049169			25.875	0.0636771			22.875	0.0604255			35.5977	0.0523985											-5.70154
																	14.8984	0.0253789			26.2031	0.0338983			21.6016	0.0498615			25.9062	0.064574			22.8984	0.0612766			36.2031	0.0531365											-5.73669
																	14.9004	0.0257314			26.2969	0.0343691			21.6094	0.050554			26	0.0654709			22.9023	0.0621277			36.5938	0.0538745											-5.7407
																	15	0.0260839			26.3984	0.0348399			21.6953	0.0512465			26	0.0663677			23.0938	0.0629787			36.7031	0.0546125											-5.75155
																	15	0.0264364			26.5	0.0353107			22.2031	0.0519391			26	0.0672646			23.3047	0.0638298			36.8125	0.0553506											-5.77478
																	15.0938	0.0267889			26.5	0.0357815			22.4062	0.0526316			26.5938	0.0681614			23.5977	0.0646809			37	0.0560886											-5.77623
																	15.1016	0.0271413			26.6094	0.0362524			22.5	0.0533241			26.7188	0.0690583			23.6016	0.0655319			37.4062	0.0568266											-5.79192
																	15.125	0.0274938			27.5	0.0367232			22.6016	0.0540166			26.8125	0.0699552			23.8008	0.066383			38.7812	0.0575646											-5.79772
																	15.2031	0.0278463			27.5	0.037194			22.9062	0.0547091			26.8125	0.070852			23.8984	0.067234			38.7969	0.0583026											-5.79957
																	15.2188	0.0281988			27.6016	0.0376648			23	0.0554017			27.0938	0.0717489			24	0.0680851			38.8125	0.0590406											-5.80609
																	15.2969	0.0285513			28.1094	0.0381356			23.1016	0.0560942			27.2188	0.0726457			24.0977	0.0689362			40.4062	0.0597786											-5.81979
																	15.3008	0.0289038			28.2969	0.0386064			23.2969	0.0567867			27.3125	0.0735426			24.5	0.0697872			40.4062	0.0605166											-5.83973
																	15.3999	0.0292563			28.2969	0.0390772			23.2969	0.0574792			27.875	0.0744395			24.7969	0.0706383			40.5	0.0612546											-5.85866
																	15.6016	0.0296087			28.5	0.039548			23.3984	0.0581717			28.2812	0.0753363			24.8984	0.0714894			40.9023	0.0619926											-5.8925
																	15.7188	0.0299612			28.6016	0.0400188			23.4062	0.0588643			28.8125	0.0762332			25	0.0723404			41.0977	0.0627306											-5.8995
																	15.7969	0.0303137			28.7969	0.0404896			23.7969	0.0595568			29.0938	0.07713			25.3984	0.0731915			41.8008	0.0634686											-5.90078
																	16	0.0306662			28.8984	0.0409605			23.8906	0.0602493			29.5	0.0780269			25.5	0.0740426			41.9062	0.0642066											-5.91236
																	16	0.0310187			29	0.0414313			24.1953	0.0609418			29.7188	0.0789238			25.6016	0.0748936			42.4062	0.0649446											-5.91344
																	16	0.0313712			29.1016	0.0419021			24.2969	0.0616343			29.8125	0.0798206			25.7969	0.0757447			42.5938	0.0656827											-5.91701
																	16	0.0317237			29.3984	0.0423729			24.3906	0.0623269			29.8125	0.0807175			26	0.0765957			42.5938	0.0664207											-5.92442
																	16.0996	0.0320761			29.6875	0.0428437			24.3984	0.0630194			30.1875	0.0816143			26.2031	0.0774468			43	0.0671587											-5.94027
																	16.1016	0.0324286			29.7031	0.0433145			24.6953	0.0637119			30.3125	0.0825112			26.4004	0.0782979			43.2188	0.0678967											-5.94293
																	16.2031	0.0327811			30.2969	0.0437853			24.8125	0.0644044			30.4062	0.0834081			26.4023	0.0791489			43.3008	0.0686347											-5.95507
																	16.2969	0.0331336			30.4062	0.0442561			24.8906	0.065097			30.9062	0.0843049			26.5	0.08			43.375	0.0693727											-5.95535
																	16.5	0.0334861			30.6016	0.0447269			24.8984	0.0657895			31.0938	0.0852018			26.6016	0.0808511			43.5938	0.0701107											-5.96962
																	16.5	0.0338386			30.8047	0.0451977			24.9062	0.066482			31.2812	0.0860987			26.7969	0.0817021			43.7031	0.0708487											-5.97293
																	16.5996	0.034191			31.3984	0.0456685			25.0938	0.0671745			31.3125	0.0869955			27	0.0825532			43.7031	0.0715867											-5.99207
																	16.6016	0.0345435			31.5	0.0461394			25.1016	0.067867			31.375	0.0878924			27.3008	0.0834043			43.7812	0.0723247											-5.99619
																	16.6992	0.034896			31.5	0.0466102			25.3984	0.0685596			31.9062	0.0887892			27.6992	0.0842553			44	0.0730627											-6.00002
																	16.7031	0.0352485			31.9062	0.047081			25.5	0.0692521			31.9062	0.0896861			27.8008	0.0851064			44.2969	0.0738007											-6.01373
																	16.7969	0.035601			32.6016	0.0475518			25.5	0.0699446			32.1875	0.090583			28.3984	0.0859574			44.375	0.0745387											-6.01527
																	16.7998	0.0359535			32.6875	0.0480226			25.6016	0.0706371			32.1875	0.0914798			28.5977	0.0868085			44.4062	0.0752768											-6.03101
																	16.8984	0.036306			32.875	0.0484934			25.6016	0.0713296			32.3125	0.0923767			28.7031	0.0876596			44.6953	0.0760148											-6.03729
																	17	0.0366584			33.3047	0.0489642			25.7031	0.0720222			32.5	0.0932735			29	0.0885106			45.1953	0.0767528											-6.03875
																	17	0.0370109			33.3906	0.049435			25.7031	0.0727147			32.5	0.0941704			29.2031	0.0893617			45.2031	0.0774908											-6.06463
																	17	0.0373634			33.3984	0.0499058			26.2031	0.0734072			33.0938	0.0950673			29.2969	0.0902128			45.6035	0.0782288											-6.08636
																	17.1016	0.0377159			33.5	0.0503766			26.6016	0.0740997			33.375	0.0959641			29.3984	0.0910638			46.2031	0.0789668											-6.09124
																	17.1016	0.0380684			33.5938	0.0508475			26.6016	0.0747922			33.5	0.096861			29.7988	0.0919149			46.4062	0.0797048											-6.09772
																	17.2012	0.0384209			33.5938	0.0513183			26.6953	0.0754848			33.7188	0.0977578			30.2012	0.092766			46.5938	0.0804428											-6.10684
																	17.2031	0.0387734			33.8047	0.0517891			26.8984	0.0761773			34.3125	0.0986547			30.3984	0.093617			47.1875	0.0811808											-6.11409
																	17.2031	0.0391258			33.8984	0.0522599			27.0938	0.0768698			34.375	0.0995516			30.3984	0.0944681			47.2031	0.0819188											-6.12218
																	17.2031	0.0394783			33.9023	0.0527307			27.5938	0.0775623			35	0.100448			30.7969	0.0953191			47.4062	0.0826568											-6.1485
																	17.2969	0.0398308			34.0938	0.0532015			27.7969	0.0782548			35.1875	0.101345			31.1992	0.0961702			48.6035	0.0833948											-6.15183
																	17.2969	0.0401833			34.8125	0.0536723			27.8125	0.0789474			35.1875	0.102242			31.5	0.0970213			49	0.0841328											-6.16263
																	17.5	0.0405358			34.8984	0.0541431			28	0.0796399			35.7188	0.103139			31.7969	0.0978723			49.4062	0.0848708											-6.16557
																	17.5	0.0408883			35.0938	0.0546139			28.1875	0.0803324			35.875	0.104036			32.0977	0.0987234			49.6016	0.0856089											-6.18198
																	17.5	0.0412407			35.2031	0.0550847			28.1953	0.0810249			36.6016	0.104933			32.6016	0.0995745			49.7031	0.0863469											-6.18877
																	17.5	0.0415932			35.2969	0.0555556			28.2031	0.0817175			36.6992	0.10583			32.6992	0.100426			49.9062	0.0870849											-6.19813
																	17.5996	0.0419457			35.3008	0.0560264			28.2969	0.08241			37.0938	0.106726			32.8008	0.101277			50.0938	0.0878229											-6.20617
																	17.625	0.0422982			35.3047	0.0564972			28.375	0.0831025			37.0938	0.107623			32.8008	0.102128			50.1094	0.0885609											-6.20843
																	17.7031	0.0426507			35.3125	0.056968			28.5	0.083795			37.0938	0.10852			33.1992	0.102979			50.5938	0.0892989											-6.23391
																	17.8047	0.0430032			35.5	0.0574388			28.6016	0.0844875			37.2188	0.109417			33.3008	0.10383			50.5938	0.0900369											-6.23469
																	17.8125	0.0433557			35.6953	0.0579096			28.7969	0.0851801			37.4062	0.110314			33.7969	0.104681			51.7812	0.0907749											-6.24556
																	17.8984	0.0437081			35.8047	0.0583804			28.7969	0.0858726			37.5	0.111211			33.8008	0.105532			51.8125	0.0915129											-6.2637
																	17.8984	0.0440606			35.8125	0.0588512			28.8047	0.0865651			37.7031	0.112108			33.9023	0.106383			51.9023	0.0922509											-6.26865
																	17.8999	0.0444131			36.0938	0.059322			28.8125	0.0872576			37.9062	0.113004			34	0.107234			52.1875	0.0929889											-6.28213
																	18	0.0447656			36.2031	0.0597928			28.8906	0.0879501			38.0938	0.113901			34.1016	0.108085			52.207	0.0937269											-6.30236
																	18	0.0451181			36.3984	0.0602637			29.1953	0.0886427			39.0938	0.114798			34.3984	0.108936			52.6875	0.0944649											-6.30873
																	18	0.0454706			36.5	0.0607345			29.5	0.0893352			39.2188	0.115695			34.4023	0.109787			52.7813	0.095203											-6.31508
																	18	0.0458231			36.6875	0.0612053			29.7031	0.0900277			39.7969	0.116592			34.8008	0.110638			53	0.095941											-6.32889
																	18.1016	0.0461755			36.7031	0.0616761			30	0.0907202			39.8125	0.117489			34.8008	0.111489			53	0.096679											-6.33662
																	18.1016	0.046528			36.9062	0.0621469			30	0.0914127			39.9062	0.118386			34.9023	0.11234			53.1875	0.097417											-6.35423
																	18.1016	0.0468805			36.9062	0.0626177			30.1953	0.0921053			40.0938	0.119283			34.9023	0.113191			53.2188	0.098155											-6.37182
																	18.1953	0.047233			37.0938	0.0630885			30.2031	0.0927978			40.6094	0.120179			35.2969	0.114043			53.5	0.098893											-6.37831
																	18.1953	0.0475855			37.0938	0.0635593			30.5	0.0934903			40.6875	0.121076			35.4062	0.114894			53.8125	0.099631											-6.40382
																	18.2031	0.047938			37.2031	0.0640301			30.8125	0.0941828			40.7812	0.121973			35.6016	0.115745			54.2969	0.100369											-6.4323
																	18.2031	0.0482904			37.3984	0.0645009			30.8984	0.0948753			41.0938	0.12287			35.6992	0.116596			54.5938	0.101107											-6.43516
																	18.2969	0.0486429			38	0.0649718			30.9062	0.0955679			41.4062	0.123767			36.5	0.117447			54.6875	0.101845											-6.43622
																	18.3984	0.0489954			38.1016	0.0654426			31.0938	0.0962604			41.5	0.124664			37	0.118298			55	0.102583											-6.45356
																	18.5	0.0493479			38.2031	0.0659134			31.0938	0.0969529			41.8125	0.125561			37.1016	0.119149			55.1875	0.103321											-6.4626
																	18.5625	0.0497004			38.2969	0.0663842			31.2031	0.0976454			41.8906	0.126457			37.3984	0.12			55.5938	0.104059											-6.46558
																	18.5996	0.0500529			38.5	0.066855			31.2969	0.098338			41.9062	0.127354			37.4023	0.120851			55.9023	0.104797											-6.50831
																	18.6016	0.0504054			38.6875	0.0673258			31.3984	0.0990305			42.5938	0.128251			37.5996	0.121702			56.3008	0.105535											-6.50969
																	18.6953	0.0507578			38.7031	0.0677966			31.4062	0.099723			42.9062	0.129148			37.6992	0.122553			56.3906	0.106273											-6.5156
																	18.7031	0.0511103			39.1016	0.0682674			31.5	0.100416			43.0938	0.130045			37.7031	0.123404			56.6992	0.107011											-6.51811
																	18.875	0.0514628			39.3047	0.0687382			31.7969	0.101108			43.1875	0.130942			37.8008	0.124255			56.7969	0.107749											-6.52749
																	19	0.0518153			39.7188	0.069209			31.8047	0.101801			43.5	0.131839			38.1016	0.125106			56.8125	0.108487											-6.57093
																	19	0.0521678			39.7969	0.0696798			31.8984	0.102493			43.7031	0.132735			38.2969	0.125957			56.9062	0.109225											-6.5757
																	19	0.0525203			39.8125	0.0701507			31.8984	0.103186			43.9062	0.133632			38.7969	0.126809			57	0.109963											-6.59263
																	19	0.0528728			39.8984	0.0706215			32	0.103878			43.9062	0.134529			38.7969	0.12766			57.8008	0.110701											-6.59551
																	19.0938	0.0532252			40	0.0710923			32	0.104571			44.5938	0.135426			39.0977	0.128511			57.9062	0.111439											-6.59958
																	19.1016	0.0535777			40.1016	0.0715631			32.0977	0.105263			44.6992	0.136323			39.1016	0.129362			58.4062	0.112177											-6.60078
																	19.1094	0.0539302			40.2969	0.0720339			32.1953	0.105956			45	0.13722			39.1953	0.130213			58.8125	0.112915											-6.60648
																	19.2031	0.0542827			40.3125	0.0725047			32.1953	0.106648			46	0.138117			39.5	0.131064			59	0.113653											-6.63887
																	19.25	0.0546352			40.5	0.0729755			32.2969	0.107341			46	0.139013			39.7969	0.131915			59.1875	0.114391											-6.66239
																	19.3047	0.0549877			40.7031	0.0734463			32.3984	0.108033			46.4062	0.13991			39.9023	0.132766			59.2188	0.115129											-6.6658
																	19.375	0.0553401			40.8125	0.0739171			32.6016	0.108726			47.0938	0.140807			40	0.133617			59.4062	0.115867											-6.67562
																	19.3984	0.0556926			40.8906	0.0743879			33	0.109418			47.0938	0.141704			40.1016	0.134468			59.8906	0.116605											-6.68968
																	19.3984	0.0560451			40.8984	0.0748588			33.3984	0.110111			47.125	0.142601			40.1953	0.135319			59.9062	0.117343											-6.69143
																	19.4062	0.0563976			41	0.0753296			33.5	0.110803			47.4062	0.143498			40.1992	0.13617			60.1016	0.118081											-6.6989
																	19.5	0.0567501			41.4062	0.0758004			33.7031	0.111496			47.9062	0.144395			40.6016	0.137021			60.1875	0.118819											-6.7006
																	19.5	0.0571026			41.6016	0.0762712			33.7969	0.112188			48.0938	0.145291			40.7188	0.137872			60.2031	0.119557											-6.70139
																	19.5	0.0574551			41.8984	0.076742			33.8984	0.112881			48.2031	0.146188			40.7969	0.138723			60.2988	0.120295											-6.7088
																	19.5938	0.0578075			42.0938	0.0772128			33.8984	0.113573			49.1875	0.147085			40.7969	0.139574			60.4062	0.121033											-6.71296
																	19.6016	0.05816			42.2031	0.0776836			34.1953	0.114266			49.2812	0.147982			40.8008	0.140426			60.6016	0.121771											-6.73321
																	19.6875	0.0585125			42.6953	0.0781544			34.5977	0.114958			49.3125	0.148879			40.8008	0.141277			61.5938	0.122509											-6.75117
																	19.6953	0.058865			43.3047	0.0786252			34.7031	0.115651			49.5	0.149776			40.8984	0.142128			62	0.123247											-6.75709
																	19.6953	0.0592175			43.375	0.079096			34.9062	0.116343			50.2969	0.150673			40.9023	0.142979			62.5938	0.123985											-6.7676
																	19.6992	0.05957			43.6992	0.0795669			35	0.117036			50.4062	0.15157			41.1953	0.14383			62.8125	0.124723											-6.76966
																	19.7031	0.0599225			44.1016	0.0800377			35.0938	0.117729			50.5	0.152466			41.1992	0.144681			62.8906	0.125461											-6.77866
																	19.7031	0.0602749			44.3047	0.0805085			35.1016	0.118421			51.9062	0.153363			41.2031	0.145532			63	0.126199											-6.78229
																	19.7812	0.0606274			44.5	0.0809793			35.1953	0.119114			52.2031	0.15426			41.3008	0.146383			63	0.126937											-6.78612
																	19.7969	0.0609799			44.5938	0.0814501			35.3047	0.119806			52.2812	0.155157			41.3984	0.147234			63.2969	0.127675											-6.8001
																	19.8984	0.0613324			44.7031	0.0819209			35.3906	0.120499			52.5	0.156054			41.5	0.148085			64	0.128413											-6.80307
																	20	0.0616849			45.1875	0.0823917			35.5	0.121191			52.5938	0.156951			41.8008	0.148936			64.2188	0.129151											-6.82142
																	20	0.0620374			45.4062	0.0828625			35.8984	0.121884			53.0938	0.157848			42	0.149787			64.7969	0.129889											-6.8288
																	20.0938	0.0623898			45.5	0.0833333			35.9062	0.122576			53.0938	0.158744			42.1016	0.150638			64.8125	0.130627											-6.83837
																	20.0938	0.0627423			45.5938	0.0838041			36.1953	0.123269			53.2812	0.159641			42.1992	0.151489			64.8125	0.131365											-6.87563
																	20.0996	0.0630948			45.6875	0.084275			36.2031	0.123961			53.3125	0.160538			42.3008	0.15234			65.5937	0.132103											-6.88537
																	20.2031	0.0634473			45.7031	0.0847458			36.3047	0.124654			53.5	0.161435			43	0.153191			65.625	0.132841											-6.89095
																	20.2188	0.0637998			46.2031	0.0852166			36.3984	0.125346			53.7188	0.162332			43	0.154043			65.7969	0.133579											-6.90336
																	20.3125	0.0641523			46.375	0.0856874			36.4062	0.126039			54.2031	0.163229			43.1016	0.154894			65.8125	0.134317											-6.93039
																	20.375	0.0645048			46.4062	0.0861582			37	0.126731			55.0938	0.164126			43.1016	0.155745			66	0.135055											-6.9426
																	20.4062	0.0648572			46.5938	0.086629			37.0938	0.127424			55.1875	0.165022			43.1992	0.156596			66.3008	0.135793											-6.94891
																	20.5	0.0652097			46.8906	0.0870998			37.1016	0.128116			55.3125	0.165919			43.2031	0.157447			66.5938	0.136531											-6.97883
																	20.5	0.0655622			47.0625	0.0875706			37.1875	0.128809			55.4062	0.166816			43.3008	0.158298			66.6992	0.137269											-6.99897
																	20.5	0.0659147			47.1953	0.0880414			37.5	0.129501			55.5938	0.167713			43.3984	0.159149			67.1875	0.138007											-7.01502
																	20.5938	0.0662672			47.5	0.0885122			37.5	0.130194			56.3125	0.16861			43.5	0.16			67.1875	0.138745											-7.03132
																	20.7969	0.0666197			47.8984	0.0889831			37.6016	0.130886			56.7812	0.169507			43.6094	0.160851			67.375	0.139483											-7.03295
																	20.8008	0.0669722			47.8984	0.0894539			38	0.131579			56.9062	0.170404			43.8984	0.161702			67.4062	0.140221											-7.0411
																	21.1016	0.0673246			48.2031	0.0899247			38	0.132271			57.2188	0.1713			43.8984	0.162553			68.7812	0.140959											-7.05248
																	21.1953	0.0676771			48.2812	0.0903955			38.1016	0.132964			57.3906	0.172197			44	0.163404			69	0.141697											-7.06255
																	21.2031	0.0680296			48.2969	0.0908663			38.1016	0.133657			57.5	0.173094			44.1016	0.164255			69.1875	0.142435											-7.06292
																	21.3125	0.0683821			48.2969	0.0913371			38.1094	0.134349			57.5	0.173991			44.375	0.165106			69.2969	0.143173											-7.06434
																	21.3984	0.0687346			48.8906	0.0918079			38.1953	0.135042			57.625	0.174888			44.3984	0.165957			69.6016	0.143911											-7.07969
																	21.4062	0.0690871			49.3008	0.0922787			38.3008	0.135734			57.8906	0.175785			44.4023	0.166809			70.2188	0.144649											-7.08262
																	21.5938	0.0694395			49.7031	0.0927495			38.6016	0.136427			57.8984	0.176682			44.5	0.16766			70.5	0.145387											-7.09232
																	21.6016	0.069792			49.8984	0.0932203			39.0938	0.137119			58.2031	0.177578			44.6016	0.168511			70.5977	0.146125											-7.09932
																	21.7031	0.0701445			50.2812	0.0936911			39.1953	0.137812			59.6875	0.178475			44.6016	0.169362			70.8125	0.146863											-7.10375
																	21.7031	0.070497			50.3125	0.094162			39.2031	0.138504			60.0938	0.179372			44.6016	0.170213			71.1875	0.147601											-7.1164
																	21.7969	0.0708495			50.5	0.0946328			39.2969	0.139197			60.0938	0.180269			45.2031	0.171064			71.8125	0.148339											-7.11721
																	21.8008	0.071202			50.8984	0.0951036			39.2969	0.139889			61.8125	0.181166			45.5	0.171915			72	0.149077											-7.11771
																	21.8984	0.0715545			50.9062	0.0955744			39.3047	0.140582			62	0.182063			45.6992	0.172766			73.2031	0.149815											-7.12571
																	21.9062	0.0719069			51.0938	0.0960452			39.3906	0.141274			62.2031	0.18296			46.1016	0.173617			73.6992	0.150554											-7.1555
																	22	0.0722594			51.2969	0.096516			39.4062	0.141967			62.3125	0.183857			46.1992	0.174468			74.6992	0.151292											-7.16033
																	22.0938	0.0726119			51.2969	0.0969868			39.8125	0.142659			62.6875	0.184753			46.2969	0.175319			75	0.15203											-7.16821
																	22.0996	0.0729644			51.6016	0.0974576			39.8906	0.143352			62.6875	0.18565			46.2988	0.17617			75.2188	0.152768											-7.17269
																	22.1953	0.0733169			51.7031	0.0979284			40	0.144044			63.5	0.186547			46.3984	0.177021			75.2969	0.153506											-7.17574
																	22.2969	0.0736694			52.8984	0.0983992			40.3906	0.144737			64	0.187444			46.5	0.177872			75.4062	0.154244											-7.19181
																	22.3984	0.0740219			53.1016	0.0988701			40.5938	0.145429			65.5	0.188341			46.8008	0.178723			75.7812	0.154982											-7.23426
																	22.3984	0.0743743			53.6016	0.0993409			40.6016	0.146122			65.6016	0.189238			46.8047	0.179574			76.4023	0.15572											-7.25659
																	22.5	0.0747268			53.6875	0.0998117			40.6016	0.146814			65.7969	0.190135			47	0.180426			76.4062	0.156458											-7.25832
																	22.5938	0.0750793			53.7031	0.100282			40.7031	0.147507			65.9062	0.191031			47.5	0.181277			76.5938	0.157196											-7.27248
																	22.5977	0.0754318			53.8984	0.100753			41.1875	0.148199			66.1992	0.191928			47.6992	0.182128			76.8008	0.157934											-7.2902
																	22.6016	0.0757843			54	0.101224			41.5938	0.148892			66.4062	0.192825			47.8008	0.182979			77	0.158672											-7.29148
																	22.6016	0.0761368			54.1875	0.101695			41.5938	0.149584			66.6875	0.193722			47.8008	0.18383			77	0.15941											-7.29795
																	22.6953	0.0764892			54.6094	0.102166			41.9062	0.150277			66.7812	0.194619			47.8984	0.184681			77.375	0.160148											-7.29849
																	22.7012	0.0768417			55	0.102637			42	0.15097			66.8984	0.195516			48	0.185532			77.7812	0.160886											-7.30449
																	22.7969	0.0771942			55.2031	0.103107			42.0938	0.151662			67.0938	0.196413			48.2969	0.186383			77.7812	0.161624											-7.30759
																	22.7969	0.0775467			55.3906	0.103578			42.2969	0.152355			67.0938	0.197309			48.3008	0.187234			78	0.162362											-7.30938
																	22.8047	0.0778992			55.5	0.104049			42.3008	0.153047			67.2812	0.198206			48.5	0.188085			78.7812	0.1631											-7.31212
																	22.8047	0.0782517			55.5938	0.10452			42.4062	0.15374			67.8125	0.199103			48.7969	0.188936			79.2188	0.163838											-7.31365
																	22.8047	0.0786042			56.3125	0.104991			42.7969	0.154432			68.0938	0.2			48.8008	0.189787			79.2969	0.164576											-7.31483
																	22.8984	0.0789566			56.8047	0.105461			42.9062	0.155125			68.0938	0.200897			49.6992	0.190638			79.4023	0.165314											-7.31927
																	22.9004	0.0793091			57.1016	0.105932			43.2969	0.155817			68.2188	0.201794			49.8008	0.191489			80	0.166052											-7.33154
																	22.9062	0.0796616			57.1875	0.106403			43.3125	0.15651			68.375	0.202691			50.5	0.19234			80.2969	0.16679											-7.3415
																	23	0.0800141			57.5	0.106874			43.7969	0.157202			68.3984	0.203587			50.6016	0.193191			81.6094	0.167528											-7.34722
																	23	0.0803666			57.6875	0.107345			43.8047	0.157895			68.7969	0.204484			51	0.194043			82	0.168266											-7.38922
																	23	0.0807191			57.7969	0.107815			43.8984	0.158587			68.9062	0.205381			51	0.194894			83.7812	0.169004											-7.39631
																	23.1016	0.0810716			57.7969	0.108286			44	0.15928			69	0.206278			51.1992	0.195745			84.1875	0.169742											-7.41233
																	23.1016	0.081424			58.2031	0.108757			44	0.159972			69	0.207175			51.2988	0.196596			84.8125	0.17048											-7.42877
																	23.1016	0.0817765			58.2969	0.109228			44	0.160665			70.2188	0.208072			51.375	0.197447			85	0.171218											-7.42937
																	23.1016	0.082129			58.3047	0.109699			44.2031	0.161357			70.5938	0.208969			51.3984	0.198298			85.4062	0.171956											-7.43029
																	23.2188	0.0824815			58.4062	0.110169			44.2031	0.16205			70.7188	0.209865			51.5	0.199149			85.6992	0.172694											-7.43065
																	23.3125	0.082834			58.6016	0.11064			44.3125	0.162742			70.7969	0.210762			51.5	0.2			86	0.173432											-7.45551
																	23.3125	0.0831865			59.0938	0.111111			44.5	0.163435			71.125	0.211659			51.625	0.200851			86.7812	0.17417											-7.4668
																	23.375	0.0835389			59.3984	0.111582			44.5	0.164127			71.2812	0.212556			52.3984	0.201702			86.8125	0.174908											-7.46959
																	23.3984	0.0838914			59.3984	0.112053			44.5938	0.16482			71.9062	0.213453			52.5	0.202553			87.8984	0.175646											-7.47425
																	23.3994	0.0842439			59.5	0.112524			44.6016	0.165512			72.125	0.21435			52.7012	0.203404			88.5938	0.176384											-7.48216
																	23.5	0.0845964			59.7031	0.112994			44.6016	0.166205			72.2188	0.215247			52.7969	0.204255			89.5	0.177122											-7.48287
																	23.5	0.0849489			59.7969	0.113465			44.7031	0.166898			72.5938	0.216143			53.1016	0.205106			89.5938	0.17786											-7.49465
																	23.5938	0.0853014			59.8984	0.113936			44.7969	0.16759			72.5938	0.21704			53.2969	0.205957			89.5938	0.178598											-7.50852
																	23.5996	0.0856539			60.0938	0.114407			44.7969	0.168283			72.625	0.217937			53.3008	0.206809			89.5977	0.179336											-7.54185
																	23.6016	0.0860063			60.2031	0.114878			44.7969	0.168975			73.1875	0.218834			53.4062	0.20766			89.6992	0.180074											-7.54999
																	23.6016	0.0863588			61	0.115348			44.8008	0.169668			73.5	0.219731			53.6016	0.208511			89.7969	0.180812											-7.55478
																	23.6016	0.0867113			61.0938	0.115819			44.8984	0.17036			73.625	0.220628			53.7988	0.209362			90	0.18155											-7.58525
																	23.625	0.0870638			61.0938	0.11629			45	0.171053			74.0938	0.221525			55	0.210213			90	0.182288											-7.59597
																	23.7031	0.0874163			61.1016	0.116761			45	0.171745			74.875	0.222422			55.7031	0.211064			90.1094	0.183026											-7.59601
																	23.7969	0.0877688			61.1016	0.117232			45.3047	0.172438			75.4062	0.223318			56	0.211915			90.5	0.183764											-7.59765
																	23.7969	0.0881213			61.1953	0.117702			45.3999	0.17313			75.8125	0.224215			56.3984	0.212766			90.7969	0.184502											-7.59773
																	24	0.0884737			61.2031	0.118173			45.5938	0.173823			76	0.225112			56.6016	0.213617			91	0.18524											-7.61268
																	24	0.0888262			61.2188	0.118644			45.7031	0.174515			76.375	0.226009			57.1016	0.214468			91.2188	0.185978											-7.62092
																	24	0.0891787			61.7031	0.119115			45.8906	0.175208			76.5938	0.226906			58	0.215319			91.5	0.186716											-7.63673
																	24.0996	0.0895312			61.8984	0.119586			45.8984	0.1759			76.8125	0.227803			58.2031	0.21617			91.9023	0.187454											-7.6433
																	24.3047	0.0898837			61.9062	0.120056			46	0.176593			77.0938	0.2287			58.4062	0.217021			92.8125	0.188192											-7.6471
																	24.3047	0.0902362			62.3906	0.120527			46.0938	0.177285			77.3125	0.229596			58.6992	0.217872			92.8125	0.18893											-7.65084
																	24.6016	0.0905886			62.5	0.120998			46.1875	0.177978			77.5938	0.230493			58.7031	0.218723			93.4062	0.189668											-7.66016
																	24.625	0.0909411			62.5	0.121469			46.2031	0.17867			77.625	0.23139			59.2988	0.219574			93.8125	0.190406											-7.6625
																	24.7969	0.0912936			62.5938	0.12194			46.8984	0.179363			77.8125	0.232287			59.3984	0.220426			94.3984	0.191144											-7.67593
																	24.875	0.0916461			62.7031	0.122411			47.0938	0.180055			78.875	0.233184			59.6016	0.221277			94.5938	0.191882											-7.67955
																	24.8984	0.0919986			63.2969	0.122881			47.0938	0.180748			79.3125	0.234081			59.8008	0.222128			94.7813	0.19262											-7.6817
																	24.8984	0.0923511			63.2988	0.123352			47.0938	0.18144			79.375	0.234978			59.9062	0.222979			95.1992	0.193358											-7.68207
																	25	0.0927036			63.5	0.123823			47.1016	0.182133			79.4062	0.235874			60	0.22383			95.5938	0.194096											-7.6936
																	25.0977	0.093056			63.7969	0.124294			47.2031	0.182825			80	0.236771			60.2969	0.224681			95.6953	0.194834											-7.6978
																	25.1016	0.0934085			63.875	0.124765			47.7969	0.183518			80.3984	0.237668			60.6992	0.225532			96	0.195572											-7.71716
																	25.1875	0.093761			64.0938	0.125235			47.8984	0.184211			81	0.238565			61.1016	0.226383			96.1875	0.19631											-7.72484
																	25.1992	0.0941135			64.2969	0.125706			48.0938	0.184903			81.0938	0.239462			61.2031	0.227234			96.7812	0.197048											-7.72847
																	25.2012	0.094466			64.3906	0.126177			48.1875	0.185596			81.4062	0.240359			61.6016	0.228085			96.8008	0.197786											-7.7324
																	25.2969	0.0948185			64.5	0.126648			48.2031	0.186288			81.6875	0.241256			62	0.228936			97.0938	0.198524											-7.73318
																	25.3047	0.095171			64.5	0.127119			48.4062	0.186981			81.6875	0.242152			62.0938	0.229787			97.2188	0.199262											-7.73597
																	25.375	0.0955234			64.6094	0.127589			48.5	0.187673			81.7031	0.243049			62.0977	0.230638			97.4062	0.2											-7.74293
																	25.3984	0.0958759			64.625	0.12806			48.5	0.188366			82.7969	0.243946			62.2031	0.231489			97.7812	0.200738											-7.74712
																	25.3984	0.0962284			64.7031	0.128531			48.5	0.189058			82.8125	0.244843			62.8984	0.23234			99.5977	0.201476											-7.75266
																	25.3984	0.0965809			65.0938	0.129002			48.6016	0.189751			83.4062	0.24574			63.8008	0.233191			99.7031	0.202214											-7.76394
																	25.5	0.0969334			65.9375	0.129473			48.7969	0.190443			83.5	0.246637			64	0.234043			100	0.202952											-7.78051
																	25.6016	0.0972859			66.1953	0.129944			48.8047	0.191136			83.5938	0.247534			64	0.234894			100.75	0.20369											-7.78413
																	25.7031	0.0976384			66.7031	0.130414			48.8984	0.191828			83.9062	0.24843			64.4062	0.235745			100.797	0.204428											-7.78527
																	25.7031	0.0979908			66.7969	0.130885			49.2969	0.192521			84	0.249327			64.7969	0.236596			100.799	0.205166											-7.7876
																	25.7969	0.0983433			67	0.131356			49.5	0.193213			84.0938	0.250224			64.8984	0.237447			101.812	0.205904											-7.82696
																	25.9062	0.0986958			67.1016	0.131827			49.5	0.193906			84.5	0.251121			64.9023	0.238298			102.102	0.206642											-7.82972
																	25.9062	0.0990483			67.1016	0.132298			49.6992	0.194598			84.9062	0.252018			65.2969	0.239149			102.609	0.20738											-7.84362
																	26	0.0994008			67.3984	0.132768			50.5938	0.195291			85.0938	0.252915			65.6016	0.24			102.812	0.208118											-7.85177
																	26	0.0997533			67.7969	0.133239			50.6094	0.195983			85.3125	0.253812			65.6992	0.240851			102.812	0.208856											-7.85283
																	26.1875	0.100106			67.8984	0.13371			50.625	0.196676			85.5	0.254709			65.7969	0.241702			103	0.209594											-7.89032
																	26.2002	0.100458			67.8984	0.134181			50.7031	0.197368			86	0.255605			66.3984	0.242553			104.219	0.210332											-7.89413
																	26.2969	0.100811			68.125	0.134652			50.7969	0.198061			86.2031	0.256502			66.5	0.243404			104.219	0.21107											-7.90442
																	26.2969	0.101163			68.8125	0.135122			50.7969	0.198753			86.3125	0.257399			67.1016	0.244255			104.375	0.211808											-7.91662
																	26.2969	0.101516			68.9023	0.135593			50.7969	0.199446			86.3125	0.258296			67.3008	0.245106			104.594	0.212546											-7.94063
																	26.3047	0.101868			68.9062	0.136064			51	0.200139			86.9062	0.259193			67.3984	0.245957			104.602	0.213284											-7.9411
																	26.375	0.102221			69.3906	0.136535			51.2031	0.200831			87.1875	0.26009			67.6016	0.246809			105.594	0.214022											-7.94188
																	26.3984	0.102573			69.5938	0.137006			51.3047	0.201524			87.625	0.260987			67.6992	0.24766			106.188	0.21476											-7.9466
																	26.4062	0.102926			70.8984	0.137476			51.3984	0.202216			88.5	0.261883			68.5	0.248511			106.219	0.215498											-7.94778
																	26.5938	0.103278			71	0.137947			51.3984	0.202909			88.5	0.26278			68.5	0.249362			106.297	0.216236											-7.95638
																	26.5938	0.103631			71.3125	0.138418			51.3984	0.203601			88.9062	0.263677			68.8984	0.250213			106.301	0.216974											-7.96844
																	26.6016	0.103983			71.375	0.138889			51.6094	0.204294			89.3125	0.264574			69	0.251064			106.375	0.217712											-7.97723
																	26.6992	0.104336			72.1016	0.13936			51.6992	0.204986			89.7969	0.265471			70.5	0.251915			106.594	0.21845											-7.97863
																	26.7998	0.104688			72.1094	0.139831			51.8125	0.205679			90	0.266368			71.3008	0.252766			106.594	0.219188											-7.98463
																	26.8008	0.105041			72.5	0.140301			51.9062	0.206371			90	0.267265			71.7031	0.253617			107.203	0.219926											-7.9868
																	26.8984	0.105393			72.5	0.140772			52	0.207064			90.0938	0.268161			72.1992	0.254468			107.297	0.220664											-7.98881
																	26.9062	0.105746			72.7031	0.141243			52	0.207756			90.2188	0.269058			72.3984	0.255319			107.297	0.221402											-7.99648
																	27	0.106098			73.2031	0.141714			52.2969	0.208449			90.5938	0.269955			73.1016	0.25617			107.375	0.22214											-7.9976
																	27	0.10645			73.3125	0.142185			52.5	0.209141			90.6875	0.270852			73.1016	0.257021			107.594	0.222878											-8.00487
																	27	0.106803			73.5	0.142655			52.7031	0.209834			91.2031	0.271749			73.5	0.257872			107.703	0.223616											-8.0153
																	27.0938	0.107155			73.6016	0.143126			52.7031	0.210526			91.2188	0.272646			74.6992	0.258723			107.707	0.224354											-8.01571
																	27.1016	0.107508			73.7031	0.143597			52.7969	0.211219			91.6875	0.273543			74.6992	0.259574			108.301	0.225092											-8.01984
																	27.2031	0.10786			73.7031	0.144068			52.7969	0.211911			91.9062	0.274439			75	0.260426			108.301	0.22583											-8.02254
																	27.2969	0.108213			74	0.144539			52.8047	0.212604			92	0.275336			75.3008	0.261277			108.406	0.226568											-8.02527
																	27.2969	0.108565			74	0.145009			52.8047	0.213296			93.2812	0.276233			75.3984	0.262128			109.594	0.227306											-8.02655
																	27.3047	0.108918			74.1875	0.14548			53	0.213989			93.5	0.27713			75.5	0.262979			109.699	0.228044											-8.03406
																	27.375	0.10927			74.2969	0.145951			53.0938	0.214681			93.5938	0.278027			76.1016	0.26383			110	0.228782											-8.03848
																	27.3984	0.109623			74.7031	0.146422			53.2969	0.215374			93.8125	0.278924			76.5	0.264681			111.297	0.22952											-8.074
																	27.5	0.109975			75.7031	0.146893			53.2969	0.216066			94	0.279821			76.5	0.265532			111.297	0.230258											-8.09667
																	27.5996	0.110328			75.8984	0.147363			53.2969	0.216759			94.5938	0.280717			77	0.266383			111.812	0.230996											-8.098
																	27.6875	0.11068			75.8984	0.147834			53.7188	0.217452			94.7188	0.281614			77.7188	0.267234			112	0.231734											-8.10182
																	27.6992	0.111033			76	0.148305			53.7969	0.218144			95.1953	0.282511			77.7969	0.268085			112	0.232472											-8.10496
																	27.8008	0.111385			76.2969	0.148776			53.9062	0.218837			95.2188	0.283408			79	0.268936			112.297	0.23321											-8.11387
																	27.8984	0.111738			76.4062	0.149247			54	0.219529			95.5	0.284305			79.0977	0.269787			112.812	0.233948											-8.11768
																	27.9062	0.11209			76.8125	0.149718			54.0938	0.220222			96.125	0.285202			79.4062	0.270638			112.906	0.234686											-8.11805
																	28	0.112443			76.8906	0.150188			54.1875	0.220914			96.5938	0.286099			81.2812	0.271489			113.625	0.235424											-8.11865
																	28	0.112795			77.0938	0.150659			54.2969	0.221607			97	0.286996			81.4062	0.27234			114	0.236162											-8.15055
																	28.0938	0.113148			77.3125	0.15113			54.3984	0.222299			97.5938	0.287892			81.5	0.273191			114.594	0.2369											-8.15427
																	28.1016	0.1135			77.6953	0.151601			54.5	0.222992			97.7812	0.288789			81.5	0.274043			114.699	0.237638											-8.15524
																	28.1016	0.113853			77.9375	0.152072			54.6016	0.223684			98	0.289686			81.9023	0.274894			116	0.238376											-8.15877
																	28.1953	0.114205			78.3125	0.152542			55.2969	0.224377			98.4062	0.290583			82.1992	0.275745			116.102	0.239114											-8.15961
																	28.1992	0.114558			78.3984	0.153013			55.5977	0.225069			98.7188	0.29148			82.8008	0.276596			116.5	0.239852											-8.16112
																	28.2031	0.11491			78.6016	0.153484			55.8984	0.225762			98.7969	0.292377			84.6016	0.277447			117.594	0.24059											-8.16598
																	28.2969	0.115263			78.8047	0.153955			55.9062	0.226454			99.0938	0.293274			84.6016	0.278298			117.812	0.241328											-8.16629
																	28.3047	0.115615			78.8906	0.154426			56.1016	0.227147			99.3125	0.29417			85.2031	0.279149			118.406	0.242066											-8.16665
																	28.3125	0.115968			78.8984	0.154896			56.1875	0.227839			100.719	0.295067			85.2969	0.28			118.406	0.242804											-8.19058
																	28.375	0.11632			79.0938	0.155367			56.2031	0.228532			100.812	0.295964			85.3125	0.280851			120.594	0.243542											-8.1914
																	28.3984	0.116673			79.5625	0.155838			56.2031	0.229224			101.094	0.296861			85.5	0.281702			120.594	0.24428											-8.1979
																	28.4062	0.117025			79.5938	0.156309			56.6016	0.229917			101.406	0.297758			85.9023	0.282553			120.812	0.245018											-8.21765
																	28.5938	0.117378			80.2969	0.15678			56.6094	0.230609			101.594	0.298655			86.1016	0.283404			121.406	0.245756											-8.22098
																	28.6016	0.11773			80.4062	0.15725			56.8984	0.231302			102.688	0.299552			86.1992	0.284255			121.812	0.246494											-8.22333
																	28.7969	0.118082			80.5625	0.157721			57	0.231994			102.906	0.300448			86.6016	0.285106			122.203	0.247232											-8.23091
																	28.7969	0.118435			80.6992	0.158192			57.2031	0.232687			103.188	0.301345			87.2969	0.285957			122.594	0.24797											-8.2386
																	28.7969	0.118787			80.7969	0.158663			57.2969	0.23338			103.688	0.302242			87.6016	0.286809			124	0.248708											-8.27673
																	28.8125	0.11914			80.7969	0.159134			57.3125	0.234072			104	0.303139			87.6016	0.28766			124	0.249446											-8.28106
																	29	0.119492			80.9062	0.159605			57.5	0.234765			105	0.304036			87.6992	0.288511			124.219	0.250185											-8.28601
																	29.1875	0.119845			81	0.160075			57.5	0.235457			105.094	0.304933			87.8984	0.289362			124.297	0.250923											-8.30007
																	29.1992	0.120197			81.3125	0.160546			57.6001	0.23615			105.281	0.30583			88.1992	0.290213			124.695	0.251661											-8.3067
																	29.2031	0.12055			81.5	0.161017			57.7002	0.236842			105.5	0.306726			88.7969	0.291064			124.781	0.252399											-8.34129
																	29.2031	0.120902			82.2969	0.161488			58	0.237535			105.5	0.307623			89	0.291915			125.801	0.253137											-8.34417
																	29.2969	0.121255			82.2969	0.161959			58	0.238227			105.719	0.30852			89.1016	0.292766			126.094	0.253875											-8.3544
																	29.5938	0.121607			82.3984	0.162429			58.0938	0.23892			107	0.309417			89.1016	0.293617			126.406	0.254613											-8.40417
																	29.6016	0.12196			82.3984	0.1629			58.1875	0.239612			107.906	0.310314			89.3008	0.294468			126.5	0.255351											-8.40594
																	29.6953	0.122312			82.7031	0.163371			58.3984	0.240305			109.312	0.311211			89.6016	0.295319			127.199	0.256089											-8.40731
																	29.8047	0.122665			82.9062	0.163842			58.7969	0.240997			110.188	0.312108			90.0977	0.29617			127.5	0.256827											-8.41446
																	29.8984	0.123017			83.125	0.164313			58.8984	0.24169			110.219	0.313004			90.1016	0.297021			127.594	0.257565											-8.41993
																	29.9062	0.12337			83.3047	0.164783			59	0.242382			110.5	0.313901			90.3008	0.297872			127.625	0.258303											-8.42876
																	30	0.123722			83.5	0.165254			59.4062	0.243075			110.609	0.314798			91	0.298723			127.812	0.259041											-8.44411
																	30.0938	0.124075			83.5	0.165725			59.8125	0.243767			111.312	0.315695			91.3008	0.299574			128.406	0.259779											-8.44848
																	30.0938	0.124427			83.6016	0.166196			59.8984	0.24446			111.406	0.316592			91.4023	0.300426			129	0.260517											-8.45016
																	30.0977	0.12478			83.7031	0.166667			60.3047	0.245152			111.703	0.317489			91.8984	0.301277			129.203	0.261255											-8.46432
																	30.0996	0.125132			83.7969	0.167137			60.5938	0.245845			111.906	0.318386			92.1953	0.302128			129.219	0.261993											-8.4675
																	30.1016	0.125485			84	0.167608			60.6016	0.246537			112.902	0.319283			92.2031	0.302979			129.406	0.262731											-8.47161
																	30.125	0.125837			84.3984	0.168079			60.7031	0.24723			112.906	0.320179			92.3125	0.30383			129.797	0.263469											-8.48939
																	30.1953	0.12619			84.8984	0.16855			60.7969	0.247922			113.5	0.321076			93	0.304681			130	0.264207											-8.49444
																	30.1992	0.126542			85	0.169021			61.1016	0.248615			114.625	0.321973			93.2969	0.305532			130	0.264945											-8.49486
																	30.2031	0.126895			85.2031	0.169492			61.2969	0.249307			114.906	0.32287			93.4004	0.306383			130.199	0.265683											-8.51674
																	30.2969	0.127247			85.8984	0.169962			61.8125	0.25			115.406	0.323767			93.5	0.307234			130.797	0.266421											-8.53504
																	30.375	0.1276			86.1016	0.170433			62.2031	0.250693			115.406	0.324664			93.9023	0.308085			130.799	0.267159											-8.53824
																	30.4023	0.127952			86.1875	0.170904			62.2969	0.251385			115.5	0.325561			94.6992	0.308936			131	0.267897											-8.54251
																	30.5	0.128305			86.3984	0.171375			62.5	0.252078			115.594	0.326457			94.8047	0.309787			131	0.268635											-8.55073
																	30.5	0.128657			86.5625	0.171846			62.6953	0.25277			117.219	0.327354			94.8984	0.310638			132.375	0.269373											-8.55903
																	30.5938	0.12901			86.6875	0.172316			62.8984	0.253463			117.5	0.328251			95.2969	0.311489			132.594	0.270111											-8.55996
																	30.5938	0.129362			86.875	0.172787			62.8984	0.254155			117.594	0.329148			95.6992	0.31234			133.188	0.270849											-8.56548
																	30.5938	0.129714			86.9375	0.173258			63.7031	0.254848			119.188	0.330045			96	0.313191			133.297	0.271587											-8.56766
																	30.5938	0.130067			87.5	0.173729			63.8906	0.25554			119.406	0.330942			96.3047	0.314043			133.406	0.272325											-8.57558
																	30.6006	0.130419			87.5938	0.1742			63.8906	0.256233			119.5	0.331839			97.1992	0.314894			134.406	0.273063											-8.58236
																	30.6953	0.130772			87.5996	0.17467			64	0.256925			119.5	0.332735			97.4062	0.315745			134.891	0.273801											-8.58559
																	30.7031	0.131124			87.6016	0.175141			64.2031	0.257618			119.875	0.333632			97.5	0.316596			135	0.274539											-8.58728
																	30.7031	0.131477			87.9375	0.175612			64.2969	0.25831			120.203	0.334529			97.6016	0.317447			135.891	0.275277											-8.62167
																	30.7969	0.131829			88.1016	0.176083			64.4062	0.259003			120.5	0.335426			98.5	0.318298			136.594	0.276015											-8.62254
																	30.7969	0.132182			88.1016	0.176554			64.6016	0.259695			121.219	0.336323			99.1016	0.319149			136.812	0.276753											-8.62406
																	30.8047	0.132534			88.3906	0.177024			65.2031	0.260388			121.5	0.33722			99.2031	0.32			137.297	0.277491											-8.62975
																	30.8047	0.132887			88.5938	0.177495			65.2969	0.26108			122	0.338117			99.3125	0.320851			137.375	0.278229											-8.63946
																	30.8984	0.133239			88.8047	0.177966			65.5	0.261773			122.5	0.339013			99.9062	0.321702			137.406	0.278967											-8.63977
																	30.8984	0.133592			88.9062	0.178437			65.5	0.262465			122.812	0.33991			100.102	0.322553			137.406	0.279705											-8.64701
																	31.1953	0.133944			89.1875	0.178908			65.8047	0.263158			123.094	0.340807			100.5	0.323404			137.594	0.280443											-8.65102
																	31.1953	0.134297			89.2031	0.179379			66.1953	0.26385			124.406	0.341704			100.703	0.324255			137.781	0.281181											-8.67346
																	31.2031	0.134649			89.7031	0.179849			66.2969	0.264543			124.5	0.342601			100.797	0.325106			138.406	0.281919											-8.67863
																	31.3125	0.135002			89.9062	0.18032			66.4062	0.265235			126.094	0.343498			101.902	0.325957			138.781	0.282657											-8.71691
																	31.3906	0.135354			90.1094	0.180791			66.5	0.265928			126.094	0.344395			102.797	0.326809			139.203	0.283395											-8.71906
																	31.5	0.135707			90.2969	0.181262			66.5	0.26662			127.188	0.345291			103.5	0.32766			139.594	0.284133											-8.71981
																	31.5	0.136059			90.6875	0.181733			66.6953	0.267313			127.688	0.346188			104.102	0.328511			140	0.284871											-8.72014
																	31.6016	0.136412			90.8047	0.182203			67.2031	0.268006			128.703	0.347085			104.203	0.329362			141.219	0.285609											-8.72245
																	31.6953	0.136764			90.8047	0.182674			67.3906	0.268698			129.203	0.347982			105.301	0.330213			141.797	0.286347											-8.73043
																	31.6992	0.137117			90.8984	0.183145			67.5	0.269391			130.875	0.348879			106.301	0.331064			142	0.287085											-8.73215
																	31.7031	0.137469			90.9062	0.183616			67.6016	0.270083			130.906	0.349776			106.301	0.331915			142.406	0.287823											-8.73913
																	32.0938	0.137822			92	0.184087			67.8047	0.270776			131.594	0.350673			106.398	0.332766			142.781	0.288561											-8.74274
																	32.0938	0.138174			92.1953	0.184557			67.8999	0.271468			131.906	0.35157			106.402	0.333617			143.297	0.289299											-8.74859
																	32.0938	0.138527			92.375	0.185028			68	0.272161			132.406	0.352466			108.094	0.334468			143.406	0.290037											-8.75118
																	32.1016	0.138879			92.4062	0.185499			68	0.272853			132.5	0.353363			108.602	0.335319			144.812	0.290775											-8.75487
																	32.3984	0.139232			92.8125	0.18597			68.4062	0.273546			132.594	0.35426			108.797	0.33617			145.098	0.291513											-8.75853
																	32.4062	0.139584			93.0938	0.186441			68.5	0.274238			132.906	0.355157			110.098	0.337021			145.109	0.292251											-8.76391
																	32.5	0.139937			93.1016	0.186911			68.5938	0.274931			133.297	0.356054			110.5	0.337872			145.203	0.292989											-8.76665
																	32.5	0.140289			93.2031	0.187382			68.5938	0.275623			133.594	0.356951			111.102	0.338723			145.301	0.293727											-8.76806
																	32.6016	0.140642			93.5938	0.187853			68.7969	0.276316			133.781	0.357848			111.5	0.339574			145.301	0.294465											-8.78998
																	32.6016	0.140994			94.3047	0.188324			68.8047	0.277008			134.406	0.358744			111.801	0.340426			146.5	0.295203											-8.80357
																	32.6992	0.141346			94.7969	0.188795			69	0.277701			134.812	0.359641			112.406	0.341277			146.812	0.295941											-8.80652
																	32.7031	0.141699			95.3047	0.189266			69.1875	0.278393			134.906	0.360538			112.5	0.342128			147.219	0.296679											-8.81124
																	32.7969	0.142051			95.7031	0.189736			69.4004	0.279086			137.094	0.361435			112.699	0.342979			147.375	0.297417											-8.81186
																	32.7969	0.142404			95.7969	0.190207			69.7031	0.279778			137.094	0.362332			113.102	0.34383			147.625	0.298155											-8.8154
																	32.8125	0.142756			96	0.190678			70.1016	0.280471			137.391	0.363229			114.406	0.344681			147.812	0.298893											-8.82579
																	32.8984	0.143109			96	0.191149			70.1953	0.281163			137.398	0.364126			115.195	0.345532			147.896	0.299631											-8.82778
																	32.8984	0.143461			96.2031	0.19162			70.2031	0.281856			137.781	0.365022			116.703	0.346383			148	0.300369											-8.83866
																	32.9023	0.143814			96.3125	0.19209			70.2031	0.282548			138.094	0.365919			116.801	0.347234			148.219	0.301107											-8.83961
																	33	0.144166			97.2969	0.192561			70.2969	0.283241			138.5	0.366816			117.5	0.348085			149	0.301845											-8.84046
																	33	0.144519			97.8984	0.193032			70.7031	0.283934			138.625	0.367713			118.098	0.348936			149	0.302583											-8.84217
																	33	0.144871			98.4062	0.193503			70.7031	0.284626			138.898	0.36861			120.102	0.349787			149	0.303321											-8.84996
																	33.0938	0.145224			98.6094	0.193974			70.8984	0.285319			139.094	0.369507			121	0.350638			149.188	0.304059											-8.85771
																	33.1953	0.145576			98.7031	0.194444			71.0859	0.286011			139.188	0.370404			121	0.351489			149.781	0.304797											-8.86298
																	33.2031	0.145929			99	0.194915			71.0938	0.286704			139.594	0.3713			121.898	0.35234			149.812	0.305535											-8.86995
																	33.2031	0.146281			99	0.195386			71.0938	0.287396			139.812	0.372197			122.098	0.353191			151	0.306273											-8.87209
																	33.2998	0.146634			99.1016	0.195857			71.1094	0.288089			141.402	0.373094			122.102	0.354043			151	0.307011											-8.87539
																	33.3984	0.146986			99.3008	0.196328			71.2031	0.288781			141.906	0.373991			122.199	0.354894			151.602	0.307749											-8.89253
																	33.5	0.147339			99.4023	0.196798			71.6719	0.289474			142.297	0.374888			122.797	0.355745			152	0.308487											-8.89864
																	33.5	0.147691			99.4062	0.197269			72.1016	0.290166			142.812	0.375785			123	0.356596			152	0.309225											-8.8995
																	33.5938	0.148044			99.8008	0.19774			72.3906	0.290859			143	0.376682			123.312	0.357447			153.406	0.309963											-8.91074
																	33.6016	0.148396			100	0.198211			72.4062	0.291551			143.406	0.377578			123.398	0.358298			153.594	0.310701											-8.91317
																	33.6016	0.148749			100.188	0.198682			72.7969	0.292244			143.406	0.378475			123.406	0.359149			155	0.311439											-8.91371
																	33.6992	0.149101			100.312	0.199153			72.9062	0.292936			143.5	0.379372			123.688	0.36			155.598	0.312177											-8.92015
																	33.6992	0.149454			100.398	0.199623			73.1016	0.293629			144.195	0.380269			123.797	0.360851			156.781	0.312915											-8.9256
																	33.6992	0.149806			100.406	0.200094			73.1953	0.294321			145.781	0.381166			124.301	0.361702			157.594	0.313653											-8.93306
																	33.7012	0.150159			100.688	0.200565			73.2969	0.295014			146.219	0.382063			125.402	0.362553			157.625	0.314391											-8.94464
																	33.7031	0.150511			100.797	0.201036			73.4062	0.295706			148.094	0.38296			126.188	0.363404			157.781	0.315129											-8.95999
																	33.7969	0.150864			100.898	0.201507			73.8984	0.296399			148.406	0.383857			126.398	0.364255			158.219	0.315867											-8.96776
																	33.7969	0.151216			101.102	0.201977			74	0.297091			148.719	0.384753			126.398	0.365106			158.406	0.316605											-8.9697
																	33.8984	0.151569			101.305	0.202448			74	0.297784			149.688	0.38565			126.602	0.365957			158.5	0.317343											-8.97585
																	33.9062	0.151921			101.5	0.202919			74.5	0.298476			151.688	0.386547			127	0.366809			158.602	0.318081											-8.97836
																	33.9062	0.152274			102.312	0.20339			74.5	0.299169			152.281	0.387444			128.602	0.36766			159.102	0.318819											-8.97868
																	34	0.152626			103.398	0.203861			74.6094	0.299861			152.594	0.388341			128.805	0.368511			159.406	0.319557											-8.97877
																	34	0.152978			103.703	0.204331			74.8003	0.300554			153.875	0.389238			129.102	0.369362			160.5	0.320295											-8.98878
																	34.1992	0.153331			103.805	0.204802			74.8047	0.301247			154.812	0.390135			129.699	0.370213			161.188	0.321033											-8.99083
																	34.2188	0.153683			103.898	0.205273			75.3984	0.301939			155.812	0.391031			130.4	0.371064			161.199	0.321771											-9.00889
																	34.3125	0.154036			104	0.205744			75.5938	0.302632			155.906	0.391928			131.5	0.371915			164	0.322509											-9.01869
																	34.375	0.154388			104.406	0.206215			76.2969	0.303324			156.594	0.392825			132.797	0.372766			164.199	0.323247											-9.02045
																	34.3984	0.154741			104.5	0.206685			76.3047	0.304017			156.781	0.393722			133.5	0.373617			166	0.323985											-9.02247
																	34.5	0.155093			105.188	0.207156			76.8984	0.304709			157.219	0.394619			133.805	0.374468			166.199	0.324723											-9.02328
																	34.5	0.155446			105.297	0.207627			77.0859	0.305402			157.812	0.395516			134.906	0.375319			166.297	0.325461											-9.0278
																	34.6016	0.155798			105.5	0.208098			77.1953	0.306094			159	0.396413			135.299	0.37617			166.797	0.326199											-9.02875
																	34.7002	0.156151			105.805	0.208569			77.4062	0.306787			159.5	0.397309			135.398	0.377021			166.891	0.326937											-9.0362
																	34.7012	0.156503			106.188	0.20904			77.5938	0.307479			159.812	0.398206			135.594	0.377872			167.5	0.327675											-9.05077
																	34.75	0.156856			106.594	0.20951			77.7031	0.308172			159.906	0.399103			136.801	0.378723			167.594	0.328413											-9.05111
																	34.7969	0.157208			107	0.209981			77.7969	0.308864			160.375	0.4			137.199	0.379574			167.812	0.329151											-9.05438
																	34.7969	0.157561			107	0.210452			77.8984	0.309557			160.5	0.400897			137.5	0.380426			167.898	0.329889											-9.05544
																	34.8984	0.157913			108.203	0.210923			77.8984	0.310249			161.312	0.401794			138.5	0.381277			168.594	0.330627											-9.0559
																	34.9004	0.158266			108.398	0.211394			78.5	0.310942			161.312	0.402691			139.195	0.382128			168.594	0.331365											-9.07271
																	34.9062	0.158618			108.703	0.211864			78.7031	0.311634			163	0.403587			139.203	0.382979			168.703	0.332103											-9.07871
																	35	0.158971			108.875	0.212335			78.7998	0.312327			163.5	0.404484			140.602	0.38383			168.812	0.332841											-9.09365
																	35.1992	0.159323			109.398	0.212806			78.8984	0.313019			163.602	0.405381			141.199	0.384681			168.898	0.333579											-9.10912
																	35.2031	0.159676			109.398	0.213277			79.3984	0.313712			164	0.406278			141.594	0.385532			168.906	0.334317											-9.11047
																	35.3008	0.160028			109.5	0.213748			79.6953	0.314404			164.406	0.407175			141.602	0.386383			169	0.335055											-9.1206
																	35.3984	0.160381			109.609	0.214218			79.7031	0.315097			165.594	0.408072			141.898	0.387234			169.199	0.335793											-9.12198
																	35.5	0.160733			109.797	0.214689			79.7969	0.315789			166.203	0.408969			142.199	0.388085			171.703	0.336531											-9.12586
																	35.5	0.161086			110	0.21516			80.1875	0.316482			167.406	0.409865			142.199	0.388936			171.801	0.337269											-9.13169
																	35.5	0.161438			111.195	0.215631			80.1992	0.317175			168.203	0.410762			144.875	0.389787			171.812	0.338007											-9.13274
																	35.8984	0.161791			111.25	0.216102			80.2969	0.317867			169.375	0.411659			145.594	0.390638			171.902	0.338745											-9.15253
																	35.9062	0.162143			111.5	0.216573			80.3906	0.31856			170.297	0.412556			145.797	0.391489			173.688	0.339483											-9.15676
																	36.0938	0.162496			112	0.217043			80.4062	0.319252			170.312	0.413453			146.602	0.39234			173.699	0.340221											-9.16294
																	36.0938	0.162848			112.688	0.217514			80.5	0.319945			170.406	0.41435			147.125	0.393191			173.891	0.340959											-9.16929
																	36.1016	0.163201			112.797	0.217985			80.5	0.320637			171.125	0.415247			147.398	0.394043			175.406	0.341697											-9.18093
																	36.2188	0.163553			112.797	0.218456			80.6016	0.32133			171.5	0.416143			148.4	0.394894			176	0.342435											-9.18397
																	36.2969	0.163906			113.797	0.218927			81	0.322022			172.188	0.41704			148.801	0.395745			176.199	0.343173											-9.18546
																	36.3125	0.164258			113.875	0.219397			81	0.322715			172.406	0.417937			149.801	0.396596			176.594	0.343911											-9.19039
																	36.375	0.164611			113.875	0.219868			81	0.323407			173.102	0.418834			150.199	0.397447			177.102	0.344649											-9.19183
																	36.3984	0.164963			114.594	0.220339			81.2031	0.3241			174.312	0.419731			151	0.398298			177.299	0.345387											-9.19868
																	36.4004	0.165315			114.594	0.22081			81.5	0.324792			174.312	0.420628			152.898	0.399149			178	0.346125											-9.21322
																	36.4004	0.165668			114.609	0.221281			82.0938	0.325485			175	0.421525			153	0.4			179.301	0.346863											-9.23614
																	36.4062	0.16602			114.695	0.221751			82.2188	0.326177			177.094	0.422422			154	0.400851			179.406	0.347601											-9.24219
																	36.5	0.166373			115.297	0.222222			82.3984	0.32687			177.812	0.423318			154.801	0.401702			180.195	0.348339											-9.24432
																	36.5	0.166725			115.602	0.222693			82.7969	0.327562			178.312	0.424215			155	0.402553			181	0.349077											-9.24572
																	36.5	0.167078			116.109	0.223164			82.7969	0.328255			179.098	0.425112			155.199	0.403404			181.201	0.349815											-9.25891
																	36.6016	0.16743			116.125	0.223635			83.6016	0.328947			179.594	0.426009			155.301	0.404255			181.406	0.350554											-9.26291
																	36.7031	0.167783			116.297	0.224105			83.7031	0.32964			180	0.426906			157.297	0.405106			182.438	0.351292											-9.2667
																	36.75	0.168135			116.406	0.224576			83.7969	0.330332			180.094	0.427803			158.797	0.405957			182.594	0.35203											-9.26684
																	36.7969	0.168488			116.5	0.225047			83.8984	0.331025			180.594	0.4287			159.098	0.406809			183.406	0.352768											-9.2975
																	36.8008	0.16884			116.898	0.225518			84	0.331717			181.188	0.429596			161.695	0.40766			183.688	0.353506											-9.30233
																	36.8984	0.169193			117.703	0.225989			84	0.33241			181.703	0.430493			162.102	0.408511			183.902	0.354244											-9.307
																	37.1016	0.169545			118.094	0.22646			84.2969	0.333102			182	0.43139			163.602	0.409362			184.188	0.354982											-9.31387
																	37.1875	0.169898			118.375	0.22693			84.5	0.333795			183.375	0.432287			164.699	0.410213			184.219	0.35572											-9.31433
																	37.1953	0.17025			118.797	0.227401			84.8984	0.334488			183.406	0.433184			165.297	0.411064			184.297	0.356458											-9.31756
																	37.3047	0.170603			119.797	0.227872			85.2031	0.33518			184	0.434081			165.801	0.411915			185.203	0.357196											-9.34743
																	37.3984	0.170955			119.906	0.228343			85.3984	0.335873			185.297	0.434978			167	0.412766			185.406	0.357934											-9.35742
																	37.5	0.171308			120.5	0.228814			86	0.336565			185.594	0.435874			167.5	0.413617			185.406	0.358672											-9.36985
																	37.6016	0.17166			120.598	0.229284			86	0.337258			185.781	0.436771			168.801	0.414468			185.625	0.35941											-9.37429
																	38	0.172013			120.6	0.229755			86	0.33795			186.098	0.437668			169.1	0.415319			186.188	0.360148											-9.37897
																	38	0.172365			121	0.230226			86.6016	0.338643			187	0.438565			169.602	0.41617			186.781	0.360886											-9.38497
																	38.0938	0.172718			121.297	0.230697			86.7031	0.339335			187.906	0.439462			170.402	0.417021			187.406	0.361624											-9.39727
																	38.0938	0.17307			121.812	0.231168			86.7969	0.340028			188.297	0.440359			170.625	0.417872			187.594	0.362362											-9.40257
																	38.0996	0.173423			122.203	0.231638			87	0.34072			188.719	0.441256			170.703	0.418723			188.594	0.3631											-9.40951
																	38.1016	0.173775			122.5	0.232109			87.4003	0.341413			188.906	0.442152			171.699	0.419574			188.625	0.363838											-9.41262
																	38.1953	0.174128			123.5	0.23258			87.5	0.342105			189.594	0.443049			171.703	0.420426			189	0.364576											-9.43222
																	38.1953	0.17448			123.898	0.233051			87.6875	0.342798			189.898	0.443946			172.195	0.421277			189.297	0.365314											-9.43876
																	38.1992	0.174833			124	0.233522			87.7031	0.34349			191.094	0.444843			172.5	0.422128			190.391	0.366052											-9.43992
																	38.3008	0.175185			124.062	0.233992			87.8906	0.344183			191.375	0.44574			174.297	0.422979			191	0.36679											-9.44852
																	38.3047	0.175538			124.375	0.234463			88	0.344875			191.406	0.446637			174.602	0.42383			191.701	0.367528											-9.45806
																	38.3984	0.17589			124.5	0.234934			88.5938	0.345568			192.5	0.447534			177.094	0.424681			192	0.368266											-9.45992
																	38.5	0.176243			124.609	0.235405			88.8047	0.34626			193.398	0.44843			177.188	0.425532			192	0.369004											-9.46263
																	38.625	0.176595			124.625	0.235876			89	0.346953			194.094	0.449327			177.203	0.426383			192.199	0.369742											-9.46533
																	38.7188	0.176947			125.305	0.236347			89.4062	0.347645			194.094	0.450224			177.906	0.427234			192.797	0.37048											-9.46795
																	39	0.1773			125.609	0.236817			89.6953	0.348338			195.797	0.451121			178.297	0.428085			193	0.371218											-9.47252
																	39	0.177652			126.312	0.237288			89.7031	0.34903			196.781	0.452018			178.906	0.428936			194.203	0.371956											-9.47489
																	39.1016	0.178005			126.406	0.237759			89.9062	0.349723			197.281	0.452915			180.406	0.429787			194.602	0.372694											-9.47532
																	39.1016	0.178357			127	0.23823			90.3008	0.350416			197.703	0.453812			182.203	0.430638			194.797	0.373432											-9.48255
																	39.2031	0.17871			127	0.238701			90.5	0.351108			197.781	0.454709			182.398	0.431489			195.5	0.37417											-9.49733
																	39.2969	0.179062			127	0.239171			90.7031	0.351801			198.109	0.455605			182.812	0.43234			196.188	0.374908											-9.50407
																	39.2969	0.179415			127	0.239642			90.9062	0.352493			198.688	0.456502			183.801	0.433191			196.301	0.375646											-9.50885
																	39.2969	0.179767			127.102	0.240113			91.0938	0.353186			199.312	0.457399			183.805	0.434043			196.699	0.376384											-9.5286
																	39.3984	0.18012			127.898	0.240584			91.1094	0.353878			199.688	0.458296			183.875	0.434894			196.703	0.377122											-9.5297
																	39.4023	0.180472			128.125	0.241055			91.5938	0.354571			201	0.459193			185	0.435745			198.301	0.37786											-9.53455
																	39.5	0.180825			128.375	0.241525			91.7969	0.355263			201	0.46009			185.299	0.436596			199.109	0.378598											-9.53537
																	39.5938	0.181177			128.5	0.241996			92.0938	0.355956			201.5	0.460987			185.5	0.437447			200.406	0.379336											-9.5375
																	39.7031	0.18153			128.5	0.242467			92.1953	0.356648			201.812	0.461883			186.102	0.438298			200.406	0.380074											-9.54622
																	39.7969	0.181882			129.109	0.242938			92.2031	0.357341			202.281	0.46278			186.688	0.439149			200.598	0.380812											-9.54705
																	39.875	0.182235			129.203	0.243409			92.8008	0.358033			202.5	0.463677			187.094	0.44			200.906	0.38155											-9.55103
																	39.8984	0.182587			129.5	0.243879			93	0.358726			202.594	0.464574			187.398	0.440851			201.625	0.382288											-9.5603
																	39.8984	0.18294			129.5	0.24435			93	0.359418			202.812	0.465471			188	0.441702			201.625	0.383026											-9.56334
																	40	0.183292			129.695	0.244821			93.2031	0.360111			202.898	0.466368			188.203	0.442553			202.188	0.383764											-9.57102
																	40.125	0.183645			130.391	0.245292			93.3906	0.360803			205.906	0.467265			189.406	0.443404			202.5	0.384502											-9.58114
																	40.2031	0.183997			130.688	0.245763			93.7002	0.361496			206.906	0.468161			189.797	0.444255			203	0.38524											-9.58352
																	40.2031	0.18435			130.703	0.246234			93.7031	0.362188			207.5	0.469058			190.602	0.445106			203.301	0.385978											-9.58403
																	40.3047	0.184702			130.703	0.246704			93.7031	0.362881			208.719	0.469955			190.898	0.445957			203.402	0.386716											-9.5851
																	40.4062	0.185055			130.898	0.247175			93.9062	0.363573			208.812	0.470852			191.699	0.446809			203.812	0.387454											-9.59035
																	40.4062	0.185407			131.805	0.247646			94	0.364266			209.094	0.471749			193.098	0.44766			204.109	0.388192											-9.5968
																	40.5	0.18576			132	0.248117			94.3047	0.364958			210.688	0.472646			194	0.448511			204.406	0.38893											-9.60151
																	40.7969	0.186112			132.406	0.248588			94.5	0.365651			211.688	0.473543			195.297	0.449362			204.598	0.389668											-9.61058
																	40.7969	0.186465			132.703	0.249058			94.6016	0.366343			211.797	0.474439			195.594	0.450213			206.402	0.390406											-9.61239
																	40.8984	0.186817			133.094	0.249529			95	0.367036			212.5	0.475336			195.699	0.451064			206.906	0.391144											-9.61892
																	41	0.18717			133.5	0.25			95.0938	0.367729			214.188	0.476233			197.125	0.451915			207.406	0.391882											-9.61978
																	41.0938	0.187522			133.594	0.250471			95.0938	0.368421			215.602	0.47713			197.602	0.452766			208.207	0.39262											-9.62262
																	41.1016	0.187875			133.688	0.250942			95.3125	0.369114			216.188	0.478027			198.5	0.453617			209.594	0.393358											-9.62851
																	41.1016	0.188227			134.297	0.251412			95.4062	0.369806			216.5	0.478924			199	0.454468			211	0.394096											-9.6363
																	41.2031	0.188579			134.297	0.251883			95.4062	0.370499			216.906	0.479821			199.609	0.455319			211.199	0.394834											-9.63804
																	41.2969	0.188932			135	0.252354			95.8125	0.371191			219.219	0.480717			199.812	0.45617			211.406	0.395572											-9.63863
																	41.2969	0.189284			135.203	0.252825			95.8984	0.371884			219.312	0.481614			200.301	0.457021			212.406	0.39631											-9.65057
																	41.6016	0.189637			136	0.253296			95.8984	0.372576			219.699	0.482511			200.402	0.457872			212.602	0.397048											-9.65735
																	41.6016	0.189989			136.094	0.253766			96.1953	0.373269			220.891	0.483408			200.688	0.458723			213.375	0.397786											-9.66371
																	41.6992	0.190342			136.102	0.254237			96.2969	0.373961			221.906	0.484305			201	0.459574			213.625	0.398524											-9.66918
																	41.7969	0.190694			136.406	0.254708			96.5	0.374654			221.906	0.485202			204.598	0.460426			213.812	0.399262											-9.67289
																	41.8008	0.191047			136.5	0.255179			96.6016	0.375346			222.812	0.486099			204.688	0.461277			216	0.4											-9.67597
																	41.8047	0.191399			137.195	0.25565			96.7031	0.376039			222.898	0.486996			206.398	0.462128			216	0.400738											-9.68104
																	41.8047	0.191752			138.625	0.256121			96.7031	0.376731			223.188	0.487892			206.5	0.462979			216	0.401476											-9.6823
																	41.8047	0.192104			139.297	0.256591			96.8984	0.377424			223.188	0.488789			206.594	0.46383			216.199	0.402214											-9.69186
																	41.8125	0.192457			140.375	0.257062			97.375	0.378116			223.812	0.489686			206.898	0.464681			216.375	0.402952											-9.69363
																	41.9023	0.192809			140.695	0.257533			97.5	0.378809			224.5	0.490583			208.594	0.465532			216.812	0.40369											-9.70756
																	41.9062	0.193162			141.297	0.258004			97.6001	0.379501			226.109	0.49148			209.898	0.466383			217	0.404428											-9.7122
																	41.9062	0.193514			141.898	0.258475			98	0.380194			228.281	0.492377			211.199	0.467234			217.594	0.405166											-9.71349
																	42	0.193867			142.188	0.258945			98	0.380886			228.625	0.493274			212	0.468085			217.793	0.405904											-9.7187
																	42	0.194219			142.301	0.259416			98.1094	0.381579			229.281	0.49417			212.1	0.468936			218	0.406642											-9.72595
																	42	0.194572			142.703	0.259887			98.7031	0.382271			230.281	0.495067			212.391	0.469787			218	0.40738											-9.73959
																	42.1016	0.194924			143	0.260358			98.7031	0.382964			230.594	0.495964			214.102	0.470638			219	0.408118											-9.75391
																	42.1992	0.195277			143.391	0.260829			98.8125	0.383657			231.719	0.496861			214.297	0.471489			220.188	0.408856											-9.75679
																	42.1992	0.195629			143.703	0.261299			99.1001	0.384349			232.281	0.497758			215.305	0.47234			220.406	0.409594											-9.7579
																	42.2969	0.195982			143.703	0.26177			99.1094	0.385042			232.609	0.498655			216.398	0.473191			220.406	0.410332											-9.76072
																	42.2969	0.196334			143.898	0.262241			99.2031	0.385734			233.219	0.499552			216.5	0.474043			220.699	0.41107											-9.76198
																	42.2969	0.196687			144.203	0.262712			99.5938	0.386427			234.125	0.500448			217.406	0.474894			221.406	0.411808											-9.7694
																	42.3008	0.197039			144.297	0.263183			99.6016	0.387119			234.5	0.501345			217.5	0.475745			221.812	0.412546											-9.77764
																	42.3984	0.197392			144.398	0.263653			99.7031	0.387812			235.5	0.502242			218.102	0.476596			222.406	0.413284											-9.78321
																	42.5	0.197744			144.5	0.264124			99.7031	0.388504			236.199	0.503139			219.703	0.477447			222.406	0.414022											-9.79101
																	42.5	0.198097			144.801	0.264595			99.8047	0.389197			236.5	0.504036			220.398	0.478298			223.219	0.41476											-9.79111
																	42.5	0.198449			145.203	0.265066			100	0.389889			237	0.504933			221.098	0.479149			223.301	0.415498											-9.79242
																	42.5938	0.198802			145.602	0.265537			100	0.390582			237	0.50583			221.602	0.48			223.812	0.416236											-9.793
																	42.6016	0.199154			146.5	0.266008			100.203	0.391274			237.188	0.506726			222.398	0.480851			224	0.416974											-9.79622
																	42.6953	0.199507			146.5	0.266478			100.594	0.391967			238.094	0.507623			223.199	0.481702			224.203	0.417712											-9.79623
																	43	0.199859			146.703	0.266949			101.109	0.392659			241	0.50852			224.812	0.482553			225	0.41845											-9.79975
																	43	0.200211			146.906	0.26742			101.398	0.393352			241.188	0.509417			225.594	0.483404			225.594	0.419188											-9.80407
																	43	0.200564			147.102	0.267891			101.891	0.394044			241.594	0.510314			226	0.484255			225.625	0.419926											-9.80835
																	43.0938	0.200916			147.102	0.268362			102	0.394737			242.281	0.511211			228.898	0.485106			225.625	0.420664											-9.8085
																	43.1016	0.201269			148.203	0.268832			102.297	0.395429			242.5	0.512108			229	0.485957			225.812	0.421402											-9.81289
																	43.1875	0.201621			148.805	0.269303			103.203	0.396122			242.594	0.513004			229.199	0.486809			226.297	0.42214											-9.81522
																	43.2031	0.201974			148.812	0.269774			103.4	0.396814			243.297	0.513901			230.797	0.48766			226.375	0.422878											-9.82737
																	43.3008	0.202326			149	0.270245			103.602	0.397507			243.406	0.514798			233.312	0.488511			226.391	0.423616											-9.83056
																	43.5	0.202679			149	0.270716			103.609	0.398199			243.812	0.515695			233.602	0.489362			226.5	0.424354											-9.84259
																	43.5	0.203031			149.094	0.271186			103.703	0.398892			244.875	0.516592			233.898	0.490213			226.688	0.425092											-9.85205
																	43.5996	0.203384			149.188	0.271657			103.812	0.399584			247.094	0.517489			234.199	0.491064			228.406	0.42583											-9.8567
																	43.8984	0.203736			149.703	0.272128			104.062	0.400277			248.312	0.518386			237	0.491915			229.375	0.426568											-9.85998
																	43.9023	0.204089			151.602	0.272599			104.305	0.40097			248.391	0.519283			238.5	0.492766			229.797	0.427306											-9.86076
																	43.9062	0.204441			151.898	0.27307			104.594	0.401662			248.906	0.520179			239.598	0.493617			230.094	0.428044											-9.87761
																	44	0.204794			152	0.27354			104.602	0.402355			252.812	0.521076			240.102	0.494468			230.781	0.428782											-9.87778
																	44.1016	0.205146			152.188	0.274011			104.797	0.403047			253.688	0.521973			241	0.495319			230.898	0.42952											-9.88152
																	44.1016	0.205499			152.602	0.274482			105.094	0.40374			254.281	0.52287			242.199	0.49617			233.812	0.430258											-9.88372
																	44.2031	0.205851			153.5	0.274953			105.109	0.404432			256	0.523767			244.699	0.497021			234.406	0.430996											-9.88668
																	44.2031	0.206204			154.297	0.275424			105.203	0.405125			256.5	0.524664			244.703	0.497872			235.188	0.431734											-9.90429
																	44.4062	0.206556			155	0.275895			105.602	0.405817			258	0.525561			244.902	0.498723			235.375	0.432472											-9.91131
																	44.5938	0.206909			155.398	0.276365			105.914	0.40651			260.406	0.526457			247.891	0.499574			235.406	0.43321											-9.91244
																	44.6016	0.207261			155.906	0.276836			106	0.407202			261	0.527354			248.801	0.500426			235.898	0.433948											-9.91568
																	44.7988	0.207614			156.797	0.277307			106.406	0.407895			261.594	0.528251			249	0.501277			236.219	0.434686											-9.9261
																	45	0.207966			157.695	0.277778			106.406	0.408587			262.094	0.529148			249.391	0.502128			236.812	0.435424											-9.92733
																	45.1016	0.208319			157.938	0.278249			107.203	0.40928			263.406	0.530045			253.688	0.502979			236.812	0.436162											-9.92811
																	45.1875	0.208671			158.199	0.278719			107.5	0.409972			265.812	0.530942			254.125	0.50383			237.094	0.4369											-9.93365
																	45.3984	0.209024			159.398	0.27919			107.5	0.410665			266.703	0.531839			254.195	0.504681			237.594	0.437638											-9.936
																	45.3999	0.209376			159.695	0.279661			107.594	0.411357			266.875	0.532735			254.594	0.505532			240	0.438376											-9.93718
																	45.5	0.209729			160.203	0.280132			107.7	0.41205			267.195	0.533632			254.812	0.506383			240.375	0.439114											-9.93807
																	45.6016	0.210081			160.297	0.280603			108.094	0.412742			267.281	0.534529			255.102	0.507234			240.598	0.439852											-9.94798
																	45.6992	0.210434			160.5	0.281073			108.188	0.413435			267.297	0.535426			256.203	0.508085			240.625	0.44059											-9.95785
																	45.7969	0.210786			160.5	0.281544			108.695	0.414127			267.5	0.536323			257.203	0.508936			241.406	0.441328											-9.95979
																	45.8047	0.211139			160.5	0.282015			109.195	0.41482			269	0.53722			257.699	0.509787			243	0.442066											-9.96178
																	45.8984	0.211491			160.625	0.282486			109.195	0.415512			269.188	0.538117			257.898	0.510638			243	0.442804											-9.9637
																	45.8984	0.211843			161.203	0.282957			109.602	0.416205			271.094	0.539013			258.305	0.511489			243.203	0.443542											-9.96512
																	45.8984	0.212196			161.688	0.283427			109.703	0.416898			272.797	0.53991			258.703	0.51234			244	0.44428											-9.96713
																	45.9062	0.212548			161.797	0.283898			109.797	0.41759			274.695	0.540807			259.203	0.513191			244.406	0.445018											-9.97455
																	45.9062	0.212901			163.875	0.284369			109.898	0.418283			276.602	0.541704			259.5	0.514043			246.402	0.445756											-9.97632
																	46	0.213253			164	0.28484			110.188	0.418975			277.203	0.542601			260.297	0.514894			246.438	0.446494											-9.97824
																	46	0.213606			164	0.285311			110.5	0.419668			277.812	0.543498			260.398	0.515745			246.594	0.447232											-9.98559
																	46.1016	0.213958			164.391	0.285782			110.695	0.42036			278	0.544395			260.602	0.516596			246.812	0.44797											-9.9908
																	46.2031	0.214311			164.75	0.286252			110.906	0.421053			278.312	0.545291			261.703	0.517447			248.188	0.448708											-9.99094
																	46.3984	0.214663			165	0.286723			111.297	0.421745			278.5	0.546188			264.602	0.518298			250.594	0.449446											-9.9922
																	46.3984	0.215016			165.102	0.287194			111.797	0.422438			280.094	0.547085			265	0.519149			251	0.450185											-9.99406
																	46.7031	0.215368			165.203	0.287665			111.812	0.42313			281	0.547982			265.094	0.52			251.094	0.450923											-9.99512
																	46.7188	0.215721			165.594	0.288136			111.898	0.423823			281.219	0.548879			265.301	0.520851			251.594	0.451661											-9.99569
																	46.7969	0.216073			165.598	0.288606			112.203	0.424515			281.312	0.549776			265.5	0.521702			252.812	0.452399											-10.0028
																	46.8047	0.216426			165.703	0.289077			112.203	0.425208			283.281	0.550673			266.797	0.522553			253.406	0.453137											-10.0186
																	46.8125	0.216778			165.801	0.289548			112.312	0.4259			285.219	0.55157			267.203	0.523404			254.188	0.453875											-10.0302
																	46.9004	0.217131			165.812	0.290019			112.5	0.426593			285.688	0.552466			269.598	0.524255			255	0.454613											-10.0587
																	47	0.217483			165.812	0.29049			112.5	0.427285			286.594	0.553363			270.402	0.525106			255.102	0.455351											-10.0611
																	47	0.217836			166	0.29096			112.703	0.427978			286.688	0.55426			270.797	0.525957			255.781	0.456089											-10.0665
																	47	0.218188			166.5	0.291431			112.703	0.42867			286.688	0.555157			271.203	0.526809			255.781	0.456827											-10.0692
																	47.0938	0.218541			166.695	0.291902			113	0.429363			287	0.556054			272.602	0.52766			256.5	0.457565											-10.0694
																	47.1875	0.218893			166.703	0.292373			113.391	0.430055			287.125	0.556951			272.898	0.528511			256.891	0.458303											-10.0723
																	47.1953	0.219246			167.5	0.292844			113.594	0.430748			287.219	0.557848			274.398	0.529362			258.406	0.459041											-10.0872
																	47.2188	0.219598			167.594	0.293315			113.594	0.43144			287.5	0.558744			275.199	0.530213			258.812	0.459779											-10.0883
																	47.2969	0.219951			168.109	0.293785			113.805	0.432133			288	0.559641			275.301	0.531064			260.781	0.460517											-10.0986
																	47.375	0.220303			168.195	0.294256			114	0.432825			289.5	0.560538			276.203	0.531915			261.203	0.461255											-10.1016
																	47.5	0.220656			169	0.294727			114.406	0.433518			290	0.561435			277.125	0.532766			261.688	0.461993											-10.1029
																	47.6006	0.221008			169.797	0.295198			114.703	0.434211			290.203	0.562332			277.398	0.533617			262	0.462731											-10.1049
																	47.6953	0.221361			170	0.295669			114.703	0.434903			290.812	0.563229			277.703	0.534468			263.402	0.463469											-10.1056
																	47.6992	0.221713			170.406	0.296139			114.797	0.435596			292.102	0.564126			278.188	0.535319			263.812	0.464207											-10.1226
																	47.7031	0.222066			170.594	0.29661			115.699	0.436288			292.188	0.565022			278.199	0.53617			265	0.464945											-10.127
																	48	0.222418			171	0.297081			115.797	0.436981			292.781	0.565919			278.594	0.537021			265.188	0.465683											-10.1297
																	48	0.222771			171.805	0.297552			116.695	0.437673			292.891	0.566816			278.797	0.537872			265.5	0.466421											-10.1313
																	48.1016	0.223123			172.281	0.298023			116.781	0.438366			293.102	0.567713			280	0.538723			266.5	0.467159											-10.1343
																	48.1875	0.223476			172.398	0.298493			116.797	0.439058			294.312	0.56861			280	0.539574			267.594	0.467897											-10.1381
																	48.2002	0.223828			172.688	0.298964			117.094	0.439751			297.812	0.569507			280.297	0.540426			267.812	0.468635											-10.1396
																	48.2002	0.22418			172.797	0.299435			117.195	0.440443			298.797	0.570404			280.688	0.541277			268	0.469373											-10.1402
																	48.2969	0.224533			173.5	0.299906			117.305	0.441136			298.906	0.5713			280.703	0.542128			268.703	0.470111											-10.1414
																	48.3047	0.224885			173.602	0.300377			117.5	0.441828			299.781	0.572197			280.801	0.542979			269.391	0.470849											-10.1614
																	48.4004	0.225238			173.609	0.300847			118.195	0.442521			300.594	0.573094			281.594	0.54383			269.703	0.471587											-10.1668
																	48.4062	0.22559			173.688	0.301318			118.5	0.443213			302.406	0.573991			281.906	0.544681			270	0.472325											-10.1682
																	48.5	0.225943			174	0.301789			118.594	0.443906			305.797	0.574888			282.797	0.545532			270.594	0.473063											-10.1724
																	48.5	0.226295			174.805	0.30226			118.898	0.444598			306.406	0.575785			284.609	0.546383			270.781	0.473801											-10.1796
																	48.6016	0.226648			174.906	0.302731			119.219	0.445291			309.688	0.576682			285	0.547234			272.406	0.474539											-10.1845
																	48.7031	0.227			175.5	0.303202			119.305	0.445983			311.781	0.577578			285.902	0.548085			272.594	0.475277											-10.2076
																	48.8984	0.227353			176.094	0.303672			120	0.446676			312.5	0.578475			286.094	0.548936			273	0.476015											-10.2168
																	49	0.227705			176.594	0.304143			120.305	0.447368			314	0.579372			287.305	0.549787			273	0.476753											-10.2171
																	49.0977	0.228058			177.094	0.304614			120.797	0.448061			314.891	0.580269			287.5	0.550638			274	0.477491											-10.2201
																	49.1016	0.22841			177.805	0.305085			120.898	0.448753			317.203	0.581166			288.203	0.551489			274.609	0.478229											-10.2268
																	49.2969	0.228763			178.195	0.305556			121.102	0.449446			317.391	0.582063			289.297	0.55234			274.699	0.478967											-10.2326
																	49.3047	0.229115			178.398	0.306026			122	0.450139			317.801	0.58296			291.688	0.553191			275.797	0.479705											-10.2354
																	49.6006	0.229468			179.281	0.306497			122.102	0.450831			319.812	0.583857			293	0.554043			276.188	0.480443											-10.2456
																	49.6016	0.22982			179.297	0.306968			122.398	0.451524			320.406	0.584753			298.398	0.554894			276.406	0.481181											-10.2462
																	49.7012	0.230173			179.297	0.307439			122.797	0.452216			320.602	0.58565			298.602	0.555745			277.594	0.481919											-10.2488
																	49.8047	0.230525			179.5	0.30791			123.203	0.452909			320.801	0.586547			299	0.556596			278.797	0.482657											-10.2665
																	49.9062	0.230878			179.703	0.30838			123.5	0.453601			321.203	0.587444			301	0.557447			278.906	0.483395											-10.275
																	50	0.23123			180	0.308851			123.609	0.454294			323	0.588341			301.102	0.558298			279.812	0.484133											-10.2768
																	50.1953	0.231583			180.391	0.309322			123.906	0.454986			323.094	0.589238			302.109	0.559149			280	0.484871											-10.2855
																	50.4062	0.231935			180.398	0.309793			124.203	0.455679			323.312	0.590135			303.188	0.56			280.5	0.485609											-10.2858
																	50.5	0.232288			180.703	0.310264			124.5	0.456371			324.406	0.591031			303.301	0.560851			281.188	0.486347											-10.2927
																	50.5	0.23264			180.812	0.310734			125.188	0.457064			324.688	0.591928			304.801	0.561702			281.375	0.487085											-10.2971
																	50.6016	0.232993			180.898	0.311205			125.188	0.457756			324.797	0.592825			306.201	0.562553			281.406	0.487823											-10.2994
																	50.6953	0.233345			181.5	0.311676			125.598	0.458449			325.406	0.593722			306.402	0.563404			281.812	0.488561											-10.3103
																	50.7031	0.233698			181.797	0.312147			126.188	0.459141			326.906	0.594619			306.902	0.564255			281.902	0.489299											-10.3186
																	51	0.23405			182.5	0.312618			126.805	0.459834			327.5	0.595516			308.797	0.565106			283.781	0.490037											-10.3389
																	51	0.234403			182.602	0.313089			127.094	0.460526			329.094	0.596413			308.898	0.565957			286.188	0.490775											-10.359
																	51.0938	0.234755			182.75	0.313559			127.297	0.461219			329.297	0.597309			309	0.566809			286.594	0.491513											-10.3633
																	51.2031	0.235108			183.125	0.31403			127.406	0.461911			332.5	0.598206			311.094	0.56766			287.406	0.492251											-10.3815
																	51.2969	0.23546			183.125	0.314501			127.703	0.462604			332.625	0.599103			311.301	0.568511			287.812	0.492989											-10.3828
																	51.2969	0.235812			183.312	0.314972			127.703	0.463296			333.188	0.6			314.391	0.569362			289.906	0.493727											-10.403
																	51.3008	0.236165			183.898	0.315443			127.797	0.463989			335	0.600897			316.188	0.570213			291.203	0.494465											-10.4086
																	51.4004	0.236517			184.102	0.315913			128.297	0.464681			337.203	0.601794			318.398	0.571064			291.203	0.495203											-10.4093
																	51.5	0.23687			184.688	0.316384			128.398	0.465374			337.219	0.602691			320.297	0.571915			292.406	0.495941											-10.4381
																	51.6016	0.237222			184.898	0.316855			128.812	0.466066			338	0.603587			320.701	0.572766			292.609	0.496679											-10.4499
																	51.6875	0.237575			185.188	0.317326			129.203	0.466759			339.5	0.604484			324.297	0.573617			294.594	0.497417											-10.4682
																	51.7969	0.237927			185.305	0.317797			129.5	0.467452			341.125	0.605381			325.805	0.574468			294.812	0.498155											-10.4788
																	51.8984	0.23828			185.391	0.318267			129.594	0.468144			344.906	0.606278			326.102	0.575319			295.188	0.498893											-10.4921
																	51.9004	0.238632			185.797	0.318738			129.602	0.468837			345.297	0.607175			327.5	0.57617			295.812	0.499631											-10.4942
																	51.9023	0.238985			186.5	0.319209			129.703	0.469529			346.094	0.608072			328.305	0.577021			299.406	0.500369											-10.4991
																	52	0.239337			186.602	0.31968			129.805	0.470222			347.812	0.608969			330.301	0.577872			299.812	0.501107											-10.4993
																	52	0.23969			186.695	0.320151			130.406	0.470914			349.125	0.609865			331.098	0.578723			300.375	0.501845											-10.501
																	52.1016	0.240042			186.805	0.320621			130.609	0.471607			349.594	0.610762			333.297	0.579574			300.781	0.502583											-10.5018
																	52.1016	0.240395			187.125	0.321092			130.703	0.472299			351.109	0.611659			334.6	0.580426			300.898	0.503321											-10.522
																	52.1875	0.240747			187.602	0.321563			130.812	0.472992			354.406	0.612556			338.102	0.581277			302.094	0.504059											-10.5293
																	52.2812	0.2411			187.898	0.322034			131.203	0.473684			354.5	0.613453			339.805	0.582128			302.188	0.504797											-10.5314
																	52.2969	0.241452			188.688	0.322505			131.398	0.474377			356.312	0.61435			340.305	0.582979			302.219	0.505535											-10.5527
																	52.3125	0.241805			189.281	0.322976			131.5	0.475069			356.594	0.615247			340.602	0.58383			302.699	0.506273											-10.5592
																	52.4062	0.242157			189.812	0.323446			131.695	0.475762			358.5	0.616143			344	0.584681			303.812	0.507011											-10.5599
																	52.5	0.24251			190.305	0.323917			131.695	0.476454			358.602	0.61704			344.1	0.585532			305.219	0.507749											-10.564
																	52.5	0.242862			190.5	0.324388			132	0.477147			359.203	0.617937			344.391	0.586383			305.701	0.508487											-10.5665
																	52.5	0.243215			191	0.324859			132	0.477839			360.891	0.618834			345	0.587234			306.375	0.509225											-10.5671
																	52.6016	0.243567			191.094	0.32533			132.406	0.478532			363.5	0.619731			347.281	0.588085			307.703	0.509963											-10.5768
																	52.7031	0.24392			191.203	0.3258			132.797	0.479224			363.5	0.620628			347.297	0.588936			307.812	0.510701											-10.5846
																	52.7969	0.244272			191.5	0.326271			132.906	0.479917			363.5	0.621525			348	0.589787			309.594	0.511439											-10.5915
																	53	0.244625			191.5	0.326742			132.914	0.480609			370.812	0.622422			349	0.590638			310.188	0.512177											-10.5936
																	53.1016	0.244977			191.594	0.327213			133	0.481302			373.594	0.623318			350.602	0.591489			310.5	0.512915											-10.6104
																	53.3008	0.24533			191.703	0.327684			133.1	0.481994			373.906	0.624215			351	0.59234			310.805	0.513653											-10.6201
																	53.3984	0.245682			191.719	0.328154			133.5	0.482687			374.094	0.625112			351.602	0.593191			311.188	0.514391											-10.6292
																	53.5	0.246035			193.203	0.328625			133.5	0.48338			376.281	0.626009			352.098	0.594043			312.699	0.515129											-10.6329
																	53.5	0.246387			193.688	0.329096			133.5	0.484072			376.5	0.626906			354.094	0.594894			314.5	0.515867											-10.6385
																	53.6016	0.24674			193.898	0.329567			133.5	0.484765			376.594	0.627803			354.695	0.595745			314.812	0.516605											-10.642
																	53.7969	0.247092			193.898	0.330038			133.797	0.485457			378.812	0.6287			360.688	0.596596			317.812	0.517343											-10.6557
																	54.1016	0.247444			196.195	0.330508			133.812	0.48615			380.688	0.629596			362.5	0.597447			318.781	0.518081											-10.6561
																	54.2188	0.247797			196.5	0.330979			133.906	0.486842			381	0.630493			364.5	0.598298			319.199	0.518819											-10.6582
																	54.5	0.248149			196.5	0.33145			134	0.487535			381.398	0.63139			364.898	0.599149			319.391	0.519557											-10.6632
																	54.6016	0.248502			196.703	0.331921			134.199	0.488227			382.688	0.632287			365.5	0.6			319.402	0.520295											-10.6664
																	54.6016	0.248854			196.797	0.332392			134.594	0.48892			387.094	0.633184			365.601	0.600851			320	0.521033											-10.6671
																	54.7031	0.249207			197	0.332863			134.906	0.489612			388.906	0.634081			366.5	0.601702			320	0.521771											-10.6682
																	54.7031	0.249559			197.391	0.333333			135.188	0.490305			389.109	0.634978			366.695	0.602553			320	0.522509											-10.6688
																	54.7969	0.249912			199.297	0.333804			135.688	0.490997			389.594	0.635874			366.898	0.603404			321.109	0.523247											-10.685
																	54.8984	0.250264			199.5	0.334275			135.902	0.49169			390.719	0.636771			370.602	0.604255			322.703	0.523985											-10.6964
																	54.9062	0.250617			199.812	0.334746			135.906	0.492382			391.094	0.637668			371.695	0.605106			324.781	0.524723											-10.6992
																	55	0.250969			199.812	0.335217			136.195	0.493075			393.5	0.638565			372	0.605957			325.201	0.525461											-10.7118
																	55	0.251322			200.602	0.335687			136.203	0.493767			400.5	0.639462			374.699	0.606809			325.5	0.526199											-10.7161
																	55	0.251674			200.797	0.336158			136.203	0.49446			402.281	0.640359			376.102	0.60766			325.781	0.526937											-10.7325
																	55.2969	0.252027			201.602	0.336629			136.406	0.495152			402.594	0.641256			376.391	0.608511			326.594	0.527675											-10.7331
																	55.3008	0.252379			201.906	0.3371			136.695	0.495845			403.5	0.642152			377.195	0.609362			327.301	0.528413											-10.7374
																	55.5	0.252732			202	0.337571			136.797	0.496537			405.5	0.643049			377.805	0.610213			328	0.529151											-10.7413
																	55.5625	0.253084			202.195	0.338041			137	0.49723			405.594	0.643946			377.906	0.611064			328	0.529889											-10.7444
																	55.6875	0.253437			202.594	0.338512			137.797	0.497922			406.406	0.644843			378.699	0.611915			330.406	0.530627											-10.7447
																	55.6875	0.253789			203.219	0.338983			137.797	0.498615			406.406	0.64574			379.098	0.612766			330.594	0.531365											-10.7663
																	55.75	0.254142			203.297	0.339454			138	0.499307			408.398	0.646637			379.203	0.613617			331.391	0.532103											-10.7699
																	55.8125	0.254494			203.398	0.339925			138.398	0.5			408.875	0.647534			380.102	0.614468			332.188	0.532841											-10.7744
																	56	0.254847			203.797	0.340395			139.594	0.500693			409.391	0.64843			383.281	0.615319			332.594	0.533579											-10.7851
																	56	0.255199			205.703	0.340866			140	0.501385			409.609	0.649327			383.719	0.61617			333.801	0.534317											-10.79
																	56.2969	0.255552			205.797	0.341337			140.094	0.502078			411	0.650224			385	0.617021			334.219	0.535055											-10.7921
																	56.3984	0.255904			205.898	0.341808			140.102	0.50277			414.805	0.651121			385.301	0.617872			334.797	0.535793											-10.8001
																	56.4023	0.256257			206	0.342279			140.109	0.503463			418	0.652018			387.219	0.618723			336	0.536531											-10.8004
																	56.4062	0.256609			206.188	0.34275			141.797	0.504155			419.5	0.652915			388.703	0.619574			336	0.537269											-10.802
																	56.5	0.256962			206.5	0.34322			142.094	0.504848			420	0.653812			394.406	0.620426			336.102	0.538007											-10.8021
																	56.6875	0.257314			206.75	0.343691			142.094	0.50554			423.898	0.654709			400	0.621277			337.812	0.538745											-10.8046
																	56.6992	0.257667			207.5	0.344162			142.297	0.506233			424.898	0.655605			401	0.622128			338	0.539483											-10.8125
																	56.7988	0.258019			209	0.344633			144.406	0.506925			425	0.656502			401	0.622979			338.301	0.540221											-10.8166
																	56.8984	0.258372			209.594	0.345104			144.5	0.507618			425.281	0.657399			406.703	0.62383			339.598	0.540959											-10.8197
																	57	0.258724			210.094	0.345574			144.6	0.50831			426.406	0.658296			407	0.624681			339.699	0.541697											-10.8208
																	57.2812	0.259076			210.594	0.346045			144.891	0.509003			426.703	0.659193			409.5	0.625532			339.906	0.542435											-10.8211
																	57.2969	0.259429			210.699	0.346516			144.898	0.509695			427.906	0.66009			409.703	0.626383			340.602	0.543173											-10.831
																	57.2969	0.259781			211.102	0.346987			145.102	0.510388			432.703	0.660987			410.898	0.627234			341.598	0.543911											-10.8323
																	57.3984	0.260134			211.391	0.347458			145.406	0.51108			433.5	0.661883			411.594	0.628085			341.625	0.544649											-10.8512
																	57.6001	0.260486			212	0.347928			145.703	0.511773			435.102	0.66278			414.188	0.628936			343	0.545387											-10.8539
																	57.6875	0.260839			212	0.348399			145.797	0.512465			435.688	0.663677			417.301	0.629787			343.703	0.546125											-10.8569
																	57.7002	0.261191			212.5	0.34887			145.906	0.513158			439.5	0.664574			419.703	0.630638			344.594	0.546863											-10.8687
																	57.7988	0.261544			213	0.349341			146	0.51385			444.688	0.665471			424.098	0.631489			344.781	0.547601											-10.8738
																	57.8984	0.261896			213.699	0.349812			146.102	0.514543			445.719	0.666368			424.906	0.63234			344.902	0.548339											-10.8837
																	58.0938	0.262249			214	0.350282			146.297	0.515235			447.375	0.667265			425.102	0.633191			345.391	0.549077											-10.8846
																	58.1016	0.262601			214.102	0.350753			146.594	0.515928			447.406	0.668161			425.594	0.634043			345.891	0.549815											-10.8974
																	58.2188	0.262954			214.398	0.351224			147.328	0.51662			448.406	0.669058			426.301	0.634894			346	0.550554											-10.8985
																	58.2969	0.263306			214.398	0.351695			147.391	0.517313			448.5	0.669955			426.5	0.635745			347.594	0.551292											-10.9015
																	58.3008	0.263659			214.5	0.352166			147.602	0.518006			450.891	0.670852			431.906	0.636596			347.695	0.55203											-10.9076
																	58.5	0.264011			215.094	0.352637			147.812	0.518698			452.703	0.671749			432.5	0.637447			348	0.552768											-10.917
																	58.5938	0.264364			215.203	0.353107			148.5	0.519391			452.812	0.672646			433.799	0.638298			348.297	0.553506											-10.9175
																	58.9062	0.264716			215.602	0.353578			148.625	0.520083			455.203	0.673543			435.297	0.639149			348.594	0.554244											-10.9272
																	59.1016	0.265069			216.5	0.354049			148.699	0.520776			455.594	0.674439			437.301	0.64			349.312	0.554982											-10.928
																	59.1016	0.265421			216.594	0.35452			149.391	0.521468			457.801	0.675336			439.406	0.640851			350.812	0.55572											-10.9285
																	59.1016	0.265774			216.906	0.354991			149.391	0.522161			462.703	0.676233			440.312	0.641702			352.188	0.556458											-10.9298
																	59.2969	0.266126			218.406	0.355461			149.719	0.522853			465.906	0.67713			440.398	0.642553			353.188	0.557196											-10.9307
																	59.3125	0.266479			218.5	0.355932			149.891	0.523546			468.398	0.678027			442.688	0.643404			354.188	0.557934											-10.9316
																	59.375	0.266831			218.5	0.356403			150	0.524238			468.719	0.678924			444.203	0.644255			357.625	0.558672											-10.9321
																	59.3984	0.267184			219	0.356874			150.094	0.524931			471.594	0.679821			444.801	0.645106			358.188	0.55941											-10.936
																	59.6992	0.267536			219.031	0.357345			150.281	0.525623			475.719	0.680717			444.906	0.645957			358.781	0.560148											-10.9417
																	60	0.267889			219.406	0.357815			150.301	0.526316			479.391	0.681614			446.699	0.646809			358.902	0.560886											-10.9422
																	60	0.268241			219.609	0.358286			150.805	0.527008			480.5	0.682511			447.902	0.64766			360	0.561624											-10.9557
																	60	0.268594			219.906	0.358757			150.891	0.527701			481.094	0.683408			449.102	0.648511			361.598	0.562362											-10.9608
																	60	0.268946			220.203	0.359228			151.102	0.528393			481.5	0.684305			452.098	0.649362			361.703	0.5631											-10.982
																	60.0996	0.269299			220.703	0.359699			151.203	0.529086			485.188	0.685202			452.305	0.650213			361.703	0.563838											-10.9854
																	60.1016	0.269651			221.703	0.360169			151.891	0.529778			486.203	0.686099			454.797	0.651064			364.406	0.564576											-11.0017
																	60.3047	0.270004			221.805	0.36064			152.203	0.530471			486.891	0.686996			456.891	0.651915			364.594	0.565314											-11.0072
																	60.5	0.270356			221.898	0.361111			152.297	0.531163			488.875	0.687892			457.703	0.652766			366.375	0.566052											-11.0105
																	60.5	0.270708			222.125	0.361582			154	0.531856			490.188	0.688789			457.898	0.653617			366.602	0.56679											-11.0137
																	60.5	0.271061			222.5	0.362053			154.102	0.532548			490.312	0.689686			458.5	0.654468			366.797	0.567528											-11.0188
																	60.5977	0.271413			222.5	0.362524			154.203	0.533241			490.902	0.690583			460.398	0.655319			367.406	0.568266											-11.0221
																	60.6016	0.271766			222.5	0.362994			155	0.533934			491	0.69148			461.797	0.65617			367.594	0.569004											-11.0258
																	60.6016	0.272118			223.797	0.363465			155	0.534626			491	0.692377			461.906	0.657021			368.797	0.569742											-11.0295
																	60.6016	0.272471			224.699	0.363936			155.102	0.535319			491.688	0.693274			471	0.657872			369.188	0.57048											-11.0481
																	60.625	0.272823			225.188	0.364407			155.102	0.536011			491.699	0.69417			472.902	0.658723			369.625	0.571218											-11.051
																	60.7988	0.273176			225.188	0.364878			155.297	0.536704			492.406	0.695067			473.594	0.659574			369.898	0.571956											-11.0625
																	60.8984	0.273528			225.305	0.365348			155.719	0.537396			492.609	0.695964			476.094	0.660426			370.781	0.572694											-11.0637
																	61.0938	0.273881			225.625	0.365819			156.094	0.538089			493.219	0.696861			477.703	0.661277			371	0.573432											-11.0687
																	61.1016	0.274233			226.188	0.36629			156.797	0.538781			495.406	0.697758			480.5	0.662128			372	0.57417											-11.0718
																	61.2031	0.274586			227.297	0.366761			157.406	0.539474			495.797	0.698655			482.297	0.662979			373.219	0.574908											-11.0732
																	61.5	0.274938			227.938	0.367232			157.5	0.540166			497.688	0.699552			484.695	0.66383			373.898	0.575646											-11.0758
																	61.6016	0.275291			228	0.367702			157.688	0.540859			498.5	0.700448			485.398	0.664681			374.801	0.576384											-11.0834
																	61.6016	0.275643			229.094	0.368173			157.805	0.541551			500.102	0.701345			490.297	0.665532			374.812	0.577122											-11.0864
																	61.6992	0.275996			229.297	0.368644			158	0.542244			502.398	0.702242			494.5	0.666383			374.898	0.57786											-11.0881
																	61.6992	0.276348			229.398	0.369115			158.609	0.542936			504.875	0.703139			494.699	0.667234			375	0.578598											-11.0907
																	61.8984	0.276701			229.406	0.369586			159.203	0.543629			507.602	0.704036			496.297	0.668085			376.188	0.579336											-11.0916
																	61.9062	0.277053			229.602	0.370056			159.281	0.544321			508	0.704933			497.902	0.668936			376.391	0.580074											-11.097
																	62	0.277406			229.797	0.370527			159.797	0.545014			509.406	0.70583			507.398	0.669787			377.797	0.580812											-11.1006
																	62.0938	0.277758			230.102	0.370998			159.898	0.545706			514.297	0.706726			509.125	0.670638			378.609	0.58155											-11.1078
																	62.0938	0.278111			230.305	0.371469			159.898	0.546399			518.391	0.707623			511.703	0.671489			379.188	0.582288											-11.1168
																	62.0996	0.278463			230.5	0.37194			160.102	0.547091			522.688	0.70852			513.188	0.67234			380.375	0.583026											-11.1264
																	62.1875	0.278816			230.602	0.372411			160.406	0.547784			528.406	0.709417			514.5	0.673191			382.188	0.583764											-11.1287
																	62.2031	0.279168			231.594	0.372881			160.5	0.548476			529.906	0.710314			516.5	0.674043			382.594	0.584502											-11.1354
																	62.2031	0.279521			232.297	0.373352			160.906	0.549169			532.312	0.711211			516.812	0.674894			386.391	0.58524											-11.1411
																	62.2969	0.279873			232.5	0.373823			161.102	0.549861			534.5	0.712108			519	0.675745			388	0.585978											-11.149
																	62.3906	0.280226			232.594	0.374294			161.598	0.550554			535.297	0.713004			519.219	0.676596			389.406	0.586716											-11.1601
																	62.3984	0.280578			232.797	0.374765			162	0.551247			535.797	0.713901			519.906	0.677447			389.781	0.587454											-11.1618
																	62.5	0.280931			233	0.375235			162.195	0.551939			540.281	0.714798			520.102	0.678298			391	0.588192											-11.1694
																	62.5	0.281283			233.602	0.375706			162.5	0.552632			542.203	0.715695			521.598	0.679149			392	0.58893											-11.1797
																	62.5977	0.281636			234.5	0.376177			162.5	0.553324			542.406	0.716592			523.805	0.68			392.906	0.589668											-11.1808
																	62.6016	0.281988			234.5	0.376648			162.586	0.554017			545.594	0.717489			526.094	0.680851			393.703	0.590406											-11.1848
																	62.6875	0.282341			234.609	0.377119			163	0.554709			545.695	0.718386			527.312	0.681702			393.902	0.591144											-11.1871
																	62.6953	0.282693			234.801	0.377589			163.297	0.555402			546.094	0.719283			528.602	0.682553			394.906	0.591882											-11.1965
																	62.875	0.283045			235.5	0.37806			164	0.556094			550.703	0.720179			529.5	0.683404			397.781	0.59262											-11.2043
																	62.9062	0.283398			235.594	0.378531			164.805	0.556787			555	0.721076			530.102	0.684255			400.5	0.593358											-11.2059
																	62.9062	0.28375			236	0.379002			165.305	0.557479			556.906	0.721973			530.391	0.685106			401.188	0.594096											-11.2116
																	62.9062	0.284103			236.875	0.379473			165.406	0.558172			558	0.72287			531.5	0.685957			401.396	0.594834											-11.2127
																	63.3984	0.284455			238.094	0.379944			165.914	0.558864			558.875	0.723767			534.5	0.686809			401.406	0.595572											-11.2149
																	63.5	0.284808			238.125	0.380414			166	0.559557			559.406	0.724664			536.195	0.68766			402.797	0.59631											-11.2154
																	63.6992	0.28516			238.312	0.380885			166.2	0.560249			566.195	0.725561			536.898	0.688511			402.812	0.597048											-11.2178
																	63.7812	0.285513			238.5	0.381356			166.203	0.560942			567.203	0.726457			537	0.689362			404.5	0.597786											-11.2224
																	63.7969	0.285865			238.609	0.381827			166.797	0.561634			567.5	0.727354			537.297	0.690213			405.188	0.598524											-11.2284
																	63.8008	0.286218			239	0.382298			167	0.562327			568.797	0.728251			537.781	0.691064			406.594	0.599262											-11.2413
																	63.9004	0.28657			239.898	0.382768			167.406	0.563019			572.203	0.729148			539.602	0.691915			407.098	0.6											-11.2413
																	64	0.286923			240.602	0.383239			167.594	0.563712			573.406	0.730045			540.805	0.692766			407.812	0.600738											-11.2428
																	64	0.287275			240.695	0.38371			167.703	0.564404			574.094	0.730942			547.594	0.693617			408.625	0.601476											-11.2489
																	64.1016	0.287628			241	0.384181			167.898	0.565097			583.094	0.731839			551.719	0.694468			409.703	0.602214											-11.258
																	64.2812	0.28798			241.102	0.384652			168.188	0.565789			584.906	0.732735			554.297	0.695319			410.094	0.602952											-11.2581
																	64.6016	0.288333			241.312	0.385122			168.305	0.566482			585.195	0.733632			555.902	0.69617			411.406	0.60369											-11.259
																	64.6992	0.288685			241.609	0.385593			168.609	0.567175			585.594	0.734529			556.109	0.697021			412	0.604428											-11.2591
																	64.8984	0.289038			242.5	0.386064			168.797	0.567867			591.688	0.735426			557.102	0.697872			412.406	0.605166											-11.2628
																	65.3984	0.28939			243.5	0.386535			169	0.56856			593.094	0.736323			558.5	0.698723			414	0.605904											-11.268
																	65.5938	0.289743			245.102	0.387006			169.398	0.569252			597.219	0.73722			560.5	0.699574			415.812	0.606642											-11.2753
																	65.6016	0.290095			245.5	0.387476			169.5	0.569945			597.406	0.738117			564.098	0.700426			417	0.60738											-11.2758
																	65.6992	0.290448			245.5	0.387947			169.7	0.570637			600.801	0.739013			564.5	0.701277			417.219	0.608118											-11.2766
																	65.8047	0.2908			246.094	0.388418			169.703	0.57133			605.188	0.73991			564.797	0.702128			418.094	0.608856											-11.2804
																	66.125	0.291153			246.297	0.388889			169.797	0.572022			605.391	0.740807			564.875	0.702979			418.602	0.609594											-11.2814
																	66.1953	0.291505			246.391	0.38936			170.109	0.572715			609.688	0.741704			565.094	0.70383			419.695	0.610332											-11.2934
																	66.3008	0.291858			246.812	0.389831			170.5	0.573407			613.199	0.742601			565.703	0.704681			420.898	0.61107											-11.2986
																	66.5	0.29221			247	0.390301			170.602	0.5741			614.906	0.743498			567.098	0.705532			422.297	0.611808											-11.3011
																	66.7012	0.292563			247.203	0.390772			170.797	0.574792			616.797	0.744395			568.688	0.706383			423.219	0.612546											-11.3035
																	66.8008	0.292915			247.406	0.391243			171	0.575485			618.594	0.745291			568.797	0.707234			423.594	0.613284											-11.3103
																	67	0.293268			247.5	0.391714			171.297	0.576177			621.109	0.746188			571.812	0.708085			424.406	0.614022											-11.3132
																	67	0.29362			247.5	0.392185			171.375	0.57687			622.695	0.747085			574.875	0.708936			424.594	0.61476											-11.3161
																	67.0996	0.293973			247.688	0.392655			171.5	0.577562			626.305	0.747982			578.801	0.709787			424.781	0.615498											-11.3212
																	67.2031	0.294325			248.102	0.393126			171.609	0.578255			626.594	0.748879			580.102	0.710638			425.219	0.616236											-11.3231
																	67.375	0.294677			248.109	0.393597			171.797	0.578947			628.805	0.749776			581.602	0.711489			425.562	0.616974											-11.324
																	67.3984	0.29503			248.812	0.394068			171.891	0.57964			635	0.750673			582.398	0.71234			425.594	0.617712											-11.3468
																	67.6016	0.295382			249.5	0.394539			172	0.580332			646.5	0.75157			583.602	0.713191			425.801	0.61845											-11.3468
																	67.6992	0.295735			249.598	0.395009			172.1	0.581025			652.094	0.752466			589.398	0.714043			428	0.619188											-11.3493
																	67.875	0.296087			250.703	0.39548			172.102	0.581717			653.5	0.753363			595.5	0.714894			429.5	0.619926											-11.351
																	67.8999	0.29644			250.906	0.395951			172.902	0.58241			661.203	0.75426			597.102	0.715745			432	0.620664											-11.3583
																	68	0.296792			250.906	0.396422			172.906	0.583102			667.406	0.755157			597.406	0.716596			432.199	0.621402											-11.3598
																	68.1875	0.297145			251.1	0.396893			173.906	0.583795			669.688	0.756054			599.199	0.717447			433.301	0.62214											-11.3607
																	68.1953	0.297497			251.305	0.397363			174.094	0.584488			679.188	0.756951			600.5	0.718298			433.5	0.622878											-11.3649
																	68.3008	0.29785			251.875	0.397834			174.398	0.58518			685.094	0.757848			601.5	0.719149			434.898	0.623616											-11.377
																	68.3906	0.298202			252.203	0.398305			175.297	0.585873			687.297	0.758744			604.699	0.72			435.188	0.624354											-11.3776
																	68.5	0.298555			253.199	0.398776			175.609	0.586565			687.609	0.759641			606	0.720851			435.203	0.625092											-11.3819
																	68.7969	0.298907			254.102	0.399247			175.797	0.587258			688.297	0.760538			606.5	0.721702			435.297	0.62583											-11.4011
																	69	0.29926			254.195	0.399718			176.3	0.58795			693.602	0.761435			608.102	0.722553			435.812	0.626568											-11.4012
																	69.2031	0.299612			254.195	0.400188			176.391	0.588643			696.602	0.762332			610.5	0.723404			436.188	0.627306											-11.4062
																	69.25	0.299965			254.602	0.400659			177.5	0.589335			698.5	0.763229			611.094	0.724255			437.102	0.628044											-11.4119
																	69.4004	0.300317			255.094	0.40113			177.805	0.590028			704.906	0.764126			612.703	0.725106			437.898	0.628782											-11.4173
																	69.5	0.30067			255.25	0.401601			178	0.59072			705.312	0.765022			620.398	0.725957			438	0.62952											-11.4247
																	69.5	0.301022			255.594	0.402072			178.398	0.591413			708.094	0.765919			622.406	0.726809			439.102	0.630258											-11.4263
																	69.5977	0.301375			255.602	0.402542			179	0.592105			713.5	0.766816			623.695	0.72766			439.188	0.630996											-11.4283
																	69.75	0.301727			256.094	0.403013			179.203	0.592798			723.906	0.767713			627.301	0.728511			440	0.631734											-11.4325
																	69.9062	0.30208			256.102	0.403484			179.203	0.59349			725.891	0.76861			627.402	0.729362			444.094	0.632472											-11.4372
																	70.0977	0.302432			256.297	0.403955			179.391	0.594183			728.109	0.769507			628.312	0.730213			445.406	0.63321											-11.4402
																	70.2031	0.302785			257.391	0.404426			179.797	0.594875			730.094	0.770404			629.102	0.731064			447.5	0.633948											-11.4499
																	70.2188	0.303137			258.094	0.404896			180	0.595568			733.703	0.7713			633.102	0.731915			447.902	0.634686											-11.4551
																	70.3047	0.30349			258.594	0.405367			180.602	0.59626			734.594	0.772197			633.812	0.732766			448.594	0.635424											-11.4566
																	70.5	0.303842			259.398	0.405838			181	0.596953			739.406	0.773094			634.688	0.733617			449.594	0.636162											-11.4616
																	70.6992	0.304195			259.406	0.406309			181.781	0.597645			746.102	0.773991			640	0.734468			451	0.6369											-11.466
																	70.8008	0.304547			259.75	0.40678			181.797	0.598338			752.699	0.774888			640.5	0.735319			451.406	0.637638											-11.4707
																	71	0.3049			260.094	0.40725			182.109	0.59903			753.812	0.775785			641.801	0.73617			452.625	0.638376											-11.4753
																	71.0938	0.305252			260.199	0.407721			182.297	0.599723			755.719	0.776682			643	0.737021			454.594	0.639114											-11.4768
																	71.1875	0.305605			260.203	0.408192			182.5	0.600416			760.398	0.777578			643.219	0.737872			454.703	0.639852											-11.4837
																	71.2969	0.305957			260.609	0.408663			184.195	0.601108			762.812	0.778475			647.703	0.738723			456.406	0.64059											-11.4989
																	71.5	0.306309			261	0.409134			184.805	0.601801			766.109	0.779372			649.102	0.739574			458.602	0.641328											-11.5013
																	71.6875	0.306662			261.199	0.409605			185.398	0.602493			766.5	0.780269			652.301	0.740426			459	0.642066											-11.5064
																	71.7031	0.307014			261.703	0.410075			185.406	0.603186			773.906	0.781166			654.094	0.741277			461.094	0.642804											-11.5276
																	71.8984	0.307367			262.406	0.410546			186.602	0.603878			776.094	0.782063			657.281	0.742128			462	0.643542											-11.5469
																	72	0.307719			262.688	0.411017			186.891	0.604571			781.906	0.78296			658.398	0.742979			463.5	0.64428											-11.5521
																	72.1016	0.308072			262.703	0.411488			187.297	0.605263			785.703	0.783857			658.719	0.74383			464.594	0.645018											-11.5696
																	72.1016	0.308424			262.906	0.411959			188	0.605956			802.594	0.784753			659	0.744681			465.375	0.645756											-11.5702
																	72.3008	0.308777			263.301	0.412429			188	0.606648			803	0.78565			660.5	0.745532			466.5	0.646494											-11.5709
																	72.3047	0.309129			264.203	0.4129			188.188	0.607341			805.297	0.786547			661.5	0.746383			468.188	0.647232											-11.5744
																	72.3984	0.309482			264.812	0.413371			188.203	0.608033			814.703	0.787444			662	0.747234			469.5	0.64797											-11.5747
																	72.5	0.309834			265.094	0.413842			188.398	0.608726			817.094	0.788341			669	0.748085			469.812	0.648708											-11.5758
																	72.6992	0.310187			265.188	0.414313			188.5	0.609418			824.094	0.789238			669.297	0.748936			470	0.649446											-11.5808
																	72.8008	0.310539			265.312	0.414783			188.5	0.610111			824.781	0.790135			669.875	0.749787			471.891	0.650185											-11.5886
																	72.8047	0.310892			265.688	0.415254			188.797	0.610803			837.102	0.791031			670.797	0.750638			475	0.650923											-11.5899
																	72.8984	0.311244			265.801	0.415725			188.797	0.611496			838.805	0.791928			672.297	0.751489			475.812	0.651661											-11.5961
																	72.8984	0.311597			266.188	0.416196			189	0.612188			842.797	0.792825			672.301	0.75234			477.219	0.652399											-11.5963
																	73	0.311949			267.094	0.416667			189.297	0.612881			851.906	0.793722			677.199	0.753191			477.594	0.653137											-11.5977
																	73.125	0.312302			267.703	0.417137			189.906	0.613573			852.598	0.794619			680.703	0.754043			478.688	0.653875											-11.6015
																	73.3125	0.312654			267.812	0.417608			190.219	0.614266			853.102	0.795516			681.203	0.754894			479.199	0.654613											-11.6025
																	73.4062	0.313007			267.906	0.418079			190.805	0.614958			853.7	0.796413			685.094	0.755745			479.5	0.655351											-11.6035
																	73.5	0.313359			268.688	0.41855			190.906	0.615651			856.406	0.797309			686.902	0.756596			479.594	0.656089											-11.6044
																	73.6016	0.313712			269.094	0.419021			191.094	0.616343			856.906	0.798206			692.094	0.757447			480.188	0.656827											-11.6068
																	73.7969	0.314064			270	0.419492			191.906	0.617036			857.406	0.799103			697	0.758298			480.896	0.657565											-11.6084
																	73.8984	0.314417			270	0.419962			192.5	0.617729			860.688	0.8			700.5	0.759149			483.188	0.658303											-11.6221
																	73.9375	0.314769			270.703	0.420433			192.688	0.618421			867.188	0.800897			700.719	0.76			483.781	0.659041											-11.6259
																	74.2812	0.315122			270.703	0.420904			192.797	0.619114			868.203	0.801794			701.602	0.760851			484.406	0.659779											-11.6413
																	74.2969	0.315474			271.299	0.421375			193.094	0.619806			874	0.802691			704.594	0.761702			484.812	0.660517											-11.6423
																	74.5	0.315827			271.703	0.421846			194.203	0.620499			877	0.803587			705.398	0.762553			488.219	0.661255											-11.6447
																	74.5625	0.316179			272	0.422316			195.594	0.621191			878.406	0.804484			707.703	0.763404			489.188	0.661993											-11.6517
																	74.5938	0.316532			272.406	0.422787			196.805	0.621884			879.094	0.805381			713.5	0.764255			489.402	0.662731											-11.6628
																	74.8003	0.316884			272.594	0.423258			196.898	0.622576			882.094	0.806278			714.805	0.765106			491.701	0.663469											-11.673
																	74.875	0.317237			272.688	0.423729			197.195	0.623269			882.219	0.807175			715.094	0.765957			492.375	0.664207											-11.6737
																	74.9062	0.317589			272.898	0.4242			197.398	0.623961			886.906	0.808072			717.297	0.766809			494.906	0.664945											-11.6914
																	75	0.317941			273.102	0.42467			197.797	0.624654			888.609	0.808969			718.203	0.76766			495.902	0.665683											-11.6963
																	75.1016	0.318294			274.391	0.425141			198.188	0.625346			890.594	0.809865			730.203	0.768511			496	0.666421											-11.7014
																	75.2969	0.318646			274.594	0.425612			198.375	0.626039			891	0.810762			735.219	0.769362			496.375	0.667159											-11.7073
																	75.2969	0.318999			275	0.426083			198.602	0.626731			892	0.811659			737.781	0.770213			498.199	0.667897											-11.711
																	75.2969	0.319351			275.297	0.426554			198.609	0.627424			895.703	0.812556			740	0.771064			498.602	0.668635											-11.7171
																	75.3125	0.319704			275.805	0.427024			198.703	0.628116			898.398	0.813453			743.602	0.771915			498.812	0.669373											-11.7174
																	75.3984	0.320056			275.812	0.427495			199.203	0.628809			903.301	0.81435			747.5	0.772766			498.812	0.670111											-11.7343
																	75.8008	0.320409			276.102	0.427966			199.398	0.629501			905.891	0.815247			752.398	0.773617			498.812	0.670849											-11.7363
																	76.1016	0.320761			276.188	0.428437			200.102	0.630194			910.406	0.816143			758.609	0.774468			499.188	0.671587											-11.743
																	76.1992	0.321114			276.5	0.428908			200.695	0.630886			912.281	0.81704			758.703	0.775319			500.594	0.672325											-11.7503
																	76.3008	0.321466			276.5	0.429379			201.203	0.631579			918	0.817937			759.219	0.77617			503.195	0.673063											-11.7556
																	76.375	0.321819			276.801	0.429849			201.602	0.632271			922.094	0.818834			767.188	0.777021			504.781	0.673801											-11.7556
																	76.375	0.322171			277.602	0.43032			202.5	0.632964			922.906	0.819731			768.297	0.777872			505.203	0.674539											-11.7561
																	76.5	0.322524			277.805	0.430791			202.609	0.633657			923	0.820628			770.102	0.778723			505.406	0.675277											-11.7568
																	76.5	0.322876			279.203	0.431262			202.625	0.634349			924.5	0.821525			770.195	0.779574			506.406	0.676015											-11.7578
																	76.5938	0.323229			279.297	0.431733			202.812	0.635042			927.5	0.822422			774.797	0.780426			508.406	0.676753											-11.7639
																	76.6016	0.323581			279.594	0.432203			203.5	0.635734			931.398	0.823318			775.312	0.781277			509.375	0.677491											-11.7724
																	76.7969	0.323934			279.797	0.432674			203.797	0.636427			931.703	0.824215			785.312	0.782128			510.402	0.678229											-11.7781
																	76.9062	0.324286			280.391	0.433145			203.898	0.637119			932.602	0.825112			785.594	0.782979			515.594	0.678967											-11.7832
																	77.0938	0.324639			281.203	0.433616			205	0.637812			934.898	0.826009			789.203	0.78383			519.188	0.679705											-11.7886
																	77.1016	0.324991			281.5	0.434087			205.109	0.638504			939.188	0.826906			799.996	0.784681			519.812	0.680443											-11.7915
																	77.1016	0.325344			281.906	0.434557			205.188	0.639197			940.602	0.827803			801.902	0.785532			523.188	0.681181											-11.7951
																	77.1992	0.325696			282.5	0.435028			205.406	0.639889			942.609	0.8287			806	0.786383			523.201	0.681919											-11.8042
																	77.2188	0.326049			282.5	0.435499			206.094	0.640582			947.094	0.829596			806.102	0.787234			524.391	0.682657											-11.8113
																	77.3047	0.326401			282.602	0.43597			206.406	0.641274			947.297	0.830493			806.5	0.788085			524.898	0.683395											-11.8121
																	77.6016	0.326754			283.703	0.436441			207.391	0.641967			947.5	0.83139			806.801	0.788936			525	0.684133											-11.814
																	78.5	0.327106			283.797	0.436911			207.406	0.642659			947.902	0.832287			807.301	0.789787			525.699	0.684871											-11.8142
																	78.5	0.327459			283.898	0.437382			207.688	0.643352			954.594	0.833184			813.594	0.790638			527.219	0.685609											-11.8256
																	78.5	0.327811			284.406	0.437853			209.195	0.644044			959.297	0.834081			819.102	0.791489			528.406	0.686347											-11.8293
																	78.5996	0.328164			284.5	0.438324			210.305	0.644737			975	0.834978			825.199	0.79234			528.594	0.687085											-11.8308
																	78.6016	0.328516			284.703	0.438795			210.797	0.645429			980.406	0.835874			835.719	0.793191			529	0.687823											-11.8322
																	78.6992	0.328869			284.898	0.439266			211.5	0.646122			981	0.836771			836.094	0.794043			531.203	0.688561											-11.8383
																	78.7998	0.329221			285.406	0.439736			212	0.646814			981.703	0.837668			838.5	0.794894			532.594	0.689299											-11.8389
																	78.8008	0.329573			286.5	0.440207			212.203	0.647507			984.203	0.838565			838.875	0.795745			534.406	0.690037											-11.8448
																	78.8047	0.329926			286.594	0.440678			212.406	0.648199			985.5	0.839462			840.906	0.796596			534.812	0.690775											-11.8466
																	78.9062	0.330278			286.906	0.441149			213	0.648892			986.805	0.840359			843.699	0.797447			535.5	0.691513											-11.8487
																	79	0.330631			288.281	0.44162			213.312	0.649584			991.5	0.841256			848.6	0.798298			535.625	0.692251											-11.8519
																	79	0.330983			289.398	0.44209			213.5	0.650277			992.297	0.842152			849	0.799149			539.609	0.692989											-11.8618
																	79.3906	0.331336			290.391	0.442561			214	0.65097			1005.5	0.843049			854.906	0.8			540	0.693727											-11.8662
																	79.3984	0.331688			290.5	0.443032			214.625	0.651662			1006.5	0.843946			863	0.800851			542.104	0.694465											-11.8717
																	79.4004	0.332041			290.609	0.443503			215.5	0.652355			1016.91	0.844843			863.898	0.801702			542.5	0.695203											-11.8797
																	79.4004	0.332393			290.703	0.443974			215.602	0.653047			1029.2	0.84574			866.406	0.802553			543.625	0.695941											-11.8801
																	79.4062	0.332746			290.906	0.444444			215.797	0.65374			1039.8	0.846637			866.5	0.803404			546.219	0.696679											-11.8804
																	79.5938	0.333098			291.094	0.444915			215.805	0.654432			1041.3	0.847534			868.5	0.804255			548.812	0.697417											-11.8805
																	79.7031	0.333451			291.297	0.445386			216.199	0.655125			1045	0.84843			870.199	0.805106			551.406	0.698155											-11.8805
																	80	0.333803			291.797	0.445857			216.398	0.655817			1046.81	0.849327			872.7	0.805957			551.594	0.698893											-11.8826
																	80.0938	0.334156			292.602	0.446328			216.797	0.65651			1055.19	0.850224			875.281	0.806809			551.898	0.699631											-11.8848
																	80.1953	0.334508			293.898	0.446798			217.398	0.657202			1060.39	0.851121			879.297	0.80766			552.594	0.700369											-11.8895
																	80.2998	0.334861			294.805	0.447269			218.406	0.657895			1064.41	0.852018			883.594	0.808511			553.406	0.701107											-11.8921
																	80.4004	0.335213			294.898	0.44774			219	0.658587			1066.3	0.852915			891.301	0.809362			554.203	0.701845											-11.9024
																	80.5	0.335566			295.5	0.448211			219.094	0.65928			1069.2	0.853812			892.402	0.810213			555.906	0.702583											-11.912
																	80.5	0.335918			296.5	0.448682			219.312	0.659972			1072.41	0.854709			893	0.811064			556.188	0.703321											-11.9219
																	80.7988	0.336271			296.703	0.449153			219.594	0.660665			1072.59	0.855605			895.703	0.811915			558.188	0.704059											-11.94
																	80.7988	0.336623			296.805	0.449623			220.195	0.661357			1079.91	0.856502			897.695	0.812766			563.812	0.704797											-11.9407
																	80.8994	0.336976			297.402	0.450094			220.398	0.66205			1081.3	0.857399			900.301	0.813617			566.898	0.705535											-11.9445
																	81	0.337328			298	0.450565			220.5	0.662742			1104.1	0.858296			906.094	0.814468			568.438	0.706273											-11.9472
																	81.1016	0.337681			298.297	0.451036			220.594	0.663435			1106.2	0.859193			913	0.815319			572.102	0.707011											-11.9487
																	81.4062	0.338033			298.406	0.451507			220.898	0.664127			1121.7	0.86009			913.703	0.81617			576	0.707749											-11.9601
																	81.4062	0.338386			298.812	0.451977			221	0.66482			1136	0.860987			917.094	0.817021			577	0.708487											-11.9656
																	81.4062	0.338738			298.898	0.452448			221.602	0.665512			1143.9	0.861883			919.219	0.817872			582.703	0.709225											-11.9673
																	81.6016	0.339091			299.5	0.452919			222	0.666205			1153.31	0.86278			920.199	0.818723			583.609	0.709963											-11.9766
																	81.6016	0.339443			300	0.45339			222	0.666898			1164.2	0.863677			923.594	0.819574			585.188	0.710701											-11.9789
																	81.8008	0.339796			300.398	0.453861			222.195	0.66759			1166.7	0.864574			927.406	0.820426			586.594	0.711439											-12.0056
																	81.8047	0.340148			300.602	0.454331			222.203	0.668283			1178.2	0.865471			927.5	0.821277			586.781	0.712177											-12.0086
																	82	0.340501			301.297	0.454802			222.602	0.668975			1189.19	0.866368			929.797	0.822128			589.109	0.712915											-12.0123
																	82	0.340853			302.125	0.455273			223.102	0.669668			1189.61	0.867265			932.602	0.822979			590	0.713653											-12.0142
																	82	0.341205			303	0.455744			223.891	0.67036			1194.59	0.868161			948.195	0.82383			590.375	0.714391											-12.0179
																	82	0.341558			303.402	0.456215			224.297	0.671053			1196.8	0.869058			949.594	0.824681			590.812	0.715129											-12.0219
																	82.0938	0.34191			303.5	0.456685			224.391	0.671745			1208.7	0.869955			949.801	0.825532			594	0.715867											-12.0252
																	82.1016	0.342263			303.812	0.457156			224.801	0.672438			1219.8	0.870852			952.297	0.826383			595.799	0.716605											-12.0263
																	82.1992	0.342615			304	0.457627			225.703	0.67313			1221.6	0.871749			955.898	0.827234			597.594	0.717343											-12.0321
																	82.2812	0.342968			304.109	0.458098			225.812	0.673823			1233	0.872646			955.906	0.828085			597.812	0.718081											-12.0363
																	82.5	0.34332			304.25	0.458569			226.102	0.674515			1235.09	0.873543			960.602	0.828936			598	0.718819											-12.0381
																	82.5	0.343673			304.703	0.45904			227.195	0.675208			1244.3	0.874439			963.094	0.829787			598.398	0.719557											-12.039
																	82.5625	0.344025			304.812	0.45951			228.906	0.6759			1250.7	0.875336			964.398	0.830638			599.188	0.720295											-12.0471
																	82.7031	0.344378			304.812	0.459981			229	0.676593			1252.5	0.876233			973.094	0.831489			599.406	0.721033											-12.0473
																	83	0.34473			305.5	0.460452			229.609	0.677285			1258.78	0.87713			974.703	0.83234			600.594	0.721771											-12.0474
																	83.1016	0.345083			305.609	0.460923			231.406	0.677978			1262.5	0.878027			976.398	0.833191			600.812	0.722509											-12.0501
																	83.2188	0.345435			305.703	0.461394			232	0.67867			1277.8	0.878924			977.695	0.834043			601.801	0.723247											-12.0595
																	83.2969	0.345788			305.797	0.461864			233.301	0.679363			1280.8	0.879821			978.406	0.834894			602.625	0.723985											-12.0625
																	83.5	0.34614			306.098	0.462335			234	0.680055			1282.39	0.880717			979.5	0.835745			603.781	0.724723											-12.0633
																	83.6016	0.346493			307.5	0.462806			234	0.680748			1282.89	0.881614			980.719	0.836596			604.406	0.725461											-12.0702
																	83.6875	0.346845			307.5	0.463277			234	0.68144			1325.3	0.882511			980.805	0.837447			604.438	0.726199											-12.085
																	83.7031	0.347198			307.602	0.463748			234.301	0.682133			1331.59	0.883408			981.906	0.838298			608.812	0.726937											-12.0863
																	83.7988	0.34755			307.898	0.464218			234.797	0.682825			1344.7	0.884305			983.188	0.839149			610.406	0.727675											-12.1005
																	83.8984	0.347903			308	0.464689			235	0.683518			1348.41	0.885202			985.594	0.84			610.5	0.728413											-12.1049
																	84	0.348255			308.188	0.46516			235.801	0.684211			1363.91	0.886099			993.594	0.840851			610.594	0.729151											-12.1088
																	84.3008	0.348608			308.219	0.465631			235.805	0.684903			1369.69	0.886996			997.5	0.841702			611.562	0.729889											-12.1178
																	84.3008	0.34896			308.297	0.466102			235.906	0.685596			1372.69	0.887892			1006.88	0.842553			612	0.730627											-12.118
																	84.3984	0.349313			308.297	0.466573			236.391	0.686288			1378	0.888789			1012.8	0.843404			615.594	0.731365											-12.1286
																	84.4023	0.349665			310.398	0.467043			237.312	0.686981			1402.7	0.889686			1022.7	0.844255			616.812	0.732103											-12.1408
																	84.5996	0.350018			310.602	0.467514			237.406	0.687673			1408	0.890583			1036.91	0.845106			617	0.732841											-12.1464
																	84.5996	0.35037			312.703	0.467985			238.406	0.688366			1408.91	0.89148			1040.22	0.845957			618	0.733579											-12.1502
																	84.6875	0.350723			313.195	0.468456			238.703	0.689058			1411	0.892377			1040.4	0.846809			619	0.734317											-12.1559
																	84.75	0.351075			314.297	0.468927			240.102	0.689751			1439.91	0.893274			1043.3	0.84766			621.188	0.735055											-12.1704
																	84.875	0.351428			315.898	0.469397			240.406	0.690443			1459.59	0.89417			1046.81	0.848511			622	0.735793											-12.1735
																	85	0.35178			315.898	0.469868			240.805	0.691136			1462.3	0.895067			1051.41	0.849362			622.201	0.736531											-12.1743
																	85	0.352133			316.219	0.470339			241	0.691828			1468.8	0.895964			1057.31	0.850213			627.406	0.737269											-12.1836
																	85.0977	0.352485			316.391	0.47081			241.5	0.692521			1471.2	0.896861			1058.9	0.851064			629.562	0.738007											-12.1946
																	85.1016	0.352838			316.688	0.471281			242.203	0.693213			1476.5	0.897758			1074	0.851915			629.602	0.738745											-12.1981
																	85.3008	0.35319			316.688	0.471751			242.391	0.693906			1478.61	0.898655			1081.1	0.852766			631.102	0.739483											-12.2162
																	85.4023	0.353542			317.203	0.472222			242.398	0.694598			1483.91	0.899552			1083	0.853617			637.594	0.740221											-12.2192
																	85.6992	0.353895			318.094	0.472693			244.406	0.695291			1495	0.900448			1083.5	0.854468			637.812	0.740959											-12.2224
																	85.7031	0.354247			319.203	0.473164			246.094	0.695983			1525.62	0.901345			1089.09	0.855319			641.594	0.741697											-12.2234
																	85.9004	0.3546			319.5	0.473635			246.297	0.696676			1526.5	0.902242			1089.5	0.85617			643.201	0.742435											-12.2273
																	86	0.354952			320.199	0.474105			246.797	0.697368			1535.59	0.903139			1091.1	0.857021			644.625	0.743173											-12.2386
																	86.1016	0.355305			321.5	0.474576			247.203	0.698061			1546.7	0.904036			1098.41	0.857872			646.406	0.743911											-12.2391
																	86.1992	0.355657			322	0.475047			248.688	0.698753			1566.6	0.904933			1102.6	0.858723			647.625	0.744649											-12.2504
																	86.2188	0.35601			322.5	0.475518			249	0.699446			1575.09	0.90583			1103.8	0.859574			647.781	0.745387											-12.2526
																	86.375	0.356362			322.906	0.475989			249.5	0.700139			1592.59	0.906726			1108.09	0.860426			647.812	0.746125											-12.2612
																	86.3906	0.356715			323.5	0.47646			249.5	0.700831			1603.5	0.907623			1112.5	0.861277			648.812	0.746863											-12.2629
																	86.8994	0.357067			326.094	0.47693			249.898	0.701524			1610.19	0.90852			1117.7	0.862128			655.188	0.747601											-12.2639
																	87	0.35742			327.188	0.477401			250.699	0.702216			1610.5	0.909417			1119.1	0.862979			656.188	0.748339											-12.274
																	87	0.357772			327.406	0.477872			251.094	0.702909			1616.78	0.910314			1119.1	0.86383			662.406	0.749077											-12.2745
																	87.125	0.358125			327.906	0.478343			251.598	0.703601			1641.09	0.911211			1122.69	0.864681			663.4	0.749815											-12.2789
																	87.1875	0.358477			328.301	0.478814			252.094	0.704294			1663.91	0.912108			1123.7	0.865532			673.602	0.750554											-12.2888
																	87.2002	0.35883			328.5	0.479284			252.203	0.704986			1667.7	0.913004			1123.91	0.866383			673.781	0.751292											-12.2952
																	87.2969	0.359182			329.312	0.479755			252.609	0.705679			1688	0.913901			1125.9	0.867234			674.406	0.75203											-12.2952
																	87.2969	0.359535			329.703	0.480226			253	0.706371			1698.2	0.914798			1127.89	0.868085			675	0.752768											-12.3015
																	87.3984	0.359887			329.906	0.480697			254.805	0.707064			1706.5	0.915695			1134.8	0.868936			675.188	0.753506											-12.3034
																	87.4004	0.36024			330.312	0.481168			255.098	0.707756			1732.09	0.916592			1143.19	0.869787			676.098	0.754244											-12.3074
																	87.4375	0.360592			330.688	0.481638			257.094	0.708449			1751.1	0.917489			1149.1	0.870638			677.601	0.754982											-12.3139
																	87.5625	0.360945			330.805	0.482109			257.398	0.709141			1761.78	0.918386			1159.5	0.871489			679.188	0.75572											-12.3237
																	87.8125	0.361297			331	0.48258			257.695	0.709834			1762.7	0.919283			1165.8	0.87234			680.812	0.756458											-12.3302
																	87.8984	0.36165			331.297	0.483051			258.094	0.710526			1769.2	0.920179			1176.8	0.873191			681	0.757196											-12.3306
																	88	0.362002			331.5	0.483522			259	0.711219			1777.2	0.921076			1183.8	0.874043			682	0.757934											-12.331
																	88.0977	0.362355			331.688	0.483992			259.602	0.711911			1782.2	0.921973			1188.2	0.874894			683.594	0.758672											-12.3364
																	88.2812	0.362707			332	0.484463			259.602	0.712604			1801.9	0.92287			1192.41	0.875745			684.312	0.75941											-12.3365
																	88.2998	0.36306			332.094	0.484934			260.195	0.713296			1814.7	0.923767			1204.91	0.876596			686.602	0.760148											-12.3474
																	88.3984	0.363412			332.906	0.485405			262.203	0.713989			1823.61	0.924664			1206.7	0.877447			691.406	0.760886											-12.3478
																	88.5	0.363765			333	0.485876			262.203	0.714681			1824.2	0.925561			1211.5	0.878298			692.098	0.761624											-12.3525
																	88.5	0.364117			333.5	0.486347			262.219	0.715374			1824.8	0.926457			1211.7	0.879149			694	0.762362											-12.3568
																	88.5	0.36447			334.398	0.486817			263.402	0.716066			1828.62	0.927354			1215.3	0.88			699.5	0.7631											-12.3574
																	88.8008	0.364822			334.5	0.487288			263.805	0.716759			1846.61	0.928251			1218	0.880851			700	0.763838											-12.3637
																	88.8984	0.365174			334.602	0.487759			264.195	0.717452			1850.5	0.929148			1223.7	0.881702			703.219	0.764576											-12.3663
																	89.1016	0.365527			335.801	0.48823			264.297	0.718144			1857.8	0.930045			1228.7	0.882553			711.688	0.765314											-12.3757
																	89.1992	0.365879			336.094	0.488701			264.406	0.718837			1869.59	0.930942			1231.3	0.883404			713.625	0.766052											-12.4026
																	89.1992	0.366232			336.301	0.489171			265	0.719529			1918	0.931839			1232.6	0.884255			714.299	0.76679											-12.4158
																	89.2969	0.366584			336.875	0.489642			265.398	0.720222			1967.11	0.932735			1255.3	0.885106			716.594	0.767528											-12.4187
																	89.3125	0.366937			337.188	0.490113			266.188	0.720914			1992.8	0.933632			1259.2	0.885957			717.188	0.768266											-12.4244
																	89.375	0.367289			337.797	0.490584			266.305	0.721607			2004	0.934529			1285.22	0.886809			723.188	0.769004											-12.4289
																	89.5938	0.367642			338	0.491055			266.672	0.722299			2046.5	0.935426			1299	0.88766			724	0.769742											-12.4353
																	89.8984	0.367994			338.406	0.491525			266.797	0.722992			2048.5	0.936323			1316.19	0.888511			724	0.77048											-12.4356
																	90	0.368347			338.703	0.491996			267.102	0.723684			2053.4	0.93722			1318.3	0.889362			725.594	0.771218											-12.4405
																	90.2031	0.368699			339.609	0.492467			267.297	0.724377			2080	0.938117			1320.2	0.890213			726.188	0.771956											-12.4426
																	90.2969	0.369052			339.699	0.492938			267.594	0.725069			2082.5	0.939013			1330.41	0.891064			729.6	0.772694											-12.4437
																	90.5	0.369404			340.312	0.493409			267.898	0.725762			2086.5	0.93991			1331.8	0.891915			729.625	0.773432											-12.446
																	90.6875	0.369757			341	0.493879			269.602	0.726454			2124.3	0.940807			1336.41	0.892766			730.406	0.77417											-12.4464
																	90.8984	0.370109			341.094	0.49435			269.703	0.727147			2135.11	0.941704			1352	0.893617			730.5	0.774908											-12.447
																	91.1016	0.370462			341.805	0.494821			270.703	0.727839			2136.09	0.942601			1355.8	0.894468			730.801	0.775646											-12.4567
																	91.2031	0.370814			342.891	0.495292			271	0.728532			2162.3	0.943498			1367.4	0.895319			735.188	0.776384											-12.4648
																	91.4062	0.371167			343.203	0.495763			271.703	0.729224			2163.91	0.944395			1367.91	0.89617			738.406	0.777122											-12.4676
																	91.5	0.371519			344.297	0.496234			274.5	0.729917			2172.7	0.945291			1373.2	0.897021			746	0.77786											-12.474
																	91.5	0.371872			344.297	0.496704			274.5	0.730609			2187.09	0.946188			1374.28	0.897872			747.562	0.778598											-12.4741
																	91.5	0.372224			347.5	0.497175			275.406	0.731302			2207.8	0.947085			1382.7	0.898723			748.781	0.779336											-12.4776
																	91.5977	0.372577			347.602	0.497646			275.797	0.731994			2209.89	0.947982			1384.09	0.899574			748.805	0.780074											-12.479
																	91.6016	0.372929			347.703	0.498117			275.898	0.732687			2240.6	0.948879			1386.5	0.900426			748.812	0.780812											-12.4793
																	91.8008	0.373282			347.902	0.498588			275.906	0.73338			2245	0.949776			1389.3	0.901277			752	0.78155											-12.4949
																	91.9004	0.373634			348.398	0.499058			276	0.734072			2254.91	0.950673			1402.91	0.902128			752.219	0.782288											-12.4951
																	92.0996	0.373987			349.609	0.499529			276.203	0.734765			2268.8	0.95157			1412.41	0.902979			753	0.783026											-12.4958
																	92.1875	0.374339			350	0.5			276.703	0.735457			2270.6	0.952466			1419.8	0.90383			755.562	0.783764											-12.4958
																	92.4375	0.374692			350.297	0.500471			276.938	0.73615			2321.91	0.953363			1442.81	0.904681			757	0.784502											-12.4995
																	92.5996	0.375044			351.898	0.500942			277.102	0.736842			2436.39	0.95426			1443.2	0.905532			758.5	0.78524											-12.5029
																	92.8008	0.375397			352.102	0.501412			277.219	0.737535			2498.1	0.955157			1471.41	0.906383			759.406	0.785978											-12.5123
																	92.8047	0.375749			352.906	0.501883			279	0.738227			2512	0.956054			1471.7	0.907234			760.703	0.786716											-12.5194
																	92.8125	0.376102			354.406	0.502354			279.109	0.73892			2515.3	0.956951			1482.3	0.908085			761	0.787454											-12.5336
																	92.8125	0.376454			354.902	0.502825			280.5	0.739612			2628.7	0.957848			1490.9	0.908936			761.406	0.788192											-12.5392
																	92.8984	0.376806			355.406	0.503296			280.805	0.740305			2652.2	0.958744			1497.5	0.909787			762.812	0.78893											-12.5467
																	93.1016	0.377159			356.195	0.503766			281.203	0.740997			2670	0.959641			1506.9	0.910638			766.406	0.789668											-12.5551
																	93.3984	0.377511			356.875	0.504237			281.398	0.74169			2679	0.960538			1507.8	0.911489			771.301	0.790406											-12.5581
																	93.6953	0.377864			357	0.504708			282.297	0.742382			2709.2	0.961435			1522.1	0.91234			774	0.791144											-12.564
																	93.7002	0.378216			357.094	0.505179			285.199	0.743075			2716.5	0.962332			1544	0.913191			774.219	0.791882											-12.567
																	93.7031	0.378569			357.5	0.50565			285.297	0.743767			2723.61	0.963229			1552	0.914043			776.438	0.79262											-12.5724
																	93.7031	0.378921			358.297	0.506121			285.5	0.74446			2747.91	0.964126			1563.5	0.914894			777.781	0.793358											-12.5739
																	93.8047	0.379274			358.906	0.506591			286	0.745152			2807.09	0.965022			1564.5	0.915745			777.812	0.794096											-12.5831
																	93.9062	0.379626			360.406	0.507062			286.094	0.745845			2818.61	0.965919			1564.5	0.916596			781.188	0.794834											-12.5845
																	94	0.379979			361.188	0.507533			286.398	0.746537			2819	0.966816			1564.9	0.917447			781.406	0.795572											-12.589
																	94	0.380331			361.203	0.508004			287.297	0.74723			2847	0.967713			1571.09	0.918298			781.594	0.79631											-12.5905
																	94	0.380684			362.797	0.508475			287.301	0.747922			2852.5	0.96861			1583.28	0.919149			783.812	0.797048											-12.5942
																	94.125	0.381036			364.109	0.508945			287.406	0.748615			2900.09	0.969507			1594.5	0.92			786.598	0.797786											-12.5951
																	94.4023	0.381389			364.438	0.509416			288.297	0.749307			2967.7	0.970404			1619.69	0.920851			788.812	0.798524											-12.6024
																	95.0938	0.381741			365.801	0.509887			289.188	0.75			3024.2	0.9713			1662.2	0.921702			788.812	0.799262											-12.6029
																	95.1992	0.382094			365.812	0.510358			289.203	0.750693			3178	0.972197			1662.5	0.922553			790	0.8											-12.6056
																	95.2188	0.382446			366.188	0.510829			290.406	0.751385			3229.6	0.973094			1678.5	0.923404			790.375	0.800738											-12.6059
																	95.4062	0.382799			367.5	0.511299			291.203	0.752078			3232.2	0.973991			1680.3	0.924255			796.188	0.801476											-12.6088
																	95.5	0.383151			369.406	0.51177			292	0.75277			3232.8	0.974888			1683.6	0.925106			797.188	0.802214											-12.6105
																	95.5	0.383504			369.594	0.512241			292.402	0.753463			3331	0.975785			1690.9	0.925957			797.906	0.802952											-12.6123
																	95.6992	0.383856			371.406	0.512712			293.594	0.754155			3409.4	0.976682			1692.4	0.926809			800.781	0.80369											-12.6195
																	95.7031	0.384209			371.906	0.513183			293.902	0.754848			3447.41	0.977578			1695.5	0.92766			801.781	0.804428											-12.6227
																	95.8008	0.384561			372.102	0.513653			295.703	0.75554			3557.5	0.978475			1700.59	0.928511			802	0.805166											-12.6233
																	95.8984	0.384914			372.203	0.514124			296.297	0.756233			3590.41	0.979372			1711.81	0.929362			804.598	0.805904											-12.624
																	96	0.385266			373	0.514595			296.391	0.756925			4306.5	0.980269			1714.1	0.930213			806.906	0.806642											-12.6247
																	96.1016	0.385619			373.625	0.515066			296.398	0.757618			4484	0.981166			1729.41	0.931064			812	0.80738											-12.6406
																	96.1992	0.385971			374.703	0.515537			296.898	0.75831			4637.8	0.982063			1732.1	0.931915			813.594	0.808118											-12.6513
																	96.1992	0.386324			374.797	0.516008			297.391	0.759003			4669.91	0.98296			1740.5	0.932766			814.5	0.808856											-12.6526
																	96.2188	0.386676			376.094	0.516478			297.703	0.759695			4696.2	0.983857			1755.69	0.933617			815.594	0.809594											-12.659
																	96.4004	0.387029			376.219	0.516949			298.1	0.760388			4699.91	0.984753			1765.3	0.934468			820.406	0.810332											-12.6651
																	96.4062	0.387381			379.109	0.51742			298.5	0.76108			4749.9	0.98565			1766	0.935319			821.188	0.81107											-12.6652
																	96.5	0.387734			381.688	0.517891			298.898	0.761773			4787.2	0.986547			1767.3	0.93617			822.812	0.811808											-12.6685
																	96.6016	0.388086			382.406	0.518362			299	0.762465			4814.11	0.987444			1777.2	0.937021			823.625	0.812546											-12.6695
																	96.6992	0.388438			382.688	0.518832			300	0.763158			4841.28	1			1783.22	0.937872			827.6	0.813284											-12.6752
																	97.125	0.388791			382.797	0.519303			301.203	0.76385							1790.5	0.938723			830.594	0.814022											-12.6779
																	97.2012	0.389143			382.812	0.519774			301.5	0.764543							1802.7	0.939574			836.812	0.81476											-12.6802
																	97.2969	0.389496			383.594	0.520245			302.219	0.765235							1814.9	0.940426			838.625	0.815498											-12.6831
																	97.4062	0.389848			383.688	0.520716			303.594	0.765928							1817.6	0.941277			844.406	0.816236											-12.6879
																	97.5	0.390201			384	0.521186			304.297	0.76662							1839.6	0.942128			847.406	0.816974											-12.7039
																	97.5	0.390553			384.203	0.521657			305.5	0.767313							1849.09	0.942979			850.375	0.817712											-12.707
																	97.6001	0.390906			384.5	0.522128			305.695	0.768006							1866.8	0.94383			851.301	0.81845											-12.7197
																	98	0.391258			385.301	0.522599			305.797	0.768698							1876	0.944681			853.188	0.819188											-12.7334
																	98	0.391611			385.703	0.52307			306.398	0.769391							1876.5	0.945532			855.188	0.819926											-12.7374
																	98.0625	0.391963			385.898	0.52354			307.703	0.770083							1881.62	0.946383			869.201	0.820664											-12.7413
																	98.0938	0.392316			386.5	0.524011			309	0.770776							1920.09	0.947234			870	0.821402											-12.7417
																	98.1953	0.392668			386.906	0.524482			309.199	0.771468							1931.8	0.948085			871.188	0.82214											-12.7443
																	98.2969	0.393021			387.125	0.524953			309.703	0.772161							1948	0.948936			877	0.822878											-12.7498
																	98.3125	0.393373			387.797	0.525424			310.102	0.772853							1959.3	0.949787			877.594	0.823616											-12.7514
																	98.375	0.393726			388.703	0.525895			310.906	0.773546							1967	0.950638			883.799	0.824354											-12.7562
																	98.5	0.394078			390.297	0.526365			311	0.774238							1968.91	0.951489			884.406	0.825092											-12.7689
																	98.7969	0.394431			392.102	0.526836			311.109	0.774931							1989.7	0.95234			886.406	0.82583											-12.7716
																	98.8125	0.394783			392.801	0.527307			311.188	0.775623							2000.09	0.953191			887.104	0.826568											-12.7838
																	99.0996	0.395136			394.203	0.527778			313.602	0.776316							2006.6	0.954043			887.781	0.827306											-12.8106
																	99.1001	0.395488			395	0.528249			313.898	0.777008							2008.5	0.954894			890	0.828044											-12.8149
																	99.1875	0.395841			395.297	0.528719			314.102	0.777701							2016	0.955745			890.188	0.828782											-12.8305
																	99.2031	0.396193			396	0.52919			314.391	0.778393							2023.69	0.956596			891.594	0.82952											-12.8331
																	99.2188	0.396546			396.625	0.529661			314.898	0.779086							2031.59	0.957447			893.402	0.830258											-12.8397
																	99.5	0.396898			397.102	0.530132			315.188	0.779778							2154.09	0.958298			894.299	0.830996											-12.8408
																	99.5938	0.397251			399.25	0.530603			315.312	0.780471							2155.6	0.959149			896	0.831734											-12.8482
																	99.6875	0.397603			399.875	0.531073			316.602	0.781163							2233.81	0.96			896.102	0.832472											-12.8498
																	99.7812	0.397956			400	0.531544			317.297	0.781856							2245.12	0.960851			897	0.83321											-12.853
																	99.7969	0.398308			400.699	0.532015			317.602	0.782548							2247.8	0.961702			909.406	0.833948											-12.8636
																	99.7988	0.398661			402.594	0.532486			317.797	0.783241							2249.7	0.962553			909.902	0.834686											-12.8636
																	99.875	0.399013			403.305	0.532957			318.281	0.783934							2265.6	0.963404			912.305	0.835424											-12.8692
																	99.9062	0.399366			403.797	0.533427			319.5	0.784626							2268.6	0.964255			912.602	0.836162											-12.8706
																	99.9375	0.399718			404.5	0.533898			319.891	0.785319							2270.6	0.965106			917.703	0.8369											-12.8836
																	100	0.40007			404.703	0.534369			320.594	0.786011							2304	0.965957			928.594	0.837638											-12.8843
																	100.125	0.400423			404.797	0.53484			320.703	0.786704							2305	0.966809			933.896	0.838376											-12.885
																	100.188	0.400775			405.297	0.535311			322.195	0.787396							2344.7	0.96766			933.906	0.839114											-12.8868
																	100.195	0.401128			405.5	0.535782			322.5	0.788089							2358.7	0.968511			937.5	0.839852											-12.8879
																	100.5	0.40148			407.094	0.536252			323.297	0.788781							2377.4	0.969362			939.594	0.84059											-12.8891
																	100.594	0.401833			408	0.536723			323.602	0.789474							2382.28	0.970213			939.594	0.841328											-12.8902
																	100.688	0.402185			408.5	0.537194			325.406	0.790166							2418.4	0.971064			954.297	0.842066											-12.9211
																	100.906	0.402538			408.906	0.537665			326	0.790859							2446.2	0.971915			955.188	0.842804											-12.9242
																	100.906	0.40289			410.312	0.538136			326.203	0.791551							2458.4	0.972766			955.199	0.843542											-12.9293
																	100.906	0.403243			410.594	0.538606			326.801	0.792244							2528.59	0.973617			962	0.84428											-12.9343
																	101.312	0.403595			413	0.539077			326.812	0.792936							2557.9	0.974468			970.906	0.845018											-12.9526
																	101.398	0.403948			413.398	0.539548			327.812	0.793629							2577.2	0.975319			971.219	0.845756											-12.9659
																	101.797	0.4043			413.805	0.540019			329.406	0.794321							2588	0.97617			971.299	0.846494											-12.9796
																	101.801	0.404653			413.875	0.54049			330.195	0.795014							2625.8	0.977021			984.598	0.847232											-12.9815
																	102	0.405005			414.906	0.54096			330.398	0.795706							2634.5	0.977872			986.812	0.84797											-12.9884
																	102	0.405358			417.203	0.541431			331.906	0.796399							2667.1	0.978723			986.812	0.848708											-13.0059
																	102.102	0.40571			417.297	0.541902			332.188	0.797091							2677.1	0.979574			988.375	0.849446											-13.0062
																	102.102	0.406063			417.695	0.542373			333.297	0.797784							2686.7	0.980426			991.797	0.850185											-13.008
																	102.125	0.406415			419.805	0.542844			333.906	0.798476							2766.89	0.981277			992.406	0.850923											-13.0142
																	102.219	0.406768			420.5	0.543315			334.594	0.799169							2827.7	0.982128			992.812	0.851661											-13.0423
																	102.301	0.40712			421.25	0.543785			335.102	0.799861							2836.11	0.982979			996.812	0.852399											-13.0426
																	102.402	0.407473			421.398	0.544256			335.406	0.800554							2841.9	0.98383			998.188	0.853137											-13.0558
																	103	0.407825			423.102	0.544727			336	0.801247							2850.2	0.984681			1000.59	0.853875											-13.0595
																	103.4	0.408178			423.812	0.545198			336.5	0.801939							2857.22	0.985532			1001.22	0.854613											-13.0645
																	103.5	0.40853			424.102	0.545669			337.609	0.802632							2914.3	0.986383			1002	0.855351											-13.0676
																	103.5	0.408883			424.703	0.546139			339.398	0.803324							3004.3	0.987234			1005.62	0.856089											-13.0714
																	103.594	0.409235			426.5	0.54661			339.797	0.804017							3029.4	0.988085			1006.41	0.856827											-13.0722
																	103.695	0.409588			426.5	0.547081			341.398	0.804709							3140.81	0.988936			1006.59	0.857565											-13.0793
																	104	0.40994			427.812	0.547552			344.398	0.805402							3209.5	0.989787			1007	0.858303											-13.0817
																	104.5	0.410293			428.102	0.548023			344.672	0.806094							3236	0.990638			1012.19	0.859041											-13.0868
																	104.797	0.410645			428.109	0.548493			346.172	0.806787							3424.41	0.991489			1013.22	0.859779											-13.0909
																	104.812	0.410998			428.297	0.548964			346.195	0.807479							3560	0.99234			1014.81	0.860517											-13.1105
																	104.906	0.41135			428.375	0.549435			346.195	0.808172							3645.19	0.993191			1016.22	0.861255											-13.1158
																	105.094	0.411703			429.703	0.549906			346.219	0.808864							4097.8	0.994043			1016.41	0.861993											-13.1239
																	105.398	0.412055			430.203	0.550377			347	0.809557							4214.28	0.994894			1020.59	0.862731											-13.1253
																	105.4	0.412407			430.602	0.550847			353.188	0.810249							4417.1	0.995745			1022	0.863469											-13.1278
																	105.5	0.41276			430.797	0.551318			353.391	0.810942							4667.59	0.996596			1031	0.864207											-13.1337
																	105.5	0.413112			432.699	0.551789			354.898	0.811634							4782.09	1			1032.38	0.864945											-13.1497
																	105.6	0.413465			433.406	0.55226			355.391	0.812327											1033.5	0.865683											-13.1516
																	105.602	0.413817			433.594	0.552731			355.594	0.813019											1034.81	0.866421											-13.1526
																	105.688	0.41417			435.438	0.553202			355.594	0.813712											1041	0.867159											-13.1623
																	105.699	0.414522			435.5	0.553672			356.375	0.814404											1042.19	0.867897											-13.1669
																	105.703	0.414875			436.906	0.554143			357	0.815097											1043.41	0.868635											-13.167
																	105.812	0.415227			437.125	0.554614			360.391	0.815789											1045.19	0.869373											-13.1849
																	106	0.41558			437.398	0.555085			361.203	0.816482											1048.81	0.870111											-13.196
																	106.102	0.415932			437.406	0.555556			361.594	0.817175											1051	0.870849											-13.2034
																	106.188	0.416285			437.688	0.556026			361.797	0.817867											1051.19	0.871587											-13.2036
																	106.602	0.416637			437.891	0.556497			362.102	0.81856											1056	0.872325											-13.2036
																	106.797	0.41699			438.094	0.556968			363.195	0.819252											1058	0.873063											-13.2069
																	106.898	0.417342			440.898	0.557439			366	0.819945											1059.81	0.873801											-13.2157
																	107	0.417695			442.992	0.55791			366.102	0.820637											1060.41	0.874539											-13.2244
																	107.102	0.418047			443.801	0.55838			366.406	0.82133											1064.22	0.875277											-13.2282
																	107.195	0.4184			443.812	0.558851			366.898	0.822022											1077.59	0.876015											-13.2357
																	107.5	0.418752			443.812	0.559322			367.703	0.822715											1084.38	0.876753											-13.2437
																	107.5	0.419105			444.305	0.559793			367.898	0.823407											1093.41	0.877491											-13.2443
																	107.598	0.419457			444.406	0.560264			368.094	0.8241											1096.81	0.878229											-13.2523
																	107.602	0.41981			445.195	0.560734			370.695	0.824792											1097.25	0.878967											-13.2625
																	107.602	0.420162			445.297	0.561205			374.891	0.825485											1098.81	0.879705											-13.2645
																	107.699	0.420515			445.398	0.561676			375.305	0.826177											1102	0.880443											-13.268
																	107.7	0.420867			445.906	0.562147			375.602	0.82687											1106.19	0.881181											-13.2713
																	107.781	0.42122			446.602	0.562618			375.703	0.827562											1112.62	0.881919											-13.2764
																	107.906	0.421572			446.699	0.563089			375.703	0.828255											1117.38	0.882657											-13.2822
																	108	0.421925			447.102	0.563559			375.703	0.828947											1118.81	0.883395											-13.2824
																	108.062	0.422277			447.891	0.56403			376.797	0.82964											1121.1	0.884133											-13.2832
																	108.094	0.42263			449.203	0.564501			377	0.830332											1121.19	0.884871											-13.2838
																	108.305	0.422982			449.898	0.564972			377.797	0.831025											1135.78	0.885609											-13.2887
																	108.703	0.423335			450.199	0.565443			380	0.831717											1136.38	0.886347											-13.2895
																	108.812	0.423687			451	0.565913			380.297	0.83241											1140.41	0.887085											-13.2939
																	108.898	0.424039			451.5	0.566384			383.312	0.833102											1142	0.887823											-13.2999
																	109	0.424392			452	0.566855			384.703	0.833795											1149	0.888561											-13.3025
																	109.101	0.424744			452	0.567326			386.5	0.834488											1149.9	0.889299											-13.3083
																	109.297	0.425097			452.398	0.567797			387.703	0.83518											1156.19	0.890037											-13.3083
																	109.312	0.425449			455.375	0.568267			388.094	0.835873											1159.19	0.890775											-13.313
																	109.398	0.425802			456.094	0.568738			389.109	0.836565											1163	0.891513											-13.3204
																	109.5	0.426154			456.891	0.569209			389.297	0.837258											1163.4	0.892251											-13.3218
																	109.562	0.426507			457.297	0.56968			389.438	0.83795											1163.41	0.892989											-13.3403
																	109.701	0.426859			458.094	0.570151			391.609	0.838643											1171	0.893727											-13.3495
																	110.094	0.427212			458.688	0.570621			392.602	0.839335											1183.9	0.894465											-13.3687
																	110.125	0.427564			459.703	0.571092			393.594	0.840028											1184.19	0.895203											-13.378
																	110.188	0.427917			460.6	0.571563			395.406	0.84072											1186.19	0.895941											-13.3781
																	110.305	0.428269			461.094	0.572034			396.109	0.841413											1189.19	0.896679											-13.3809
																	111	0.428622			461.719	0.572505			396.109	0.842105											1200.78	0.897417											-13.3828
																	111	0.428974			462.5	0.572976			397.406	0.842798											1214.75	0.898155											-13.3846
																	111.109	0.429327			462.688	0.573446			398.805	0.84349											1218.59	0.898893											-13.3896
																	111.301	0.429679			462.801	0.573917			400	0.844183											1221.81	0.899631											-13.3924
																	111.406	0.430032			463	0.574388			400.203	0.844875											1223.62	0.900369											-13.3958
																	111.406	0.430384			463.297	0.574859			401.219	0.845568											1226.62	0.901107											-13.3965
																	111.719	0.430737			463.5	0.57533			401.695	0.84626											1227.81	0.901845											-13.3986
																	111.781	0.431089			463.5	0.5758			402.102	0.846953											1230.4	0.902583											-13.4036
																	111.898	0.431442			464.188	0.576271			404.609	0.847645											1236.38	0.903321											-13.4109
																	112.098	0.431794			464.297	0.576742			406.781	0.848338											1240.38	0.904059											-13.4141
																	112.102	0.432147			464.812	0.577213			406.906	0.84903											1242	0.904797											-13.4147
																	112.406	0.432499			465.297	0.577684			410.102	0.849723											1250	0.905535											-13.4207
																	112.406	0.432852			465.805	0.578154			412.094	0.850416											1250.59	0.906273											-13.4245
																	113.398	0.433204			466.398	0.578625			414.5	0.851108											1254.7	0.907011											-13.4333
																	113.5	0.433557			466.797	0.579096			417	0.851801											1255.19	0.907749											-13.4347
																	113.5	0.433909			466.875	0.579567			417	0.852493											1259	0.908487											-13.4355
																	113.906	0.434262			467	0.580038			422.594	0.853186											1261.22	0.909225											-13.4438
																	114.5	0.434614			468	0.580508			425	0.853878											1273.19	0.909963											-13.4499
																	114.5	0.434967			471.094	0.580979			425.297	0.854571											1293.25	0.910701											-13.4574
																	114.5	0.435319			471.094	0.58145			425.391	0.855263											1299.19	0.911439											-13.4609
																	114.594	0.435671			471.102	0.581921			425.5	0.855956											1299.22	0.912177											-13.4647
																	114.602	0.436024			472.312	0.582392			426.703	0.856648											1304.19	0.912915											-13.4749
																	114.703	0.436376			472.594	0.582863			427.703	0.857341											1307.38	0.913653											-13.4797
																	114.898	0.436729			474.797	0.583333			429.812	0.858033											1314.81	0.914391											-13.4809
																	114.906	0.437081			475.594	0.583804			430.906	0.858726											1321.59	0.915129											-13.4823
																	115.094	0.437434			475.602	0.584275			432	0.859418											1324.22	0.915867											-13.4867
																	115.5	0.437786			476.703	0.584746			436	0.860111											1341.6	0.916605											-13.4877
																	115.5	0.438139			477.312	0.585217			437	0.860803											1381.22	0.917343											-13.495
																	115.5	0.438491			477.5	0.585687			437	0.861496											1398	0.918081											-13.4962
																	115.625	0.438844			478.203	0.586158			437.406	0.862188											1420.78	0.918819											-13.4974
																	115.688	0.439196			478.781	0.586629			438.703	0.862881											1428.8	0.919557											-13.5012
																	115.781	0.439549			480.109	0.5871			441.695	0.863573											1436.59	0.920295											-13.5034
																	115.812	0.439901			480.203	0.587571			443.203	0.864266											1452.19	0.921033											-13.5135
																	115.898	0.440254			480.297	0.588041			444.625	0.864958											1463.22	0.921771											-13.5296
																	115.906	0.440606			480.406	0.588512			445.594	0.865651											1466.19	0.922509											-13.5299
																	116.297	0.440959			480.5	0.588983			445.906	0.866343											1494.81	0.923247											-13.5472
																	116.299	0.441311			484.297	0.589454			447.398	0.867036											1507.5	0.923985											-13.5508
																	116.305	0.441664			484.797	0.589925			447.805	0.867729											1518.38	0.924723											-13.5515
																	116.906	0.442016			485.195	0.590395			449.438	0.868421											1524.81	0.925461											-13.5585
																	117	0.442369			486.312	0.590866			450	0.869114											1531.41	0.926199											-13.563
																	117	0.442721			486.703	0.591337			452.812	0.869806											1560.7	0.926937											-13.5658
																	117	0.443074			486.797	0.591808			454.5	0.870499											1561.81	0.927675											-13.5763
																	117.195	0.443426			487.797	0.592279			457.5	0.871191											1588.4	0.928413											-13.5774
																	117.297	0.443779			488.188	0.59275			458.406	0.871884											1588.81	0.929151											-13.5798
																	117.312	0.444131			488.898	0.59322			459.602	0.872576											1592.6	0.929889											-13.5832
																	117.398	0.444484			489.102	0.593691			459.797	0.873269											1599.81	0.930627											-13.5888
																	117.398	0.444836			489.5	0.594162			459.914	0.873961											1606.19	0.931365											-13.5917
																	118.094	0.445189			490	0.594633			462.203	0.874654											1646.7	0.932103											-13.5929
																	118.098	0.445541			490.594	0.595104			462.812	0.875346											1649.19	0.932841											-13.5977
																	118.195	0.445894			491.188	0.595574			463.703	0.876039											1653.3	0.933579											-13.6031
																	118.199	0.446246			491.199	0.596045			464	0.876731											1657.59	0.934317											-13.6081
																	118.301	0.446599			491.25	0.596516			464.805	0.877424											1660.81	0.935055											-13.6159
																	118.305	0.446951			491.703	0.596987			464.906	0.878116											1667.19	0.935793											-13.6164
																	118.406	0.447303			492.625	0.597458			465.188	0.878809											1707.19	0.936531											-13.6315
																	118.602	0.447656			495.102	0.597928			465.898	0.879501											1709.41	0.937269											-13.6401
																	118.699	0.448008			495.203	0.598399			466	0.880194											1712.75	0.938007											-13.6503
																	119	0.448361			495.203	0.59887			467.5	0.880886											1715.41	0.938745											-13.6506
																	119.195	0.448713			495.312	0.599341			468.305	0.881579											1721.1	0.939483											-13.6539
																	119.305	0.449066			495.602	0.599812			468.594	0.882271											1729.8	0.940221											-13.6546
																	119.5	0.449418			495.906	0.600282			470.398	0.882964											1746.3	0.940959											-13.656
																	119.5	0.449771			496.699	0.600753			470.609	0.883657											1750.19	0.941697											-13.6655
																	119.594	0.450123			496.703	0.601224			477	0.884349											1750.81	0.942435											-13.674
																	119.898	0.450476			497.094	0.601695			480.297	0.885042											1752.41	0.943173											-13.6781
																	119.9	0.450828			498.102	0.602166			480.797	0.885734											1758.2	0.943911											-13.6851
																	120	0.451181			498.199	0.602637			481.219	0.886427											1772.41	0.944649											-13.6858
																	120.094	0.451533			499.281	0.603107			481.797	0.887119											1772.9	0.945387											-13.6932
																	120.375	0.451886			499.398	0.603578			482.102	0.887812											1785.59	0.946125											-13.6991
																	120.5	0.452238			500	0.604049			483.594	0.888504											1789.19	0.946863											-13.7054
																	120.602	0.452591			500.312	0.60452			484	0.889197											1800	0.947601											-13.7101
																	120.688	0.452943			501.102	0.604991			484.398	0.889889											1800.59	0.948339											-13.7146
																	121.102	0.453296			501.125	0.605461			486	0.890582											1800.89	0.949077											-13.7174
																	121.312	0.453648			501.898	0.605932			486.7	0.891274											1803.3	0.949815											-13.7205
																	121.5	0.454001			502.797	0.606403			489.406	0.891967											1821	0.950554											-13.7228
																	121.781	0.454353			503.297	0.606874			490.094	0.892659											1822.2	0.951292											-13.7237
																	121.781	0.454706			503.406	0.607345			492.906	0.893352											1834	0.95203											-13.7274
																	121.875	0.455058			504.094	0.607815			493.898	0.894044											1848	0.952768											-13.7449
																	122.1	0.455411			504.781	0.608286			494.195	0.894737											1870.81	0.953506											-13.7483
																	122.281	0.455763			506	0.608757			494.703	0.895429											1881	0.954244											-13.7524
																	122.594	0.456116			506.594	0.609228			497.406	0.896122											1931.22	0.954982											-13.7622
																	122.602	0.456468			507.094	0.609699			500.406	0.896814											1940.41	0.95572											-13.7646
																	122.699	0.456821			508	0.610169			501.188	0.897507											1949.22	0.956458											-13.7693
																	122.812	0.457173			508.594	0.61064			501.594	0.898199											1949.59	0.957196											-13.7702
																	122.898	0.457526			509.703	0.611111			502.602	0.898892											1952.81	0.957934											-13.775
																	123.102	0.457878			510.805	0.611582			507.297	0.899584											1955.62	0.958672											-13.786
																	123.219	0.458231			511.203	0.612053			514.898	0.900277											1998.44	0.95941											-13.7949
																	123.312	0.458583			512.188	0.612524			518.5	0.90097											2056.81	0.960148											-13.8028
																	123.402	0.458935			512.5	0.612994			521.203	0.901662											2067.62	0.960886											-13.8046
																	123.594	0.459288			512.898	0.613465			522.594	0.902355											2070	0.961624											-13.8051
																	123.594	0.45964			513.203	0.613936			522.703	0.903047											2082.44	0.962362											-13.8067
																	124.1	0.459993			513.398	0.614407			526.406	0.90374											2130.19	0.9631											-13.8178
																	124.406	0.460345			519.203	0.614878			527.297	0.904432											2131.19	0.963838											-13.8253
																	124.5	0.460698			519.305	0.615348			527.906	0.905125											2136.41	0.964576											-13.8275
																	124.5	0.46105			520.199	0.615819			528.625	0.905817											2152.41	0.965314											-13.8277
																	124.6	0.461403			520.5	0.61629			530.406	0.90651											2196.81	0.966052											-13.8303
																	124.699	0.461755			520.594	0.616761			531.203	0.907202											2218	0.96679											-13.8456
																	124.799	0.462108			521.297	0.617232			532.195	0.907895											2260.44	0.967528											-13.8466
																	124.812	0.46246			521.938	0.617702			532.5	0.908587											2340.41	0.968266											-13.8489
																	125.898	0.462813			522.406	0.618173			535.906	0.90928											2360.81	0.969004											-13.8639
																	125.906	0.463165			523	0.618644			537	0.909972											2386.59	0.969742											-13.8716
																	126	0.463518			523.812	0.619115			537.812	0.910665											2405.62	0.97048											-13.8776
																	126	0.46387			524.102	0.619586			540.609	0.911357											2440.5	0.971218											-13.8785
																	126	0.464223			524.5	0.620056			542	0.91205											2458.6	0.971956											-13.8839
																	126	0.464575			524.594	0.620527			543.586	0.912742											2463.62	0.972694											-13.8861
																	126.4	0.464928			524.906	0.620998			545.188	0.913435											2492.71	0.973432											-13.8927
																	126.5	0.46528			526.5	0.621469			546.781	0.914127											2493.62	0.97417											-13.8949
																	126.797	0.465633			527	0.62194			547.875	0.91482											2500.75	0.974908											-13.9087
																	127	0.465985			528.688	0.622411			550	0.915512											2522.38	0.975646											-13.915
																	127.094	0.466338			529.203	0.622881			552.203	0.916205											2624	0.976384											-13.918
																	127.102	0.46669			529.5	0.623352			553.805	0.916898											2722	0.977122											-13.9195
																	127.398	0.467043			529.6	0.623823			557	0.91759											2738.78	0.97786											-13.9227
																	127.4	0.467395			530.406	0.624294			559.398	0.918283											2766.78	0.978598											-13.9273
																	127.5	0.467748			531.5	0.624765			560.203	0.918975											2786.7	0.979336											-13.9323
																	127.699	0.4681			531.5	0.625235			563.594	0.919668											2895.19	0.980074											-13.934
																	127.801	0.468453			531.594	0.625706			563.797	0.92036											2912.39	0.980812											-13.9345
																	127.9	0.468805			532.203	0.626177			565.805	0.921053											2979.6	0.98155											-13.9377
																	128.301	0.469158			532.438	0.626648			566.203	0.921745											2984.38	0.982288											-13.9377
																	128.699	0.46951			532.5	0.627119			566.797	0.922438											3069.89	0.983026											-13.94
																	128.898	0.469863			533.797	0.627589			567	0.92313											3153.9	0.983764											-13.9531
																	129.109	0.470215			534.297	0.62806			567.898	0.923823											3206.9	0.984502											-13.954
																	129.801	0.470568			534.5	0.628531			575.695	0.924515											3215.4	0.98524											-13.961
																	130.812	0.47092			535.5	0.629002			586.602	0.925208											3225.22	0.985978											-13.9646
																	130.898	0.471272			539	0.629473			587.188	0.9259											3296.4	0.986716											-13.9714
																	131.297	0.471625			541.391	0.629944			591.406	0.926593											3478	0.987454											-13.9716
																	131.301	0.471977			541.906	0.630414			592.406	0.927285											3519.6	0.988192											-13.9762
																	131.5	0.47233			544.301	0.630885			598.398	0.927978											3719.3	0.98893											-13.9795
																	132.098	0.472682			544.398	0.631356			599.703	0.92867											3812.78	0.989668											-13.9836
																	132.102	0.473035			544.5	0.631827			600.797	0.929363											3900.81	0.990406											-13.9901
																	132.125	0.473387			545.5	0.632298			601.219	0.930055											3939.2	0.991144											-13.9912
																	132.188	0.47374			546	0.632768			603.797	0.930748											4046.41	0.991882											-13.9933
																	132.402	0.474092			546.406	0.633239			605.301	0.93144											4318.41	1											-13.9991
																	132.5	0.474445			547.391	0.63371			605.609	0.932133																							-13.9993
																	132.898	0.474797			548.312	0.634181			609.609	0.932825																							-14.0196
																	133.1	0.47515			550	0.634652			611.703	0.933518																							-14.0214
																	134.4	0.475502			551.391	0.635122			615.102	0.934211																							-14.0261
																	135.219	0.475855			551.938	0.635593			617.203	0.934903																							-14.036
																	135.406	0.476207			552.562	0.636064			617.375	0.935596																							-14.0374
																	135.602	0.47656			552.594	0.636535			621	0.936288																							-14.0537
																	135.688	0.476912			555	0.637006			623.188	0.936981																							-14.0566
																	135.906	0.477265			555.602	0.637476			628.602	0.937673																							-14.058
																	136	0.477617			556	0.637947			631.797	0.938366																							-14.058
																	136.094	0.47797			556.695	0.638418			632.719	0.939058																							-14.0585
																	136.281	0.478322			558	0.638889			635.305	0.939751																							-14.0597
																	136.398	0.478675			558.094	0.63936			635.406	0.940443																							-14.0642
																	136.703	0.479027			559.125	0.639831			638.094	0.941136																							-14.0674
																	137	0.47938			559.719	0.640301			638.594	0.941828																							-14.0682
																	137.5	0.479732			560.094	0.640772			649.5	0.942521																							-14.0699
																	137.625	0.480085			560.688	0.641243			652.797	0.943213																							-14.086
																	137.801	0.480437			562.906	0.641714			653.391	0.943906																							-14.0957
																	138.1	0.48079			563	0.642185			653.406	0.944598																							-14.0959
																	138.5	0.481142			563.102	0.642655			653.602	0.945291																							-14.1096
																	138.801	0.481495			563.906	0.643126			655.781	0.945983																							-14.1168
																	139.312	0.481847			567.098	0.643597			657.203	0.946676																							-14.1204
																	139.398	0.4822			567.297	0.644068			660.125	0.947368																							-14.1305
																	139.598	0.482552			567.562	0.644539			675.695	0.948061																							-14.132
																	139.703	0.482904			570	0.645009			675.797	0.948753																							-14.1323
																	139.801	0.483257			570.125	0.64548			679.188	0.949446																							-14.134
																	139.801	0.483609			570.195	0.645951			696.406	0.950139																							-14.1347
																	140	0.483962			571.797	0.646422			697.375	0.950831																							-14.1441
																	140.594	0.484314			572.094	0.646893			698.906	0.951524																							-14.1612
																	140.797	0.484667			572.297	0.647363			705.602	0.952216																							-14.1657
																	140.799	0.485019			573.094	0.647834			718.102	0.952909																							-14.1691
																	141.219	0.485372			573.562	0.648305			719.805	0.953601																							-14.1724
																	141.4	0.485724			574.195	0.648776			721.594	0.954294																							-14.1732
																	141.5	0.486077			574.312	0.649247			724	0.954986																							-14.1732
																	141.805	0.486429			574.875	0.649718			727.398	0.955679																							-14.1753
																	142.199	0.486782			575.188	0.650188			730.203	0.956371																							-14.1784
																	142.312	0.487134			576.703	0.650659			744.398	0.957064																							-14.1789
																	142.375	0.487487			579.062	0.65113			746	0.957756																							-14.1869
																	142.402	0.487839			579.312	0.651601			755.195	0.958449																							-14.1937
																	142.5	0.488192			579.906	0.652072			761.906	0.959141																							-14.1959
																	142.701	0.488544			580.203	0.652542			766.797	0.959834																							-14.1968
																	142.797	0.488897			581.602	0.653013			769.195	0.960526																							-14.2023
																	143	0.489249			583.5	0.653484			770.703	0.961219																							-14.2041
																	143	0.489602			584.102	0.653955			773.906	0.961911																							-14.2045
																	143.5	0.489954			585.094	0.654426			774.797	0.962604																							-14.21
																	143.797	0.490307			585.5	0.654896			777.102	0.963296																							-14.211
																	143.797	0.490659			585.688	0.655367			784.297	0.963989																							-14.2138
																	144.188	0.491012			585.898	0.655838			787.094	0.964681																							-14.22
																	144.406	0.491364			586.906	0.656309			787.188	0.965374																							-14.2248
																	144.5	0.491717			590.797	0.65678			790.188	0.966066																							-14.2262
																	144.6	0.492069			590.812	0.65725			791	0.966759																							-14.2284
																	144.812	0.492422			592.102	0.657721			805	0.967452																							-14.2426
																	145.598	0.492774			595.703	0.658192			808.805	0.968144																							-14.2476
																	146	0.493127			597.297	0.658663			815	0.968837																							-14.2629
																	147.094	0.493479			597.406	0.659134			820.812	0.969529																							-14.2725
																	147.5	0.493832			600	0.659605			823.797	0.970222																							-14.273
																	147.5	0.494184			600.5	0.660075			830.406	0.970914																							-14.2756
																	147.703	0.494536			601.75	0.660546			858.594	0.971607																							-14.2766
																	147.906	0.494889			603.109	0.661017			861.797	0.972299																							-14.2775
																	148	0.495241			606.203	0.661488			872.602	0.972992																							-14.2812
																	148.195	0.495594			606.398	0.661959			875.203	0.973684																							-14.2814
																	148.406	0.495946			606.801	0.662429			891.406	0.974377																							-14.2836
																	148.5	0.496299			607	0.6629			898.406	0.975069																							-14.2928
																	148.6	0.496651			607.203	0.663371			903.398	0.975762																							-14.293
																	148.625	0.497004			607.203	0.663842			908.891	0.976454																							-14.2947
																	148.75	0.497356			609.1	0.664313			923	0.977147																							-14.2962
																	148.801	0.497709			610.5	0.664783			927.688	0.977839																							-14.2978
																	149	0.498061			612.188	0.665254			992.219	0.978532																							-14.2986
																	149.312	0.498414			613.102	0.665725			1002.59	0.979224																							-14.3316
																	149.7	0.498766			617.301	0.666196			1003.3	0.979917																							-14.3477
																	149.906	0.499119			617.602	0.666667			1032.11	0.980609																							-14.3588
																	149.906	0.499471			617.797	0.667137			1034.8	0.981302																							-14.3657
																	150	0.499824			618.5	0.667608			1038.56	0.981994																							-14.3702
																	150.402	0.500176			619.812	0.668079			1051.5	0.982687																							-14.3749
																	150.906	0.500529			619.898	0.66855			1056	0.98338																							-14.3774
																	151.102	0.500881			621.906	0.669021			1080.41	0.984072																							-14.3789
																	151.203	0.501234			622.5	0.669492			1089.7	0.984765																							-14.3907
																	151.301	0.501586			623.598	0.669962			1094.7	0.985457																							-14.4132
																	151.406	0.501939			623.812	0.670433			1100.19	0.98615																							-14.4255
																	151.5	0.502291			623.891	0.670904			1146	0.986842																							-14.4307
																	151.602	0.502644			624.598	0.671375			1152.31	0.987535																							-14.4346
																	151.797	0.502996			625.203	0.671846			1163.39	0.988227																							-14.4444
																	152.1	0.503349			625.406	0.672316			1168.91	0.98892																							-14.4554
																	152.188	0.503701			625.703	0.672787			1186.2	0.989612																							-14.4575
																	152.594	0.504054			626.301	0.673258			1209.7	0.990305																							-14.4611
																	152.594	0.504406			627.297	0.673729			1231.22	0.990997																							-14.4662
																	152.695	0.504759			629.797	0.6742			1247	0.99169																							-14.4721
																	153.098	0.505111			630.812	0.67467			1261.41	0.992382																							-14.492
																	153.219	0.505464			631.203	0.675141			1266.8	0.993075																							-14.4975
																	153.281	0.505816			632.305	0.675612			1273.6	0.993767																							-14.5054
																	153.5	0.506168			632.699	0.676083			1336.41	0.99446																							-14.5167
																	153.5	0.506521			633.398	0.676554			1551.2	0.995152																							-14.5175
																	154.094	0.506873			634	0.677024			1600.5	0.995845																							-14.5234
																	154.625	0.507226			635.301	0.677495			1632.41	0.996537																							-14.5265
																	154.898	0.507578			636.781	0.677966			1648.59	0.99723																							-14.5479
																	154.899	0.507931			637.402	0.678437			1712.8	0.997922																							-14.5816
																	154.902	0.508283			638	0.678908			1714.41	0.998615																							-14.6
																	154.906	0.508636			638.594	0.679379			1732	0.999307																							-14.6112
																	155.301	0.508988			639.797	0.679849			1765.11	1																							-14.6276
																	155.305	0.509341			639.801	0.68032																											-14.6303
																	155.699	0.509693			640.203	0.680791																											-14.6357
																	155.703	0.510046			640.391	0.681262																											-14.6534
																	156.094	0.510398			642	0.681733																											-14.6641
																	156.102	0.510751			642.398	0.682203																											-14.6739
																	156.398	0.511103			644.094	0.682674																											-14.674
																	156.438	0.511456			645.188	0.683145																											-14.6752
																	156.703	0.511808			645.301	0.683616																											-14.6769
																	156.906	0.512161			645.406	0.684087																											-14.6809
																	157.594	0.512513			647.406	0.684557																											-14.6811
																	158	0.512866			647.797	0.685028																											-14.6882
																	158.102	0.513218			648.203	0.685499																											-14.6939
																	158.4	0.513571			649.203	0.68597																											-14.699
																	158.8	0.513923			650	0.686441																											-14.7022
																	159	0.514276			650.219	0.686911																											-14.7053
																	159	0.514628			650.812	0.687382																											-14.7084
																	159.219	0.514981			651.281	0.687853																											-14.7131
																	159.4	0.515333			653.719	0.688324																											-14.7157
																	159.438	0.515686			655	0.688795																											-14.7171
																	159.5	0.516038			655.102	0.689266																											-14.7173
																	159.594	0.516391			656.5	0.689736																											-14.724
																	159.625	0.516743			656.703	0.690207																											-14.7377
																	159.805	0.517096			657.906	0.690678																											-14.7406
																	160	0.517448			662.062	0.691149																											-14.7545
																	160.219	0.5178			662.688	0.69162																											-14.7572
																	160.297	0.518153			666	0.69209																											-14.7575
																	160.391	0.518505			666.797	0.692561																											-14.767
																	160.699	0.518858			668.801	0.693032																											-14.7762
																	161	0.51921			670.906	0.693503																											-14.7782
																	161	0.519563			670.906	0.693974																											-14.7794
																	161.203	0.519915			671.102	0.694444																											-14.7928
																	161.203	0.520268			671.102	0.694915																											-14.7943
																	161.301	0.52062			672.703	0.695386																											-14.7984
																	161.688	0.520973			673.812	0.695857																											-14.7998
																	161.701	0.521325			675.906	0.696328																											-14.801
																	161.812	0.521678			676.875	0.696798																											-14.801
																	162.281	0.52203			677.812	0.697269																											-14.8013
																	162.812	0.522383			678.5	0.69774																											-14.8151
																	162.812	0.522735			678.5	0.698211																											-14.8266
																	163.125	0.523088			678.594	0.698682																											-14.8421
																	163.602	0.52344			679.375	0.699153																											-14.8449
																	163.719	0.523793			679.5	0.699623																											-14.8478
																	163.906	0.524145			680.188	0.700094																											-14.8537
																	164	0.524498			680.719	0.700565																											-14.8627
																	164.102	0.52485			681.297	0.701036																											-14.8769
																	164.299	0.525203			682	0.701507																											-14.8815
																	164.594	0.525555			683.801	0.701977																											-14.8912
																	164.898	0.525908			683.812	0.702448																											-14.9001
																	165.312	0.52626			685	0.702919																											-14.9029
																	165.906	0.526613			687.602	0.70339																											-14.9056
																	166.2	0.526965			687.699	0.703861																											-14.9065
																	166.203	0.527318			689.398	0.704331																											-14.9148
																	166.219	0.52767			689.398	0.704802																											-14.919
																	166.5	0.528023			692.375	0.705273																											-14.9219
																	167	0.528375			692.898	0.705744																											-14.9287
																	167.094	0.528728			692.906	0.706215																											-14.9526
																	167.301	0.52908			693.406	0.706685																											-14.9532
																	167.301	0.529432			693.805	0.707156																											-14.9536
																	167.312	0.529785			695.609	0.707627																											-14.9592
																	167.375	0.530137			697.25	0.708098																											-14.971
																	167.406	0.53049			697.402	0.708569																											-14.9738
																	167.812	0.530842			699.297	0.70904																											-14.9773
																	168.312	0.531195			700.797	0.70951																											-14.9831
																	168.375	0.531547			701	0.709981																											-14.9885
																	168.5	0.5319			703.594	0.710452																											-14.9897
																	168.9	0.532252			703.598	0.710923																											-15.0018
																	169	0.532605			704.594	0.711394																											-15.0101
																	169	0.532957			705.594	0.711864																											-15.0219
																	169	0.53331			706.398	0.712335																											-15.0257
																	169.195	0.533662			707.125	0.712806																											-15.0269
																	169.375	0.534015			708.438	0.713277																											-15.0278
																	169.5	0.534367			709.609	0.713748																											-15.0312
																	169.695	0.53472			711.188	0.714218																											-15.057
																	169.7	0.535072			713.594	0.714689																											-15.0573
																	170.301	0.535425			713.609	0.71516																											-15.058
																	170.703	0.535777			715.602	0.715631																											-15.0742
																	171	0.53613			716.094	0.716102																											-15.087
																	171	0.536482			716.102	0.716573																											-15.0928
																	171.094	0.536835			716.125	0.717043																											-15.0941
																	171.688	0.537187			716.5	0.717514																											-15.0943
																	171.812	0.53754			718.199	0.717985																											-15.0944
																	172.1	0.537892			720.203	0.718456																											-15.1005
																	172.203	0.538245			720.602	0.718927																											-15.1017
																	172.5	0.538597			722.5	0.719397																											-15.1062
																	172.688	0.53895			727.312	0.719868																											-15.1117
																	172.703	0.539302			729.102	0.720339																											-15.117
																	172.898	0.539655			729.125	0.72081																											-15.1218
																	173.301	0.540007			729.188	0.721281																											-15.1256
																	173.797	0.54036			732.398	0.721751																											-15.1355
																	174.094	0.540712			734.398	0.722222																											-15.14
																	174.125	0.541065			734.406	0.722693																											-15.1405
																	174.402	0.541417			735.797	0.723164																											-15.1488
																	174.598	0.541769			736	0.723635																											-15.1497
																	174.797	0.542122			736.102	0.724105																											-15.1675
																	174.801	0.542474			736.781	0.724576																											-15.1772
																	175.688	0.542827			737.094	0.725047																											-15.1824
																	176.188	0.543179			737.188	0.725518																											-15.1841
																	176.3	0.543532			737.438	0.725989																											-15.1904
																	176.805	0.543884			737.594	0.72646																											-15.1951
																	177.406	0.544237			738.305	0.72693																											-15.1978
																	177.5	0.544589			739	0.727401																											-15.1996
																	177.688	0.544942			739.5	0.727872																											-15.2006
																	178.1	0.545294			744.594	0.728343																											-15.2031
																	178.4	0.545647			744.719	0.728814																											-15.2041
																	178.406	0.545999			745.406	0.729284																											-15.2063
																	179.5	0.546352			748.402	0.729755																											-15.2077
																	179.594	0.546704			751.398	0.730226																											-15.2119
																	179.699	0.547057			752.094	0.730697																											-15.2154
																	180.5	0.547409			753.5	0.731168																											-15.229
																	180.801	0.547762			753.5	0.731638																											-15.2308
																	181.102	0.548114			754.703	0.732109																											-15.2332
																	181.188	0.548467			754.812	0.73258																											-15.2348
																	181.5	0.548819			755.391	0.733051																											-15.2401
																	181.602	0.549172			755.602	0.733522																											-15.2486
																	181.688	0.549524			760.5	0.733992																											-15.2556
																	181.797	0.549877			761.297	0.734463																											-15.2597
																	181.898	0.550229			761.5	0.734934																											-15.2661
																	183.195	0.550582			762.5	0.735405																											-15.2679
																	183.406	0.550934			763.5	0.735876																											-15.2746
																	183.438	0.551287			765	0.736347																											-15.277
																	183.602	0.551639			765.801	0.736817																											-15.2831
																	184	0.551992			769	0.737288																											-15.2872
																	184.102	0.552344			769.801	0.737759																											-15.2915
																	184.188	0.552697			770.906	0.73823																											-15.3013
																	184.199	0.553049			771	0.738701																											-15.3058
																	184.305	0.553401			771.299	0.739171																											-15.3087
																	184.5	0.553754			772.297	0.739642																											-15.3215
																	184.699	0.554106			773.625	0.740113																											-15.3292
																	184.699	0.554459			774.625	0.740584																											-15.33
																	184.898	0.554811			775.719	0.741055																											-15.3302
																	184.906	0.555164			775.875	0.741525																											-15.3348
																	185.062	0.555516			776.562	0.741996																											-15.3395
																	185.301	0.555869			776.812	0.742467																											-15.3434
																	185.402	0.556221			777.312	0.742938																											-15.3654
																	185.5	0.556574			780.695	0.743409																											-15.3698
																	186.199	0.556926			783.801	0.743879																											-15.3728
																	186.875	0.557279			784.5	0.74435																											-15.3815
																	187.125	0.557631			785.703	0.744821																											-15.3965
																	187.301	0.557984			786.094	0.745292																											-15.3972
																	187.305	0.558336			786.406	0.745763																											-15.3985
																	187.602	0.558689			786.812	0.746234																											-15.4004
																	187.781	0.559041			787	0.746704																											-15.405
																	188.102	0.559394			788	0.747175																											-15.4075
																	188.102	0.559746			788.188	0.747646																											-15.4164
																	188.898	0.560099			788.797	0.748117																											-15.4205
																	188.906	0.560451			789	0.748588																											-15.4212
																	189.688	0.560804			792.875	0.749058																											-15.4258
																	190.102	0.561156			793.199	0.749529																											-15.4392
																	190.203	0.561509			796	0.75																											-15.4442
																	190.297	0.561861			796.906	0.750471																											-15.4468
																	190.398	0.562214			797.312	0.750942																											-15.4474
																	190.402	0.562566			798.625	0.751412																											-15.4509
																	190.902	0.562919			799.602	0.751883																											-15.4599
																	191.188	0.563271			799.906	0.752354																											-15.4639
																	191.5	0.563624			799.938	0.752825																											-15.4732
																	191.5	0.563976			801.312	0.753296																											-15.4751
																	191.6	0.564329			801.898	0.753766																											-15.4773
																	191.812	0.564681			802.5	0.754237																											-15.4785
																	192	0.565033			802.938	0.754708																											-15.4796
																	192.188	0.565386			804	0.755179																											-15.4851
																	192.199	0.565738			804.203	0.75565																											-15.4875
																	192.297	0.566091			809	0.756121																											-15.4913
																	192.398	0.566443			811.602	0.756591																											-15.4965
																	192.5	0.566796			811.898	0.757062																											-15.5015
																	192.5	0.567148			812.609	0.757533																											-15.5071
																	192.594	0.567501			813.703	0.758004																											-15.5085
																	192.598	0.567853			816.906	0.758475																											-15.5099
																	192.688	0.568206			818	0.758945																											-15.5126
																	192.695	0.568558			818.812	0.759416																											-15.5141
																	192.701	0.568911			819.109	0.759887																											-15.5163
																	192.781	0.569263			820	0.760358																											-15.5189
																	193.301	0.569616			822.406	0.760829																											-15.5202
																	193.391	0.569968			823.312	0.761299																											-15.5223
																	194	0.570321			824.098	0.76177																											-15.5268
																	194.5	0.570673			826.195	0.762241																											-15.5289
																	194.781	0.571026			826.391	0.762712																											-15.5388
																	195	0.571378			827.297	0.763183																											-15.5391
																	195	0.571731			833.5	0.763653																											-15.5394
																	195.094	0.572083			833.5	0.764124																											-15.5475
																	195.406	0.572436			835	0.764595																											-15.5541
																	195.602	0.572788			835	0.765066																											-15.56
																	196	0.573141			835.594	0.765537																											-15.5626
																	196.098	0.573493			838.602	0.766008																											-15.5693
																	196.2	0.573846			841.797	0.766478																											-15.5695
																	196.406	0.574198			846.5	0.766949																											-15.5709
																	196.438	0.574551			846.805	0.76742																											-15.5779
																	197.188	0.574903			847.906	0.767891																											-15.5796
																	197.301	0.575256			849.906	0.768362																											-15.5812
																	197.5	0.575608			850.5	0.768832																											-15.5853
																	197.602	0.575961			851	0.769303																											-15.603
																	197.719	0.576313			851.301	0.769774																											-15.6046
																	197.898	0.576665			851.398	0.770245																											-15.6075
																	198.305	0.577018			856.25	0.770716																											-15.6118
																	198.6	0.57737			857.125	0.771186																											-15.6161
																	198.688	0.577723			858.062	0.771657																											-15.6176
																	198.797	0.578075			861.438	0.772128																											-15.6204
																	199.094	0.578428			862.297	0.772599																											-15.6213
																	199.203	0.57878			863.438	0.77307																											-15.6332
																	199.5	0.579133			868	0.77354																											-15.6387
																	200.301	0.579485			869.5	0.774011																											-15.6654
																	200.301	0.579838			877.688	0.774482																											-15.6654
																	200.305	0.58019			885.598	0.774953																											-15.6706
																	200.312	0.580543			888.102	0.775424																											-15.6716
																	200.398	0.580895			889.703	0.775895																											-15.676
																	200.594	0.581248			889.891	0.776365																											-15.6764
																	200.598	0.5816			890.062	0.776836																											-15.6768
																	200.6	0.581953			892.297	0.777307																											-15.6857
																	201.781	0.582305			894.5	0.777778																											-15.6862
																	202.203	0.582658			894.898	0.778249																											-15.687
																	202.562	0.58301			897.5	0.778719																											-15.6911
																	202.906	0.583363			899.125	0.77919																											-15.6911
																	202.906	0.583715			899.902	0.779661																											-15.6915
																	203.4	0.584068			900.25	0.780132																											-15.7124
																	203.406	0.58442			901.594	0.780603																											-15.7172
																	203.5	0.584773			902.5	0.781073																											-15.7185
																	203.695	0.585125			903.703	0.781544																											-15.7209
																	204.281	0.585478			905.398	0.782015																											-15.7264
																	204.609	0.58583			906	0.782486																											-15.7303
																	204.701	0.586183			907	0.782957																											-15.7329
																	204.898	0.586535			913.094	0.783427																											-15.734
																	205.188	0.586888			913.797	0.783898																											-15.7341
																	205.25	0.58724			916.699	0.784369																											-15.7476
																	205.375	0.587593			917.301	0.78484																											-15.749
																	205.5	0.587945			920.699	0.785311																											-15.7514
																	205.5	0.588297			922.406	0.785782																											-15.7521
																	205.938	0.58865			930.703	0.786252																											-15.7578
																	206.312	0.589002			931.102	0.786723																											-15.7623
																	206.5	0.589355			933.625	0.787194																											-15.771
																	206.5	0.589707			934	0.787665																											-15.7743
																	206.906	0.59006			934.812	0.788136																											-15.7766
																	207	0.590412			935.203	0.788606																											-15.7788
																	207.094	0.590765			936	0.789077																											-15.7826
																	207.602	0.591117			941.188	0.789548																											-15.7831
																	207.602	0.59147			946.102	0.790019																											-15.7838
																	208	0.591822			949.688	0.79049																											-15.7904
																	208.5	0.592175			950.102	0.79096																											-15.808
																	208.5	0.592527			951.125	0.791431																											-15.825
																	208.5	0.59288			951.312	0.791902																											-15.8267
																	209.199	0.593232			951.875	0.792373																											-15.8371
																	209.2	0.593585			952.188	0.792844																											-15.8408
																	209.281	0.593937			953.203	0.793315																											-15.8421
																	209.375	0.59429			955.203	0.793785																											-15.8441
																	210	0.594642			959.125	0.794256																											-15.8487
																	210.301	0.594995			960.5	0.794727																											-15.8489
																	210.312	0.595347			961.102	0.795198																											-15.8529
																	210.375	0.5957			962.297	0.795669																											-15.865
																	210.406	0.596052			962.875	0.796139																											-15.8754
																	210.406	0.596405			963.301	0.79661																											-15.8761
																	210.5	0.596757			964	0.797081																											-15.8821
																	210.801	0.59711			967.906	0.797552																											-15.8875
																	210.812	0.597462			971.898	0.798023																											-15.8911
																	211.5	0.597815			977.312	0.798493																											-15.8919
																	211.902	0.598167			978.703	0.798964																											-15.8964
																	212.5	0.59852			979.375	0.799435																											-15.8969
																	212.898	0.598872			979.797	0.799906																											-15.8979
																	212.898	0.599225			979.797	0.800377																											-15.9106
																	213.301	0.599577			980.297	0.800847																											-15.9164
																	213.305	0.59993			982	0.801318																											-15.9194
																	213.375	0.600282			988.094	0.801789																											-15.9201
																	213.5	0.600634			990.5	0.80226																											-15.925
																	213.602	0.600987			992.203	0.802731																											-15.9313
																	213.625	0.601339			994	0.803202																											-15.9349
																	213.688	0.601692			995.098	0.803672																											-15.9389
																	213.801	0.602044			996	0.804143																											-15.9436
																	213.812	0.602397			1000.5	0.804614																											-15.9457
																	214	0.602749			1002	0.805085																											-15.9526
																	214.5	0.603102			1004.2	0.805556																											-15.953
																	214.5	0.603454			1004.5	0.806026																											-15.9571
																	214.6	0.603807			1005.9	0.806497																											-15.9711
																	214.906	0.604159			1007.62	0.806968																											-15.9722
																	215.188	0.604512			1010.1	0.807439																											-15.973
																	215.195	0.604864			1010.5	0.80791																											-15.9788
																	215.5	0.605217			1014.3	0.80838																											-15.981
																	215.594	0.605569			1014.4	0.808851																											-15.9894
																	215.688	0.605922			1014.8	0.809322																											-15.9957
																	216.109	0.606274			1017.19	0.809793																											-15.9995
																	216.297	0.606627			1019.98	0.810264																											-16.0021
																	217	0.606979			1020.4	0.810734																											-16.0163
																	217.102	0.607332			1021.2	0.811205																											-16.024
																	217.201	0.607684			1022.5	0.811676																											-16.0357
																	217.297	0.608037			1025.3	0.812147																											-16.0408
																	217.5	0.608389			1026.41	0.812618																											-16.0454
																	217.695	0.608742			1036.31	0.813089																											-16.049
																	217.898	0.609094			1037.89	0.813559																											-16.0537
																	218.281	0.609447			1041	0.81403																											-16.0594
																	218.398	0.609799			1042.1	0.814501																											-16.0596
																	218.5	0.610152			1045.8	0.814972																											-16.0655
																	218.602	0.610504			1046.59	0.815443																											-16.0745
																	219.406	0.610857			1051.59	0.815913																											-16.0759
																	220.102	0.611209			1054.5	0.816384																											-16.0835
																	220.301	0.611562			1054.8	0.816855																											-16.0874
																	220.406	0.611914			1060.89	0.817326																											-16.0953
																	220.703	0.612266			1062.4	0.817797																											-16.1263
																	220.801	0.612619			1066.6	0.818267																											-16.1265
																	220.805	0.612971			1068.2	0.818738																											-16.1306
																	221.281	0.613324			1074.31	0.819209																											-16.1426
																	221.4	0.613676			1075.8	0.81968																											-16.146
																	221.805	0.614029			1078.31	0.820151																											-16.1498
																	222	0.614381			1081	0.820621																											-16.1532
																	222.102	0.614734			1082.11	0.821092																											-16.1623
																	222.699	0.615086			1082.88	0.821563																											-16.1659
																	222.875	0.615439			1083.8	0.822034																											-16.1694
																	222.938	0.615791			1085.91	0.822505																											-16.1713
																	223.125	0.616144			1086.3	0.822976																											-16.1782
																	223.398	0.616496			1087.9	0.823446																											-16.1829
																	223.406	0.616849			1091.1	0.823917																											-16.1884
																	223.601	0.617201			1095	0.824388																											-16.2037
																	224	0.617554			1095.62	0.824859																											-16.2168
																	224.1	0.617906			1097.9	0.82533																											-16.2231
																	224.406	0.618259			1102.5	0.8258																											-16.2379
																	224.602	0.618611			1103.91	0.826271																											-16.2411
																	225	0.618964			1104.7	0.826742																											-16.2492
																	225.1	0.619316			1107.11	0.827213																											-16.2521
																	225.3	0.619669			1108.1	0.827684																											-16.2588
																	225.898	0.620021			1111.69	0.828154																											-16.2619
																	226.195	0.620374			1111.7	0.828625																											-16.2626
																	226.797	0.620726			1113.5	0.829096																											-16.2637
																	227.094	0.621079			1116.61	0.829567																											-16.267
																	227.3	0.621431			1117.3	0.830038																											-16.2715
																	227.312	0.621784			1121.81	0.830508																											-16.2717
																	227.598	0.622136			1124.78	0.830979																											-16.2897
																	227.602	0.622489			1135.19	0.83145																											-16.2934
																	227.812	0.622841			1136.78	0.831921																											-16.2935
																	230	0.623194			1137.5	0.832392																											-16.2965
																	231.594	0.623546			1138.88	0.832863																											-16.2982
																	231.598	0.623898			1139.69	0.833333																											-16.3061
																	232	0.624251			1142.6	0.833804																											-16.3258
																	232.406	0.624603			1147.69	0.834275																											-16.327
																	232.598	0.624956			1151.5	0.834746																											-16.3325
																	232.699	0.625308			1151.9	0.835217																											-16.3327
																	232.898	0.625661			1161.39	0.835687																											-16.3347
																	233.094	0.626013			1161.5	0.836158																											-16.3374
																	233.102	0.626366			1164	0.836629																											-16.342
																	233.402	0.626718			1166	0.8371																											-16.343
																	233.625	0.627071			1168.5	0.837571																											-16.346
																	234.1	0.627423			1174	0.838041																											-16.3465
																	235.203	0.627776			1174.2	0.838512																											-16.36
																	235.406	0.628128			1175.19	0.838983																											-16.3627
																	235.8	0.628481			1177.41	0.839454																											-16.3652
																	236	0.628833			1177.5	0.839925																											-16.3676
																	236.312	0.629186			1179.2	0.840395																											-16.3822
																	236.898	0.629538			1179.91	0.840866																											-16.389
																	237.125	0.629891			1183.22	0.841337																											-16.3923
																	237.625	0.630243			1187.7	0.841808																											-16.3987
																	237.902	0.630596			1192.61	0.842279																											-16.3994
																	238	0.630948			1194.7	0.84275																											-16.4198
																	238	0.631301			1195.5	0.84322																											-16.4202
																	238.406	0.631653			1198	0.843691																											-16.4207
																	238.5	0.632006			1200.4	0.844162																											-16.4228
																	238.797	0.632358			1202.5	0.844633																											-16.4233
																	238.906	0.632711			1203.6	0.845104																											-16.4275
																	239.188	0.633063			1204.7	0.845574																											-16.4334
																	239.781	0.633416			1204.8	0.846045																											-16.437
																	240.406	0.633768			1204.81	0.846516																											-16.4447
																	240.699	0.634121			1208.1	0.846987																											-16.4466
																	241.094	0.634473			1208.41	0.847458																											-16.4495
																	241.102	0.634826			1216.3	0.847928																											-16.457
																	241.594	0.635178			1218.6	0.848399																											-16.4595
																	241.625	0.63553			1226.39	0.84887																											-16.4716
																	241.695	0.635883			1228.2	0.849341																											-16.4772
																	241.781	0.636235			1229.09	0.849812																											-16.483
																	242	0.636588			1239.7	0.850282																											-16.488
																	242.5	0.63694			1243.5	0.850753																											-16.494
																	242.812	0.637293			1243.91	0.851224																											-16.5059
																	243.594	0.637645			1244.91	0.851695																											-16.5164
																	244.109	0.637998			1248.2	0.852166																											-16.5234
																	244.938	0.63835			1249.7	0.852637																											-16.5352
																	245.098	0.638703			1249.7	0.853107																											-16.5353
																	246	0.639055			1251.1	0.853578																											-16.5365
																	246.125	0.639408			1257.78	0.854049																											-16.5413
																	246.188	0.63976			1261.7	0.85452																											-16.5418
																	246.598	0.640113			1264.72	0.854991																											-16.5473
																	246.699	0.640465			1265.61	0.855461																											-16.5479
																	246.812	0.640818			1265.8	0.855932																											-16.5562
																	247.102	0.64117			1266.7	0.856403																											-16.5574
																	247.203	0.641523			1267.4	0.856874																											-16.5722
																	249.602	0.641875			1270.39	0.857345																											-16.5742
																	249.695	0.642228			1277.8	0.857815																											-16.594
																	249.695	0.64258			1284.5	0.858286																											-16.599
																	249.812	0.642933			1285.3	0.858757																											-16.5993
																	249.875	0.643285			1293	0.859228																											-16.5994
																	249.9	0.643638			1293.3	0.859699																											-16.6022
																	250.297	0.64399			1295.5	0.860169																											-16.6219
																	250.297	0.644343			1304.2	0.86064																											-16.6235
																	250.312	0.644695			1304.38	0.861111																											-16.6244
																	250.406	0.645048			1309	0.861582																											-16.6246
																	250.898	0.6454			1314.39	0.862053																											-16.6264
																	251.312	0.645753			1315.09	0.862524																											-16.6332
																	251.406	0.646105			1319.4	0.862994																											-16.643
																	251.797	0.646458			1320.5	0.863465																											-16.6449
																	252.406	0.64681			1323	0.863936																											-16.649
																	252.594	0.647162			1326.25	0.864407																											-16.6567
																	252.906	0.647515			1326.3	0.864878																											-16.6577
																	253	0.647867			1332	0.865348																											-16.6595
																	253	0.64822			1333.6	0.865819																											-16.6806
																	253.102	0.648572			1335.6	0.86629																											-16.6873
																	253.781	0.648925			1339.8	0.866761																											-16.6912
																	254	0.649277			1340.8	0.867232																											-16.6977
																	254.094	0.64963			1354.5	0.867702																											-16.7031
																	254.6	0.649982			1360.5	0.868173																											-16.7112
																	255.5	0.650335			1362.1	0.868644																											-16.7297
																	255.801	0.650687			1364.7	0.869115																											-16.7323
																	255.812	0.65104			1366.69	0.869586																											-16.7389
																	255.891	0.651392			1366.7	0.870056																											-16.7397
																	256	0.651745			1369	0.870527																											-16.751
																	256.297	0.652097			1371.5	0.870998																											-16.7582
																	256.801	0.65245			1374.2	0.871469																											-16.7583
																	257.098	0.652802			1378.7	0.87194																											-16.7654
																	258.094	0.653155			1390.1	0.872411																											-16.7699
																	258.094	0.653507			1392.81	0.872881																											-16.7717
																	258.094	0.65386			1395.75	0.873352																											-16.7775
																	258.188	0.654212			1397.09	0.873823																											-16.7787
																	258.906	0.654565			1397.09	0.874294																											-16.7823
																	259.594	0.654917			1398.8	0.874765																											-16.7957
																	260	0.65527			1403.81	0.875235																											-16.8012
																	261.102	0.655622			1405.2	0.875706																											-16.804
																	261.562	0.655975			1411.6	0.876177																											-16.8091
																	262.4	0.656327			1411.69	0.876648																											-16.818
																	262.5	0.65668			1412.7	0.877119																											-16.8205
																	262.812	0.657032			1415	0.877589																											-16.8297
																	263.102	0.657385			1423.4	0.87806																											-16.8325
																	263.312	0.657737			1439.6	0.878531																											-16.8336
																	264.301	0.65809			1441.41	0.879002																											-16.8359
																	264.406	0.658442			1441.5	0.879473																											-16.8441
																	264.598	0.658795			1459.2	0.879944																											-16.8485
																	264.898	0.659147			1460.5	0.880414																											-16.8616
																	264.9	0.659499			1464.5	0.880885																											-16.8654
																	266.699	0.659852			1468	0.881356																											-16.8664
																	267.281	0.660204			1480	0.881827																											-16.8769
																	267.5	0.660557			1495.09	0.882298																											-16.88
																	267.594	0.660909			1502.3	0.882768																											-16.8972
																	267.799	0.661262			1503.41	0.883239																											-16.9355
																	267.801	0.661614			1518.09	0.88371																											-16.943
																	268.102	0.661967			1518.19	0.884181																											-16.9463
																	268.305	0.662319			1526.75	0.884652																											-16.9537
																	268.598	0.662672			1531.91	0.885122																											-16.9558
																	268.906	0.663024			1544.3	0.885593																											-16.9587
																	269	0.663377			1552	0.886064																											-16.9602
																	270.094	0.663729			1557.81	0.886535																											-16.9644
																	270.102	0.664082			1564.59	0.887006																											-16.9698
																	270.301	0.664434			1580.5	0.887476																											-16.9713
																	270.391	0.664787			1582.1	0.887947																											-16.9756
																	271.906	0.665139			1584.3	0.888418																											-16.976
																	272	0.665492			1588.56	0.888889																											-16.989
																	272.188	0.665844			1592.5	0.88936																											-16.9927
																	272.203	0.666197			1598.75	0.889831																											-17.0111
																	272.297	0.666549			1600.4	0.890301																											-17.0116
																	273	0.666902			1601.8	0.890772																											-17.0207
																	273.5	0.667254			1602.8	0.891243																											-17.0288
																	273.805	0.667607			1608.59	0.891714																											-17.0381
																	275.094	0.667959			1627.5	0.892185																											-17.0384
																	275.102	0.668312			1635.5	0.892655																											-17.0397
																	275.5	0.668664			1638.19	0.893126																											-17.0405
																	275.797	0.669017			1645.6	0.893597																											-17.0425
																	276.094	0.669369			1658.8	0.894068																											-17.0455
																	276.812	0.669722			1660.09	0.894539																											-17.0459
																	277.299	0.670074			1675.4	0.895009																											-17.0469
																	277.5	0.670427			1680.4	0.89548																											-17.0486
																	277.594	0.670779			1684.4	0.895951																											-17.0523
																	278.406	0.671131			1684.5	0.896422																											-17.0613
																	280.281	0.671484			1684.89	0.896893																											-17.08
																	281	0.671836			1687.89	0.897363																											-17.0925
																	281.281	0.672189			1714.3	0.897834																											-17.0968
																	282.398	0.672541			1728.44	0.898305																											-17.1038
																	282.406	0.672894			1736.5	0.898776																											-17.1146
																	282.438	0.673246			1747	0.899247																											-17.1217
																	282.688	0.673599			1748.4	0.899718																											-17.1225
																	282.699	0.673951			1755.2	0.900188																											-17.1241
																	282.812	0.674304			1762.2	0.900659																											-17.1376
																	282.938	0.674656			1762.7	0.90113																											-17.1396
																	283.188	0.675009			1775.3	0.901601																											-17.1453
																	283.438	0.675361			1776.4	0.902072																											-17.146
																	283.594	0.675714			1776.5	0.902542																											-17.1482
																	283.906	0.676066			1780.09	0.903013																											-17.1489
																	284.5	0.676419			1790.9	0.903484																											-17.156
																	285.201	0.676771			1791.9	0.903955																											-17.1624
																	286.098	0.677124			1793	0.904426																											-17.1655
																	286.5	0.677476			1803.11	0.904896																											-17.1699
																	287.797	0.677829			1808.5	0.905367																											-17.1734
																	288.188	0.678181			1815.41	0.905838																											-17.1779
																	288.594	0.678534			1820.8	0.906309																											-17.1788
																	288.898	0.678886			1829.62	0.90678																											-17.1806
																	288.906	0.679239			1832.81	0.90725																											-17.1809
																	289.102	0.679591			1835.8	0.907721																											-17.1811
																	289.301	0.679944			1836	0.908192																											-17.1863
																	289.5	0.680296			1837.9	0.908663																											-17.1933
																	290.098	0.680649			1843.3	0.909134																											-17.1996
																	291.062	0.681001			1844	0.909605																											-17.2024
																	291.188	0.681354			1844.5	0.910075																											-17.2157
																	291.406	0.681706			1853.6	0.910546																											-17.2234
																	292	0.682059			1854.6	0.911017																											-17.225
																	292	0.682411			1879.3	0.911488																											-17.2267
																	293.188	0.682763			1887.69	0.911959																											-17.2279
																	293.305	0.683116			1893.2	0.912429																											-17.2409
																	293.594	0.683468			1895.38	0.9129																											-17.2491
																	294.094	0.683821			1896.91	0.913371																											-17.2493
																	294.188	0.684173			1903.41	0.913842																											-17.2497
																	294.312	0.684526			1911.28	0.914313																											-17.2589
																	294.898	0.684878			1911.44	0.914783																											-17.2702
																	295.098	0.685231			1914.91	0.915254																											-17.2772
																	295.312	0.685583			1915.91	0.915725																											-17.2811
																	295.699	0.685936			1917	0.916196																											-17.2829
																	295.797	0.686288			1917.59	0.916667																											-17.2903
																	296.094	0.686641			1919.11	0.917137																											-17.2905
																	296.875	0.686993			1961.41	0.917608																											-17.3147
																	297.094	0.687346			1965.5	0.918079																											-17.3209
																	297.188	0.687698			1966	0.91855																											-17.3312
																	297.195	0.688051			1967.7	0.919021																											-17.3436
																	298.1	0.688403			1970.4	0.919492																											-17.347
																	299.098	0.688756			1975.1	0.919962																											-17.3479
																	300.102	0.689108			1976.5	0.920433																											-17.357
																	300.406	0.689461			1977.94	0.920904																											-17.3893
																	300.5	0.689813			1985.5	0.921375																											-17.3929
																	300.699	0.690166			1998.91	0.921846																											-17.4073
																	300.906	0.690518			1999.8	0.922316																											-17.4102
																	301	0.690871			2007.59	0.922787																											-17.4149
																	302	0.691223			2017.5	0.923258																											-17.4261
																	302.188	0.691576			2019.7	0.923729																											-17.4317
																	302.301	0.691928			2038.41	0.9242																											-17.4369
																	302.699	0.692281			2039.78	0.92467																											-17.4378
																	303.801	0.692633			2040.09	0.925141																											-17.4388
																	304	0.692986			2041	0.925612																											-17.4446
																	304.199	0.693338			2041.5	0.926083																											-17.4515
																	304.5	0.693691			2045.3	0.926554																											-17.4573
																	304.812	0.694043			2047.59	0.927024																											-17.4629
																	305.098	0.694395			2050.8	0.927495																											-17.4647
																	305.301	0.694748			2055	0.927966																											-17.4663
																	305.5	0.6951			2059.7	0.928437																											-17.477
																	305.602	0.695453			2076	0.928908																											-17.4902
																	305.703	0.695805			2087.69	0.929379																											-17.4908
																	305.781	0.696158			2103.61	0.929849																											-17.491
																	306.094	0.69651			2114.31	0.93032																											-17.4934
																	306.125	0.696863			2115	0.930791																											-17.5
																	307.875	0.697215			2116.3	0.931262																											-17.5127
																	308	0.697568			2116.7	0.931733																											-17.5136
																	308.898	0.69792			2117.8	0.932203																											-17.5138
																	309	0.698273			2124.25	0.932674																											-17.5292
																	309	0.698625			2125.8	0.933145																											-17.5333
																	310	0.698978			2127.31	0.933616																											-17.5439
																	310.203	0.69933			2132.5	0.934087																											-17.548
																	310.5	0.699683			2134.8	0.934557																											-17.5532
																	310.797	0.700035			2135.3	0.935028																											-17.5543
																	311	0.700388			2142.1	0.935499																											-17.5618
																	311.188	0.70074			2154	0.93597																											-17.5648
																	311.406	0.701093			2155.3	0.936441																											-17.57
																	311.7	0.701445			2162.8	0.936911																											-17.5703
																	312	0.701798			2164	0.937382																											-17.5832
																	312.406	0.70215			2174.2	0.937853																											-17.5909
																	315.199	0.702503			2177.8	0.938324																											-17.5988
																	316.812	0.702855			2192.2	0.938795																											-17.5998
																	318	0.703208			2195.5	0.939266																											-17.6031
																	318.125	0.70356			2199.7	0.939736																											-17.6035
																	318.281	0.703913			2223.3	0.940207																											-17.612
																	318.781	0.704265			2227.69	0.940678																											-17.6123
																	319.062	0.704618			2231.72	0.941149																											-17.6179
[truncated: 3,010 more rows]
[truncated: 11 more columns]
