# Supplementary material for: Latrophilin GPCR signaling mediates synapse formation
Source: eLife. 2021 Mar 1;10:e65717. doi: 10.7554/eLife.65717 (PMC7954527; doi:10.7554/eLife.65717)
Supplement: Figure 4—figure supplement 1—source data 1. [file elife-65717-fig4-figsupp1-data1.xlsx]

## Sheet: Sheet1
	Figure 4-supplemental figure 1B																Figure 4-supplemental figure 1C
	Lphn2 and 3 rescue CA1 capacitance and input resistance
	Latrophilin-2																Latrophilin-3
	Cm								Rm								Cm								Rm
	Control	CRE	WTR	T4LR					Control	CRE	WTR	T4LR					Control	CRE	WTR	T4LR					Control	CRE	WTR	T4LR
	202.2	120.4	199	187					99.7	91.3	82.4	72.1					199.2	211.3	196.3	196.7					122.9	133.9	122.2	95.6
	184.3	111.3	121	188.7					110	101.4	116.2	93.4					101.3	113.6	125	187					140.4	100.6	155.2	103.6
	194.3	151.2	188.2	131.4					162.1	88.2	191.3	151.2					133.5	143.2	184.6	186.2					125	91.9	149.5	139.3
	101.3	198.3	190.2	101.4					145.3	97.4	76.4	113					99.3	132.3	197.6	177.6					133.6	159.6	133.3	84.7
	123.1	182.3	187.1	200.4					75.5	161.1	81.7	162.1					157.6	199.3	151.8	164.3					87.6	144.4	99.3	91.3
	169.3	201.3	144.2	192					94.3	169	112	144.4					178.9	197.3	142.5	110.3					152.3	87.3	88.9	156.3
	192.3	174.3	166.3	181.6					162.4	133.2	87.4	113.4					202.8	129.3	200.6	182.5					110.3	77.8	161.3	149.6
	188.3	193.2	150.9	175.3					155.6	141	181.4	101.1					192.8	180.2	183.6	203.6					75.2	181.2	157.6	98.6
	156.2	144.2	101.3	113					75.4	152	167.1	95.5						175.5								156.9
	206.5	156.4	200.3	212.3					92.3	95.6	134.2	87.4
	195.6	101.2		193.2					120.4	87.4		112.1
				162.3								143.2					ANOVA summary								ANOVA summary
				187.3								91.5					F	0.4386							F	0.5855
				199.6								87.3					P value	0.7271							P value	0.6294
				190.2								65.4					P value summary	ns							P value summary	ns
				180.4								176.5					Significant diff. among means (P < 0.05)?	No							Significant diff. among means (P < 0.05)?	No
																	R squared	0.0434							R squared	0.05711
	ANOVA summary								ANOVA summary
	F	0.6943							F	0.1787							Tukey's multiple comparisons test	Mean Diff.	95.00% CI of diff.	Significant?	Summary	Adjusted P Value			Tukey's multiple comparisons test	Mean Diff.	95.00% CI of diff.	Significant?	Summary	Adjusted P Value
	P value	0.5605							P value	0.9103							Control vs. CRE	-6.492	-52.17 to 39.19	No	ns	0.9799			Control vs. CRE	-7.543	-48.00 to 32.92	No	ns	0.9565
	P value summary	ns							P value summary	ns							Control vs. WTR	-14.58	-61.58 to 32.43	No	ns	0.8327			Control vs. WTR	-15	-56.63 to 26.63	No	ns	0.7609
	Significant diff. among means (P < 0.05)?	No							Significant diff. among means (P < 0.05)?	No							Control vs. T4LR	-17.85	-64.86 to 29.16	No	ns	0.7308			Control vs. T4LR	3.537	-38.09 to 45.17	No	ns	0.9955
	R squared	0.0452							R squared	0.01204							CRE vs. WTR	-8.083	-53.77 to 37.60	No	ns	0.9625			CRE vs. WTR	-7.457	-47.92 to 33.00	No	ns	0.9579
																	CRE vs. T4LR	-11.36	-57.04 to 34.32	No	ns	0.9048			CRE vs. T4LR	11.08	-29.38 to 51.54	No	ns	0.8775
	Tukey's multiple comparisons test	Mean Diff.	95.00% CI of diff.	Significant?	Summary	Adjusted P Value			Tukey's multiple comparisons test	Mean Diff.	95.00% CI of diff.	Significant?	Summary	Adjusted P Value			WTR vs. T4LR	-3.275	-50.28 to 43.73	No	ns	0.9975			WTR vs. T4LR	18.54	-23.09 to 60.17	No	ns	0.6237
	Control vs. CRE	16.3	-22.20 to 54.80	No	ns	0.6729			Control vs. CRE	-2.236	-42.44 to 37.96	No	ns	0.9988
	Control vs. WTR	9.095	-30.35 to 48.54	No	ns	0.9266			Control vs. WTR	-5.465	-46.66 to 35.73	No	ns	0.9846
	Control vs. T4LR	-0.8108	-36.17 to 34.55	No	ns	>0.9999			Control vs. T4LR	4.445	-32.48 to 41.37	No	ns	0.9884
	CRE vs. WTR	-7.205	-46.65 to 32.24	No	ns	0.9614			CRE vs. WTR	-3.228	-44.42 to 37.96	No	ns	0.9967
	CRE vs. T4LR	-17.11	-52.47 to 18.25	No	ns	0.5728			CRE vs. T4LR	6.682	-30.24 to 43.61	No	ns	0.9624
	WTR vs. T4LR	-9.906	-46.30 to 26.49	No	ns	0.8859			WTR vs. T4LR	9.91	-28.09 to 47.91	No	ns	0.898
