# Supplementary material for: Latrophilin GPCR signaling mediates synapse formation
Source: eLife. 2021 Mar 1;10:e65717. doi: 10.7554/eLife.65717 (PMC7954527; doi:10.7554/eLife.65717)
Supplement: Figure 4—source data 1. [file elife-65717-fig4-data1.xlsx]

## Sheet: Sheet1
	Figure 4B and C																																						Figure 4E and F
			Rescue of Lphn2 cKO with T4L/WT Lphn2																																					Rescue of Lphn2 cKO with T4L/WT Lphn2
																																								Control perforant pathway						slope			Cre perforant pathway
			Control Schaffer collateral						slope			Cre Schaffer collateral						slope			WT Lphn2 rescue Schaffer collateral						slope			T4L Lphn2 rescue Schaffer collateral						slope			Stimulation intensity (uA)	20	40	60	80	100	120				20
	Stimulation intensity (uA)		20	40	60	80	100	120				20	40	60	80	100	120				20	40	60	80	100	120				20	40	60	80	100	120					30.9	95.3	168.3	256.8	295	369.8	3.4			16.8
			84.6	281.1	387.2	534.1	668.3	1016.5	8.53			465	1204.1	1578.2	2049.8	1988.9	2007.4	15.05			301.5	517.5	770.8	992.8	1581	1497.3	13.41			496.6	1127.2	1419.1	1512.3	1380.1	1446.3	8				19.4	49.2	112.9	187.9	265.9	300.3	3.04			2.8
			876.2	1550.8	2107.1	2552.1	2455.1	2889.6	18.89			302.2	795.3	1232.9	1789.4	1977.8	2248.5	19.76			510	972.8	1277.6	1683.8	2017.6	2170.7	16.92			183.1	543.6	773.5	1052.3	1215.2	1291	11.19				33	38.8	74.2	143.2	210.1	239.5	2.31			3.5
			206.8	758.3	1418	1570.1	1629.3	1699.6	14.61			40.4	361	820.3	962	1238.1	2048.6	18.31			289.6	638.9	854.2	1224.4	1572	1634.4	14.13			39.4	108	421.3	722.3	896.7	1307.1	12.87				162.6	296.9	408.9	474.4	518.1	622.3	4.33			0.4
			187.6	391.1	607.7	631.2	741.8	739.9	5.48			119.8	636.4	913.8	1135	1038.7	994.3	8.28			676	1362.7	1616.8	2018.7	1971.8	2015.5	12.75			308.8	934.2	1108.5	1365.1	1859.9	1890	15.63				178.7	600.5	762.7	802.1	748	810.9	5.2			19.7
			105.6	271.2	341.2	500.5	898.2	959.4	9.01			99.9	412.7	497.6	743	816.6	1221.2	10.1			64.3	114.1	234.3	487.4	527.1	551.9	5.61			730.5	1542.7	1818.1	1813	1964.5	2053.6	11.25				169.4	334.2	445.3	461.4	464.2	545.4	3.27			61
			171.3	781	1048.7	1115.4	1089.1	1210.9	8.84			509.2	1387.3	1712.6	2283.7	2466.2	2631.3	20.6			153.8	224.4	674.6	980.6	1001.3	1121.1	10.67			6.1	197.1	607.4	878.9	1089.5	1353.8	13.83				84.7	224.2	328.4	372.8	422.1	615.4	4.7			28.2
			255.2	680.7	912.4	1479.6	1659.7	1749	15.67			15.6	111.2	287.7	585.8	881.3	920.3	10.18			123.9	493.3	940.3	1109.3	1317.5	1488.2	13.52			244.3	715.9	852.2	1077.9	1338.6	2258.1	17.38				27.9	226.7	294.1	344.5	464	546.8	4.79			2.4
			130.1	311.8	480.7	597	1022.7	1059	9.85			33.5	106.4	258.9	472.1	588	1184.1	10.58			55.7	226.3	862.3	1245.1	1466.3	1627.7	17.09			55.1	310.1	694.5	1286.5	1552.5	1720.3	18.07				9.4	131.8	284.2	496.5	698.4	902.2	9.12			117.1
			158.3	421.1	853.7	1186.5	1316.7	1661.3	15.04			98.3	387.6	553.4	715	1439.4	1345.6	13.64			64.8	191.7	334.4	461.4	1343.6	1180.4	13.08			191.9	924.8	1070.9	1540.2	1700.4	1728.3	14.97				162.5	503.1	681.4	891.2	979	1018.9	8.45			14.4
			148.4	544.9	1240.4	1388.8	1526.5	1665	15.25			180.9	795.1	888.3	956.3	1076.9	1317.3	9.42			97.5	446.5	672.3	821	1270.8	1291.1	12.27			319.9	974	1257.8	1657.1	1662.4	1933.6	15.05				209.1	599.5	797.5	976.4	937.9	1018.6	7.49			12.1
			105.5	324.8	512.9	630.6	1305.7	1209.4	12.25			485.6	1212.8	1653.1	2305.5	2344	2298.4	18.72												84	411.7	989	2076.4	2115.6	2267	24.44
																														90.9	761.4	590.5	779.4	915	951.7	7.08												Slope analysis
																														50.3	206.3	483	630.5	1061	1086.8	11.28			Two-way ANOVA	Ordinary								ANOVA summary
											Slope analysis																			431.7	1172.1	1147.5	1527.7	1568.4	1668.5	11.08			Alpha	0.05								F	4.49
			Two-way ANOVA	Ordinary							ANOVA summary																			141.8	704.8	1010.3	1504.1	1560.5	1665.6	15.26												P value	0.0078
			Alpha	0.05							F	0.4053																		133.6	337.6	413.6	649	666	789.7	6.43			Source of Variation	% of total variation	P value	P value summary	Significant?					P value summary	**
											P value	0.7499																											Interaction	2.405	0.503	ns	No					Significant diff. among means (P < 0.05)?	Yes
			Source of Variation	% of total variation	P value	P value summary	Significant?				P value summary	ns																											Row Factor	30.29	<0.0001	****	Yes					R squared	0.2344
			Interaction	0.3494	>0.9999	ns	No				Significant diff. among means (P < 0.05)?	No																											Column Factor	23.74	<0.0001	****	Yes
			Row Factor	49.37	<0.0001	****	Yes				R squared	0.02689																																				Tukey's multiple comparisons test	Mean Diff.
			Column Factor	0.5865	0.3581	ns	No																																ANOVA table	SS (Type III)	DF	MS	F (DFn, DFd)	P value				Control vs. CRE	2.284
											Tukey's multiple comparisons test	Mean Diff.	95.00% CI of diff.	Significant?	Summary	Adjusted P Value																							Interaction	408940	15	27263	F (15, 264) = 0.9556	P=0.5030				Control vs. WT rescue	0.384
			ANOVA table	SS (Type III)	DF	MS	F (DFn, DFd)	P value			Control vs. CRE	-1.929	-6.737 to 2.879	No	ns	0.7086																							Row Factor	5150208	5	1030042	F (5, 264) = 36.10	P<0.0001				Control vs. T4L rescue	2.033
			Interaction	406155	15	27077	F (15, 264) = 0.1287	P>0.9999			Control vs. WT rescue	-0.8159	-5.742 to 4.110	No	ns	0.9708																							Column Factor	4036637	3	1345546	F (3, 264) = 47.16	P<0.0001				CRE vs. WT rescue	-1.9
			Row Factor	57378714	5	11475743	F (5, 264) = 54.53	P<0.0001			Control vs. T4L rescue	-1.234	-5.650 to 3.182	No	ns	0.8778																							Residual	7531736	264	28529						CRE vs. T4L rescue	-0.2511
			Column Factor	681691	3	227230	F (3, 264) = 1.080	P=0.3581			CRE vs. WT rescue	1.113	-3.813 to 6.040	No	ns	0.9305																																WT rescue vs. T4L rescue	1.649
			Residual	55559350	264	210452					CRE vs. T4L rescue	0.6951	-3.721 to 5.111	No	ns	0.9747																							Tukey's multiple comparisons test	Predicted (LS) mean diff.	95.00% CI of diff.	Significant?	Summary	Adjusted P Value
											WT rescue vs. T4L rescue	-0.4181	-4.963 to 4.127	No	ns	0.9947
																																							Row 1
			Tukey's multiple comparisons test	Predicted (LS) mean diff.	95.00% CI of diff.	Significant?	Summary	Adjusted P Value																															Control vs. CRE	73.56	-112.6 to 259.8	No	ns	0.7371
																																							Control vs. WT rescue	-48.78	-239.6 to 142.0	No	ns	0.9116
			Row 1																																				Control vs. T4L rescue	52.82	-118.2 to 223.9	No	ns	0.8551
			Control vs. CRE	7.2	-498.5 to 512.9	No	ns	>0.9999																															CRE vs. WT rescue	-122.3	-313.1 to 68.47	No	ns	0.3483
			Control vs. WT rescue	-12.84	-531.1 to 505.4	No	ns	>0.9999																															CRE vs. T4L rescue	-20.75	-191.8 to 150.3	No	ns	0.9893
			Control vs. T4L rescue	1.623	-462.9 to 466.2	No	ns	>0.9999																															WT rescue vs. T4L rescue	101.6	-74.45 to 277.6	No	ns	0.4437
			CRE vs. WT rescue	-20.04	-538.3 to 498.2	No	ns	0.9996
			CRE vs. T4L rescue	-5.577	-470.1 to 459.0	No	ns	>0.9999																															Row 2
			WT rescue vs. T4L rescue	14.46	-463.7 to 492.6	No	ns	0.9998																															Control vs. CRE	213.4	27.22 to 399.6	Yes	*	0.0174
																																							Control vs. WT rescue	-37.54	-228.4 to 153.3	No	ns	0.957
			Row 2																																				Control vs. T4L rescue	188	16.96 to 359.1	Yes	*	0.0248
			Control vs. CRE	-99.37	-605.1 to 406.4	No	ns	0.9571																															CRE vs. WT rescue	-251	-441.8 to -60.16	Yes	**	0.0043
			Control vs. WT rescue	55.43	-462.8 to 573.7	No	ns	0.9926																															CRE vs. T4L rescue	-25.42	-196.5 to 145.6	No	ns	0.9807
			Control vs. T4L rescue	-111.5	-576.0 to 353.1	No	ns	0.9255																															WT rescue vs. T4L rescue	225.5	49.51 to 401.6	Yes	**	0.0058
			CRE vs. WT rescue	154.8	-363.4 to 673.0	No	ns	0.8669
			CRE vs. T4L rescue	-12.09	-476.7 to 452.5	No	ns	0.9999																															Row 3
			WT rescue vs. T4L rescue	-166.9	-645.0 to 311.2	No	ns	0.8035																															Control vs. CRE	243.7	57.54 to 430.0	Yes	**	0.0045
																																							Control vs. WT rescue	-51.85	-242.7 to 139.0	No	ns	0.896
			Row 3																																				Control vs. T4L rescue	231	60.00 to 402.1	Yes	**	0.0031
			Control vs. CRE	-44.25	-550.0 to 461.5	No	ns	0.9959																															CRE vs. WT rescue	-295.6	-486.4 to -104.8	Yes	***	0.0005
			Control vs. WT rescue	77.15	-441.1 to 595.4	No	ns	0.9806																															CRE vs. T4L rescue	-12.7	-183.7 to 158.3	No	ns	0.9975
			Control vs. T4L rescue	-15.17	-479.7 to 449.4	No	ns	0.9998																															WT rescue vs. T4L rescue	282.9	106.9 to 458.9	Yes	***	0.0003
			CRE vs. WT rescue	121.4	-396.8 to 639.6	No	ns	0.9302
			CRE vs. T4L rescue	29.09	-435.5 to 493.6	No	ns	0.9985																															Row 4
			WT rescue vs. T4L rescue	-92.31	-570.4 to 385.8	No	ns	0.9592																															Control vs. CRE	275.3	89.08 to 461.5	Yes	***	0.0009
																																							Control vs. WT rescue	-26.19	-217.0 to 164.6	No	ns	0.9847
			Row 4																																				Control vs. T4L rescue	225.2	54.14 to 396.2	Yes	**	0.0042
			Control vs. CRE	-164.7	-670.4 to 341.0	No	ns	0.8344																															CRE vs. WT rescue	-301.5	-492.3 to -110.7	Yes	***	0.0003
			Control vs. WT rescue	5.359	-512.9 to 523.6	No	ns	>0.9999																															CRE vs. T4L rescue	-50.11	-221.2 to 120.9	No	ns	0.8734
			Control vs. T4L rescue	-146.7	-611.3 to 317.8	No	ns	0.8466																															WT rescue vs. T4L rescue	251.4	75.33 to 427.4	Yes	**	0.0015
			CRE vs. WT rescue	170.1	-348.2 to 688.3	No	ns	0.8312
			CRE vs. T4L rescue	17.97	-446.6 to 482.5	No	ns	0.9996																															Row 5
			WT rescue vs. T4L rescue	-152.1	-630.2 to 326.0	No	ns	0.8438																															Control vs. CRE	288	101.8 to 474.2	Yes	***	0.0005
																																							Control vs. WT rescue	-28.07	-218.9 to 162.7	No	ns	0.9812
			Row 5																																				Control vs. T4L rescue	249.3	78.27 to 420.4	Yes	**	0.0012
			Control vs. CRE	-140.3	-646.0 to 365.5	No	ns	0.8903																															CRE vs. WT rescue	-316.1	-506.9 to -125.3	Yes	***	0.0002
			Control vs. WT rescue	-105.7	-623.9 to 412.5	No	ns	0.9524																															CRE vs. T4L rescue	-38.69	-209.7 to 132.4	No	ns	0.9366
			Control vs. T4L rescue	-108	-572.5 to 356.6	No	ns	0.9317																															WT rescue vs. T4L rescue	277.4	101.3 to 453.4	Yes	***	0.0004
			CRE vs. WT rescue	34.55	-483.7 to 552.8	No	ns	0.9982
			CRE vs. T4L rescue	32.3	-432.3 to 496.9	No	ns	0.9979																															Row 6
			WT rescue vs. T4L rescue	-2.244	-480.4 to 475.9	No	ns	>0.9999																															Control vs. CRE	342	155.8 to 528.2	Yes	****	<0.0001
																																							Control vs. WT rescue	-5.796	-196.6 to 185.0	No	ns	0.9998
			Row 6																																				Control vs. T4L rescue	301.6	130.5 to 472.6	Yes	****	<0.0001
			Control vs. CRE	-214.3	-720.1 to 291.4	No	ns	0.6926																															CRE vs. WT rescue	-347.8	-538.6 to -157.0	Yes	****	<0.0001
			Control vs. WT rescue	-16.05	-534.3 to 502.2	No	ns	0.9998																															CRE vs. T4L rescue	-40.42	-211.5 to 130.6	No	ns	0.9286
			Control vs. T4L rescue	-146.4	-611.0 to 318.1	No	ns	0.8474																															WT rescue vs. T4L rescue	307.4	131.3 to 483.4	Yes	****	<0.0001
			CRE vs. WT rescue	198.3	-320.0 to 716.5	No	ns	0.7558
			CRE vs. T4L rescue	67.88	-396.7 to 532.4	No	ns	0.9816
			WT rescue vs. T4L rescue	-130.4	-608.5 to 347.7	No	ns	0.895
[truncated: 20 more columns]
