# Supplementary material for: Latrophilin GPCR signaling mediates synapse formation
Source: eLife. 2021 Mar 1;10:e65717. doi: 10.7554/eLife.65717 (PMC7954527; doi:10.7554/eLife.65717)
Supplement: Figure 5—source data 1. [file elife-65717-fig5-data1.xlsx]

## Sheet: Sheet1
	Figure 5B and C																																						Figure 5E and F
		Rescue of Lphn3 cKO with T4L/WT Lphn3																																						Rescue of Lphn3 cKO with T4L/WT Lphn3
																																								Control perforant pathway						slope			Cre perforant pathway
		Control Schaffer collateral						slope			Cre Schaffer collateral						slope			WT Lphn3 rescue Schaffer collateral						slope			T4L Lphn3 rescue Schaffer collateral						slope				Stimulation intensity (uA)	20	40	60	80	100	120				20
	Stimulation intensity (uA)	20	40	60	80	100	120				20	40	60	80	100	120				20	40	60	80	100	120				20	40	60	80	100	120						25	115.4	160.8	243.2	427.6	521	5			46.7
		56.7	157.8	404.2	618.7	751.3	1269	11.509			98.6	156.7	298	381.1	399.1	404.6	3.34			229.7	381.2	475.5	551.5	646.1	719.9	4.75			0	0	195.7	317.4	423	431.5	3.48					27.5	225.8	232.8	395.5	467.2	638.7	5.63			150.7
		11.4	488.1	691.6	925.3	1034.3	1234.7	11.413			8.2	64.3	133.9	298.1	483.1	663	6.7			115.7	250.9	623.2	886.5	1102.6	1211.2	11.85			26.6	101.3	209.7	260	309.1	379.6	5.07					108.3	215.1	275.6	375	308.8	407.1	2.68			21.7
		18.4	222.6	499.1	689.1	911.7	1208	11.722			48.8	190.09	332.6	473.7	517.3	595.9	5.51			189.3	389.01	445.3	759.9	1110	1188	10.67			147.4	290.5	412.3	507.4	640	670.5	5.37					71.1	126	198.4	289.6	300.3	412.3	3.31			32
		59.4	419.1	688.3	856.2	1176	1376.9	12.89			33.56	199	291.4	498.3	558.9	601.5	5.89			199.9	451.6	848.7	1085.8	1420.3	1473.4	13.59			0	159.6	265.8	456.5	464.2	610.4	5.94					342.4	456.5	598.4	703.7	786.1	826.1	5.018			34.8
		16.9	369.9	702.4	910.2	1012.5	1149.8	11.14			12.7	51.6	141.8	215.6	333.2	410.3	4.15			34.6	127.8	279.9	408	559.9	953.1	8.6			25.9	67.1	188	307.9	324.4	469.7	4.44					21.4	184.9	262.1	281.1	285.3	352.2	2.82			156.9
		12.5	256.3	531.6	704.1	887.3	933.01	9.53			68.9	184	281.4	497.6	590.1	696.7	6.53			62	255.6	298.8	651.9	843.4	991.3	9.66			97.1	156.7	223.2	311	450.9	491	4.2					33.3	111	150.3	200.1	363.4	389	3.69			152
		16.3	320.1	589.9	701.3	850.3	901.58	8.75			79.5	252.2	369.03	486.9	411.2	413	3.23			129	368	414.1	695.4	740.1	992.4	8.16			78.1	170	219	291.4	460.4	495.1	4.33					47.2	187.5	202.9	219	284.1	303.1	2.26			112.3
		17.4	371.1	608.4	891.4	920	956.4	9.46			18.6	56.7	77.8	112.9	167.4	288	2.45			301.4	404.4	412	812	1290	1310	11.57			83.1	133.2	240.8	281	473	489.8	4.42														144.8
											63.1	144.3	291	597	611	831.4	7.93
																																															Slope analysis
									Slope analysis																														Two-way ANOVA	Ordinary							ANOVA summary
	Two-way ANOVA	Ordinary							ANOVA summary																														Alpha	0.05							F	0.148
	Alpha	0.05							F	24.57																																					P value	0.9301
									P value	<0.0001																													Source of Variation	% of total variation	P value	P value summary	Significant?				P value summary	ns
	Source of Variation	% of total variation	P value	P value summary	Significant?				P value summary	****																													Interaction	0.4576	>0.9999	ns	No				Significant diff. among means (P < 0.05)?	No
	Interaction	7.837	<0.0001	****	Yes				Significant diff. among means (P < 0.05)?	Yes																													Row Factor	39.19	<0.0001	****	Yes				R squared	0.01508
	Row Factor	55.91	<0.0001	****	Yes				R squared	0.7176																													Column Factor	0.06585	0.9791	ns	No
	Column Factor	23.02	<0.0001	****	Yes																																										Tukey's multiple comparisons test	Mean Diff.	95.00% CI of diff.
									Tukey's multiple comparisons test	Mean Diff.	95.00% CI of diff.	Significant?	Summary	Adjusted P Value																									ANOVA table	SS (Type III)	DF	MS	F (DFn, DFd)	P value			Control vs. CRE	0.1532	-2.363 to 2.669
	ANOVA table	SS (Type III)	DF	MS	F (DFn, DFd)	P value			Control vs. CRE	5.721	3.288 to 8.154	Yes	****	<0.0001																									Interaction	42100	15	2807	F (15, 174) = 0.08795	P>0.9999			Control vs. WT rescue	-0.384	-2.973 to 2.205
	Interaction	1871201	15	124747	F (15, 174) = 6.403	P<0.0001			Control vs. WT rescue	0.9455	-1.558 to 3.449	No	ns	0.7341																									Row Factor	3605916	5	721183	F (5, 174) = 22.60	P<0.0001			Control vs. T4L rescue	-0.3003	-2.889 to 2.289
	Row Factor	13350313	5	2670063	F (5, 174) = 137.1	P<0.0001			Control vs. T4L rescue	6.146	3.642 to 8.649	Yes	****	<0.0001																									Column Factor	6058	3	2019	F (3, 174) = 0.06329	P=0.9791			CRE vs. WT rescue	-0.5372	-3.053 to 1.979
	Column Factor	5496892	3	1832297	F (3, 174) = 94.05	P<0.0001			CRE vs. WT rescue	-4.775	-7.208 to -2.342	Yes	****	<0.0001																									Residual	5552379	174	31910					CRE vs. T4L rescue	-0.4535	-2.970 to 2.063
	Residual	3389904	174	19482					CRE vs. T4L rescue	0.4249	-2.008 to 2.858	No	ns	0.9638																																	WT rescue vs. T4L rescue	0.08375	-2.505 to 2.673
									WT rescue vs. T4L rescue	5.2	2.696 to 7.704	Yes	****	<0.0001																									Tukey's multiple comparisons test	Predicted (LS) mean diff.	95.00% CI of diff.	Significant?	Summary	Adjusted P Value
	Tukey's multiple comparisons test	Predicted (LS) mean diff.	95.00% CI of diff.	Significant?	Summary	Adjusted P Value
																																							Row 1
	Row 1																																						Control vs. CRE	-10.13	-235.3 to 215.0	No	ns	0.9994
	Control vs. CRE	-21.87	-197.8 to 154.1	No	ns	0.9884																																	Control vs. WT rescue	27	-204.7 to 258.7	No	ns	0.9904
	Control vs. WT rescue	-131.6	-312.6 to 49.46	No	ns	0.2381																																	Control vs. T4L rescue	-12.78	-244.5 to 218.9	No	ns	0.999
	Control vs. T4L rescue	-31.15	-212.2 to 149.9	No	ns	0.9703																																	CRE vs. WT rescue	37.13	-188.0 to 262.3	No	ns	0.9737
	CRE vs. WT rescue	-109.7	-285.6 to 66.23	No	ns	0.3715																																	CRE vs. T4L rescue	-2.644	-227.8 to 222.5	No	ns	>0.9999
	CRE vs. T4L rescue	-9.279	-185.2 to 166.7	No	ns	0.9991																																	WT rescue vs. T4L rescue	-39.78	-271.5 to 191.9	No	ns	0.9704
	WT rescue vs. T4L rescue	100.4	-80.61 to 281.5	No	ns	0.4769
																																							Row 2
	Row 2																																						Control vs. CRE	-13.83	-239.0 to 211.3	No	ns	0.9986
	Control vs. CRE	181.3	5.369 to 357.2	Yes	*	0.0407																																	Control vs. WT rescue	-15.3	-247.0 to 216.4	No	ns	0.9982
	Control vs. WT rescue	-2.939	-184.0 to 178.1	No	ns	>0.9999																																	Control vs. T4L rescue	6.612	-225.1 to 238.3	No	ns	0.9999
	Control vs. T4L rescue	190.8	9.789 to 371.9	Yes	*	0.0345																																	CRE vs. WT rescue	-1.475	-226.6 to 223.7	No	ns	>0.9999
	CRE vs. WT rescue	-184.2	-360.2 to -8.308	Yes	*	0.0362																																	CRE vs. T4L rescue	20.44	-204.7 to 245.6	No	ns	0.9954
	CRE vs. T4L rescue	9.521	-166.4 to 185.5	No	ns	0.999																																	WT rescue vs. T4L rescue	21.91	-209.8 to 253.6	No	ns	0.9948
	WT rescue vs. T4L rescue	193.8	12.73 to 374.8	Yes	*	0.0308
																																							Row 3
	Row 3																																						Control vs. CRE	-21.93	-247.1 to 203.2	No	ns	0.9943
	Control vs. CRE	343.1	167.2 to 519.0	Yes	****	<0.0001																																	Control vs. WT rescue	-26.69	-258.4 to 205.0	No	ns	0.9907
	Control vs. WT rescue	114.8	-66.29 to 295.8	No	ns	0.3567																																	Control vs. T4L rescue	-4.563	-236.3 to 227.1	No	ns	>0.9999
	Control vs. T4L rescue	345.1	164.1 to 526.2	Yes	****	<0.0001																																	CRE vs. WT rescue	-4.761	-229.9 to 220.4	No	ns	>0.9999
	CRE vs. WT rescue	-228.4	-404.3 to -52.43	Yes	**	0.0051																																	CRE vs. T4L rescue	17.36	-207.8 to 242.5	No	ns	0.9972
	CRE vs. T4L rescue	2.013	-173.9 to 177.9	No	ns	>0.9999																																	WT rescue vs. T4L rescue	22.12	-209.6 to 253.8	No	ns	0.9946
	WT rescue vs. T4L rescue	230.4	49.34 to 411.4	Yes	**	0.0064
																																							Row 4
	Row 4																																						Control vs. CRE	-18.18	-243.3 to 207.0	No	ns	0.9967
	Control vs. CRE	391.3	215.4 to 567.3	Yes	****	<0.0001																																	Control vs. WT rescue	37.38	-194.3 to 269.1	No	ns	0.9753
	Control vs. WT rescue	55.66	-125.4 to 236.7	No	ns	0.8555																																	Control vs. T4L rescue	-15.81	-247.5 to 215.9	No	ns	0.998
	Control vs. T4L rescue	445.5	264.4 to 626.5	Yes	****	<0.0001																																	CRE vs. WT rescue	55.55	-169.6 to 280.7	No	ns	0.9189
	CRE vs. WT rescue	-335.7	-511.6 to -159.8	Yes	****	<0.0001																																	CRE vs. T4L rescue	2.365	-222.8 to 227.5	No	ns	>0.9999
	CRE vs. T4L rescue	54.11	-121.8 to 230.0	No	ns	0.8553																																	WT rescue vs. T4L rescue	-53.19	-284.9 to 178.5	No	ns	0.9333
	WT rescue vs. T4L rescue	389.8	208.8 to 570.8	Yes	****	<0.0001
																																							Row 5
	Row 5																																						Control vs. CRE	-14.68	-239.8 to 210.5	No	ns	0.9983
	Control vs. CRE	490.6	314.6 to 666.5	Yes	****	<0.0001																																	Control vs. WT rescue	-25.06	-256.8 to 206.6	No	ns	0.9923
	Control vs. WT rescue	-21.12	-202.2 to 159.9	No	ns	0.9903																																	Control vs. T4L rescue	-35.2	-266.9 to 196.5	No	ns	0.9792
	Control vs. T4L rescue	499.8	318.8 to 680.8	Yes	****	<0.0001																																	CRE vs. WT rescue	-10.38	-235.5 to 214.8	No	ns	0.9994
	CRE vs. WT rescue	-511.7	-687.6 to -335.7	Yes	****	<0.0001																																	CRE vs. T4L rescue	-20.52	-245.7 to 204.6	No	ns	0.9953
	CRE vs. T4L rescue	9.242	-166.7 to 185.2	No	ns	0.9991																																	WT rescue vs. T4L rescue	-10.14	-241.8 to 221.6	No	ns	0.9995
	WT rescue vs. T4L rescue	520.9	339.9 to 702.0	Yes	****	<0.0001
																																							Row 6
	Row 6																																						Control vs. CRE	11.35	-213.8 to 236.5	No	ns	0.9992
	Control vs. CRE	583.7	407.8 to 759.7	Yes	****	<0.0001																																	Control vs. WT rescue	-33.45	-265.1 to 198.2	No	ns	0.982
	Control vs. WT rescue	23.76	-157.3 to 204.8	No	ns	0.9864																																	Control vs. T4L rescue	-27.23	-258.9 to 204.5	No	ns	0.9901
	Control vs. T4L rescue	624	442.9 to 805.0	Yes	****	<0.0001																																	CRE vs. WT rescue	-44.8	-270.0 to 180.4	No	ns	0.9551
	CRE vs. WT rescue	-560	-735.9 to -384.0	Yes	****	<0.0001																																	CRE vs. T4L rescue	-38.58	-263.7 to 186.6	No	ns	0.9706
	CRE vs. T4L rescue	40.23	-135.7 to 216.2	No	ns	0.934																																	WT rescue vs. T4L rescue	6.225	-225.5 to 237.9	No	ns	0.9999
	WT rescue vs. T4L rescue	600.2	419.2 to 781.2	Yes	****	<0.0001
[truncated: 20 more columns]
