# Supplementary material for: Latrophilin GPCR signaling mediates synapse formation
Source: eLife. 2021 Mar 1;10:e65717. doi: 10.7554/eLife.65717 (PMC7954527; doi:10.7554/eLife.65717)
Supplement: Figure 6—source data 1. [file elife-65717-fig6-data1.xlsx]

## Sheet: Sheet1
	Figure 6C
	Ratio of EGFP+ cells/starter cells
	ipsilateral CA3								contralateral CA3								Entorhinal cortex
	control	cre	WT Lphn3 rescue	T4L Lphn3 rescue					control	cre	WT Lphn3 rescue	T4L Lphn3 rescue					control	cre	WT Lphn3 rescue	T4L Lphn3 rescue
	7.5442	1.653	8.7656	3.654					8.546	2.754	8.8767	4.0878					2.134	1.092	1.212	1.212
	4.6534	4.3453	5.345	5.6545					4.6545	4.654	6.4545	3.978					1.212	1.6545	1.034	1.79
	5.823	2.685	6.8757	2.4543					4.9878	3.653	4.765	2.767					0.897	2.212	1.99	2.21
	6.3454	6.4543	4.9768	4.324					6.154	5.2435	5.454	4.989					1.0987	0.987	0.789	0.79786
	7.864	3.323	4.998	2.676					5.6545	2.65	5.078	5.987					1.643	0.786	1.543	0.8776
	4.8642	2.977		4.1143					5.34	3.764		3.712					1.312	1.432		1.043
				2.765								3.876								1.29
	ANOVA summary								ANOVA summary								ANOVA summary
	F	6.339							F	4.986							F	0.0283
	P value	0.0034							P value	0.0096							P value	0.9934
	P value summary	**							P value summary	**							P value summary	ns
	Significant diff. among means (P < 0.05)?	Yes							Significant diff. among means (P < 0.05)?	Yes							Significant diff. among means (P < 0.05)?	No
	R squared	0.4874							R squared	0.4279							R squared	0.004228
	Tukey's multiple comparisons test	Mean Diff.	95.00% CI of diff.	Significant?	Summary	Adjusted P Value			Tukey's multiple comparisons test	Mean Diff.	95.00% CI of diff.	Significant?	Summary	Adjusted P Value			Tukey's multiple comparisons test	Mean Diff.	95.00% CI of diff.	Significant?	Summary	Adjusted P Value
	control vs. cre	2.609	0.2883 to 4.931	Yes	*	0.0241			control vs. cre	2.103	0.04548 to 4.161	Yes	*	0.044			control vs. cre	0.0222	-0.7683 to 0.8127	No	ns	0.9998
	control vs. WT Lphn3 rescue	-0.009853	-2.444 to 2.425	No	ns	>0.9999			control vs. WT Lphn3 rescue	-0.2362	-2.394 to 1.922	No	ns	0.9897			control vs. WT Lphn3 rescue	0.06918	-0.7599 to 0.8982	No	ns	0.9954
	control vs. T4L Lphn3 rescue	2.519	0.2825 to 4.756	Yes	*	0.0238			control vs. T4L Lphn3 rescue	1.69	-0.2928 to 3.673	No	ns	0.1124			control vs. T4L Lphn3 rescue	0.06557	-0.6961 to 0.8273	No	ns	0.9949
	cre vs. WT Lphn3 rescue	-2.619	-5.054 to -0.1849	Yes	*	0.0321			cre vs. WT Lphn3 rescue	-2.339	-4.497 to -0.1812	Yes	*	0.0306			cre vs. WT Lphn3 rescue	0.04698	-0.7821 to 0.8760	No	ns	0.9985
	cre vs. T4L Lphn3 rescue	-0.09022	-2.327 to 2.146	No	ns	0.9995			cre vs. T4L Lphn3 rescue	-0.4131	-2.396 to 1.570	No	ns	0.936			cre vs. T4L Lphn3 rescue	0.04337	-0.7183 to 0.8051	No	ns	0.9985
	WT Lphn3 rescue vs. T4L Lphn3 rescue	2.529	0.1750 to 4.883	Yes	*	0.0324			WT Lphn3 rescue vs. T4L Lphn3 rescue	1.926	-0.1607 to 4.013	No	ns	0.077			WT Lphn3 rescue vs. T4L Lphn3 rescue	-0.003609	-0.8053 to 0.7981	No	ns	>0.9999
